# Supplementary material
Source: PubMed Central journal article supplement (PMC4845728)
Supplement: NIHMS733599-supplement-supp_data1.pdf [file NIHMS733599-supplement-supp_data1.pdf]

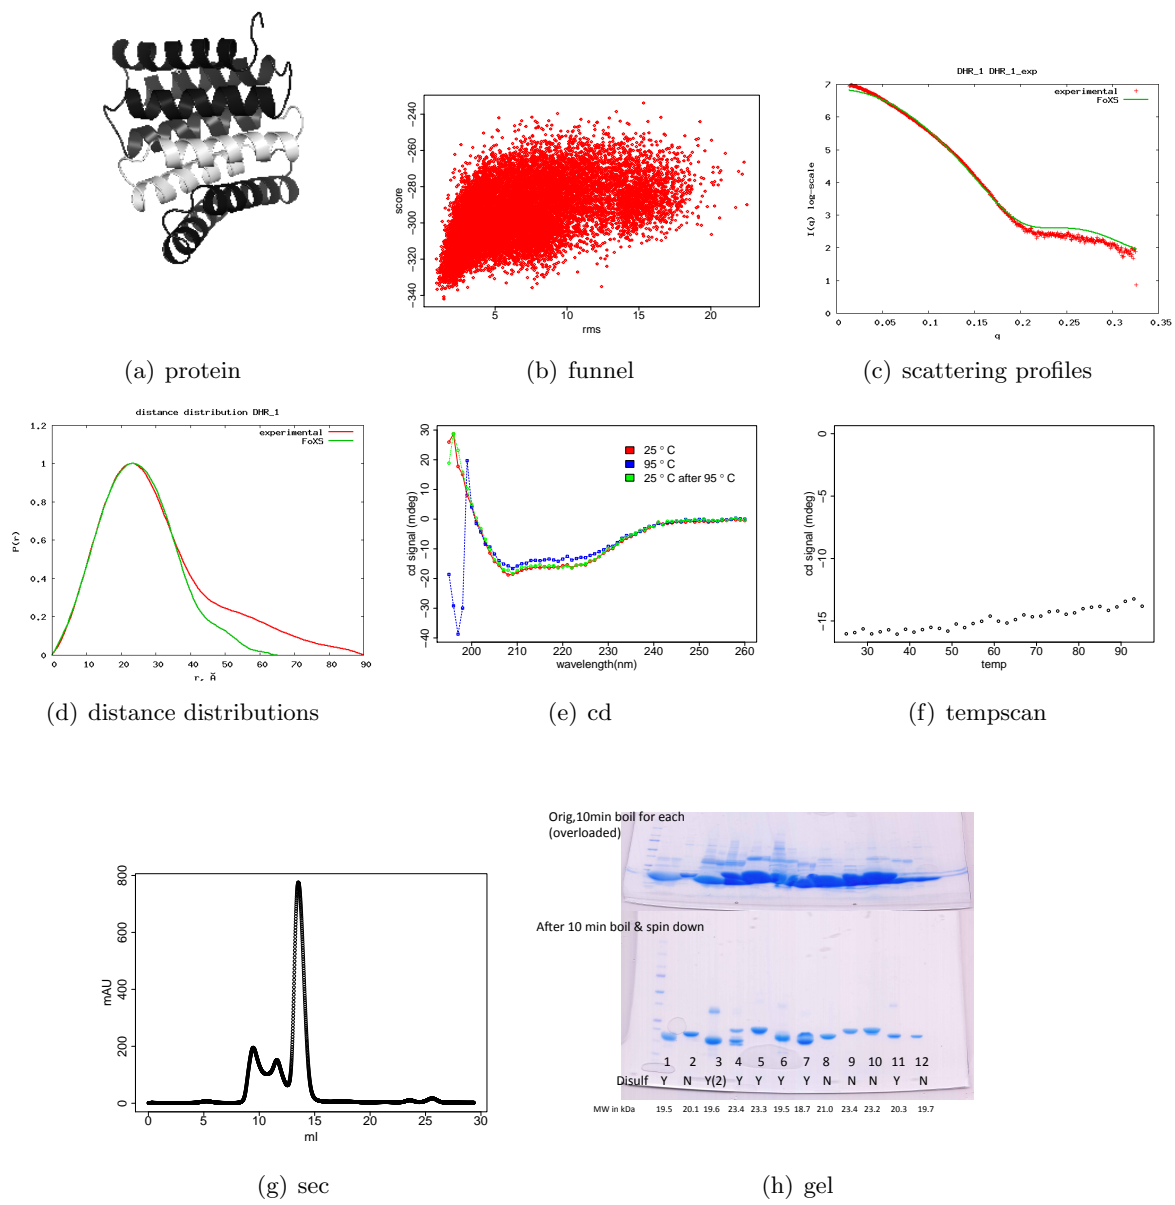

Figure 1: Protein : DHR1 labeled as 1 in gel.

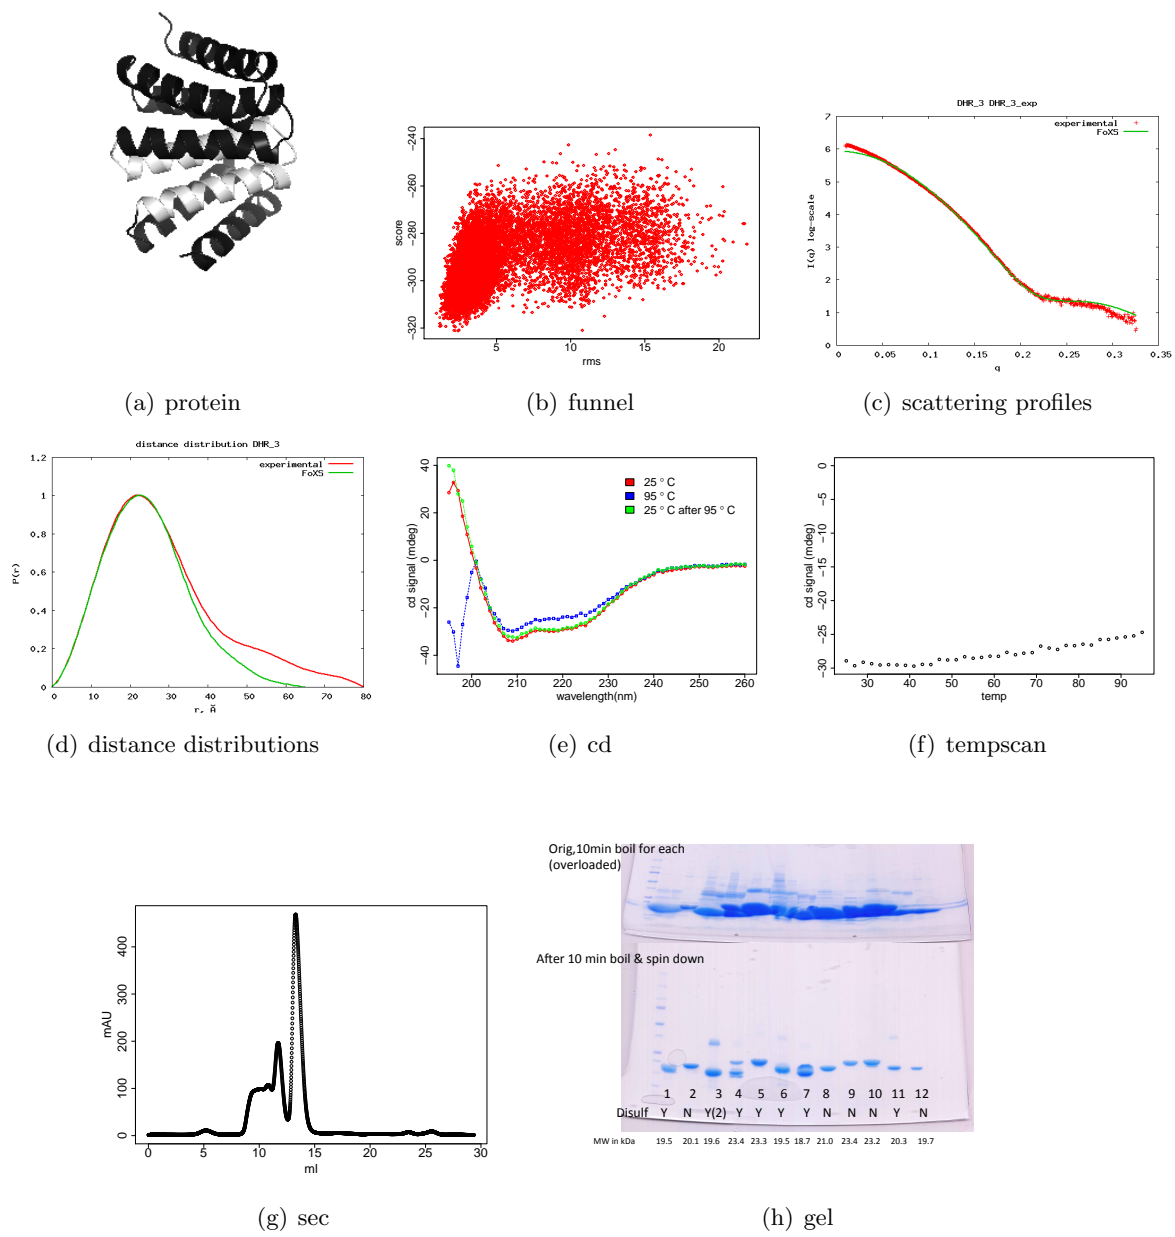

Figure 2: Protein : DHR3 labeled as 3 in gel.

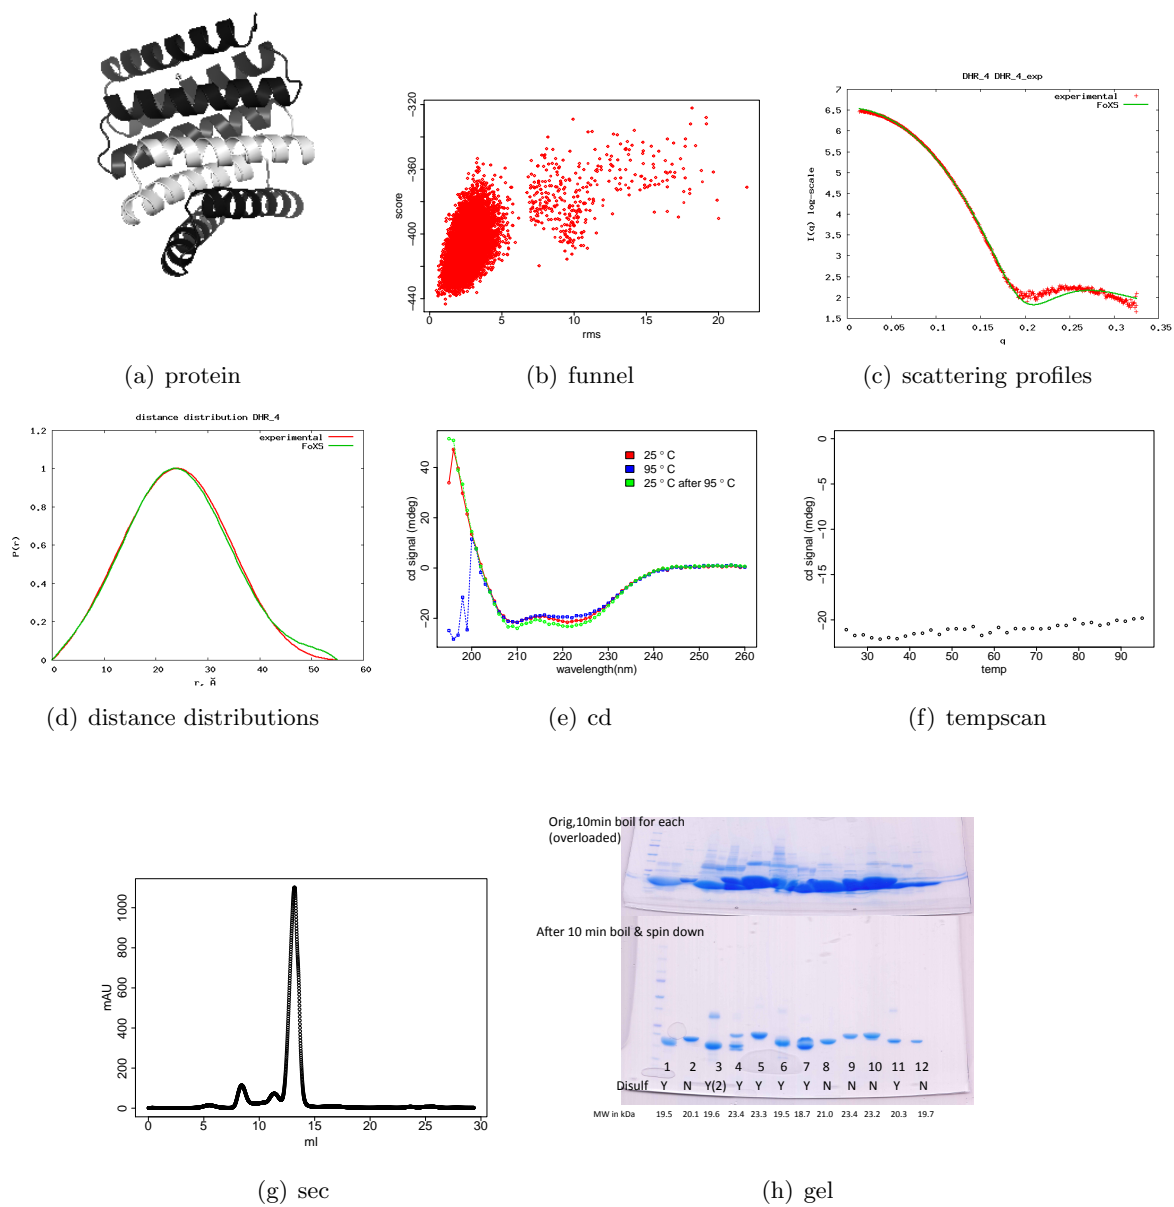

Figure 3: Protein : DHR4 labeled as 4 in gel.

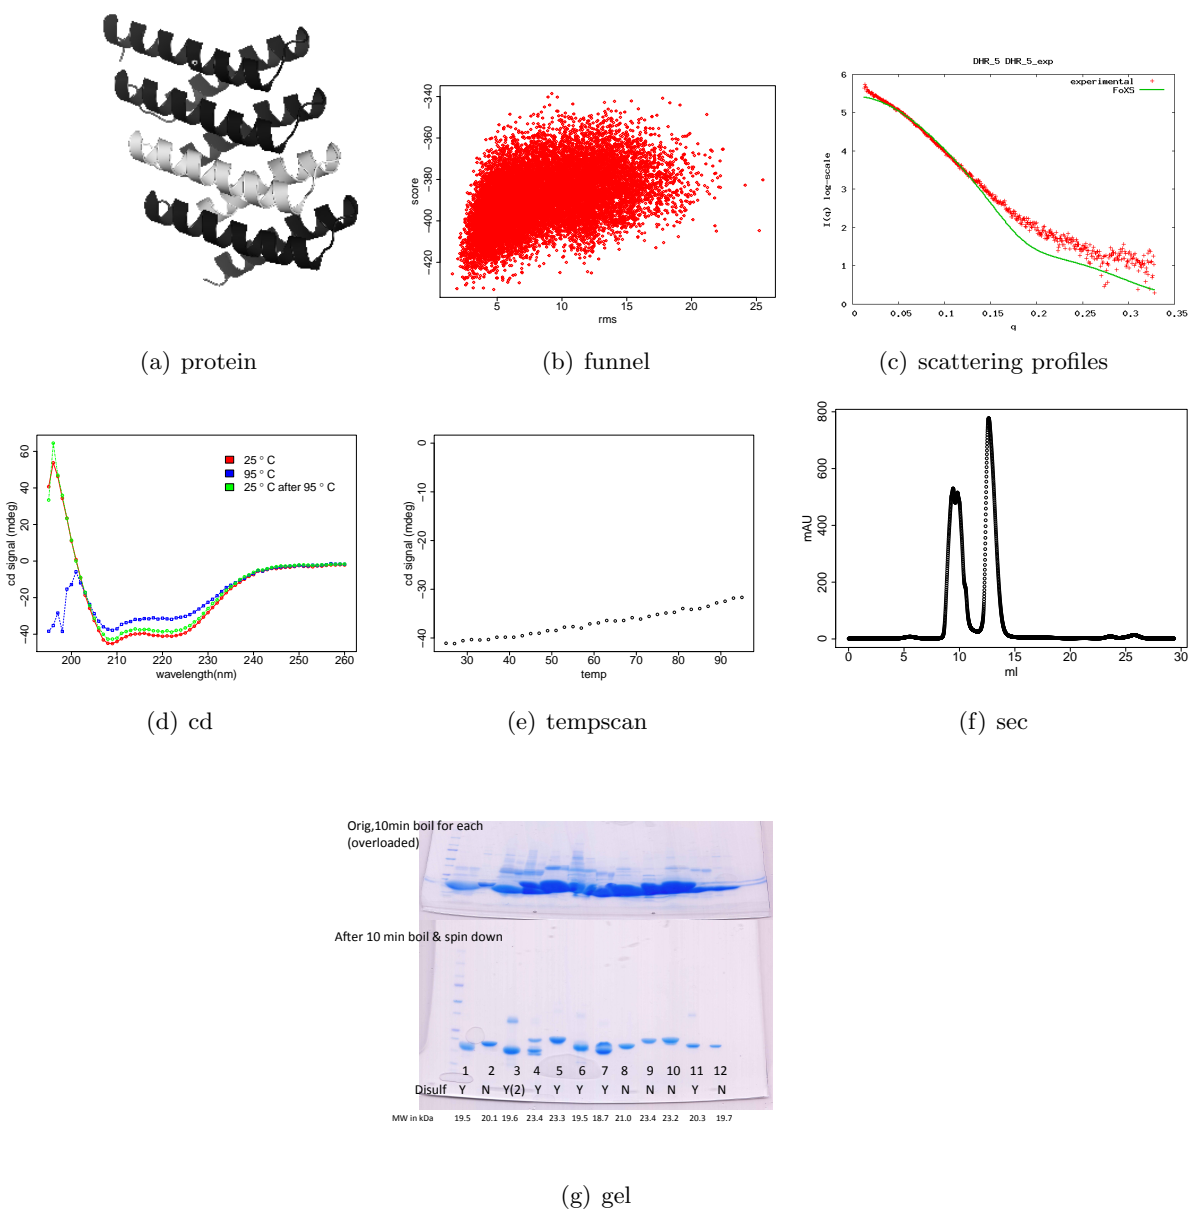

Figure 4: Protein : DHR5 labeled as 5 in gel.

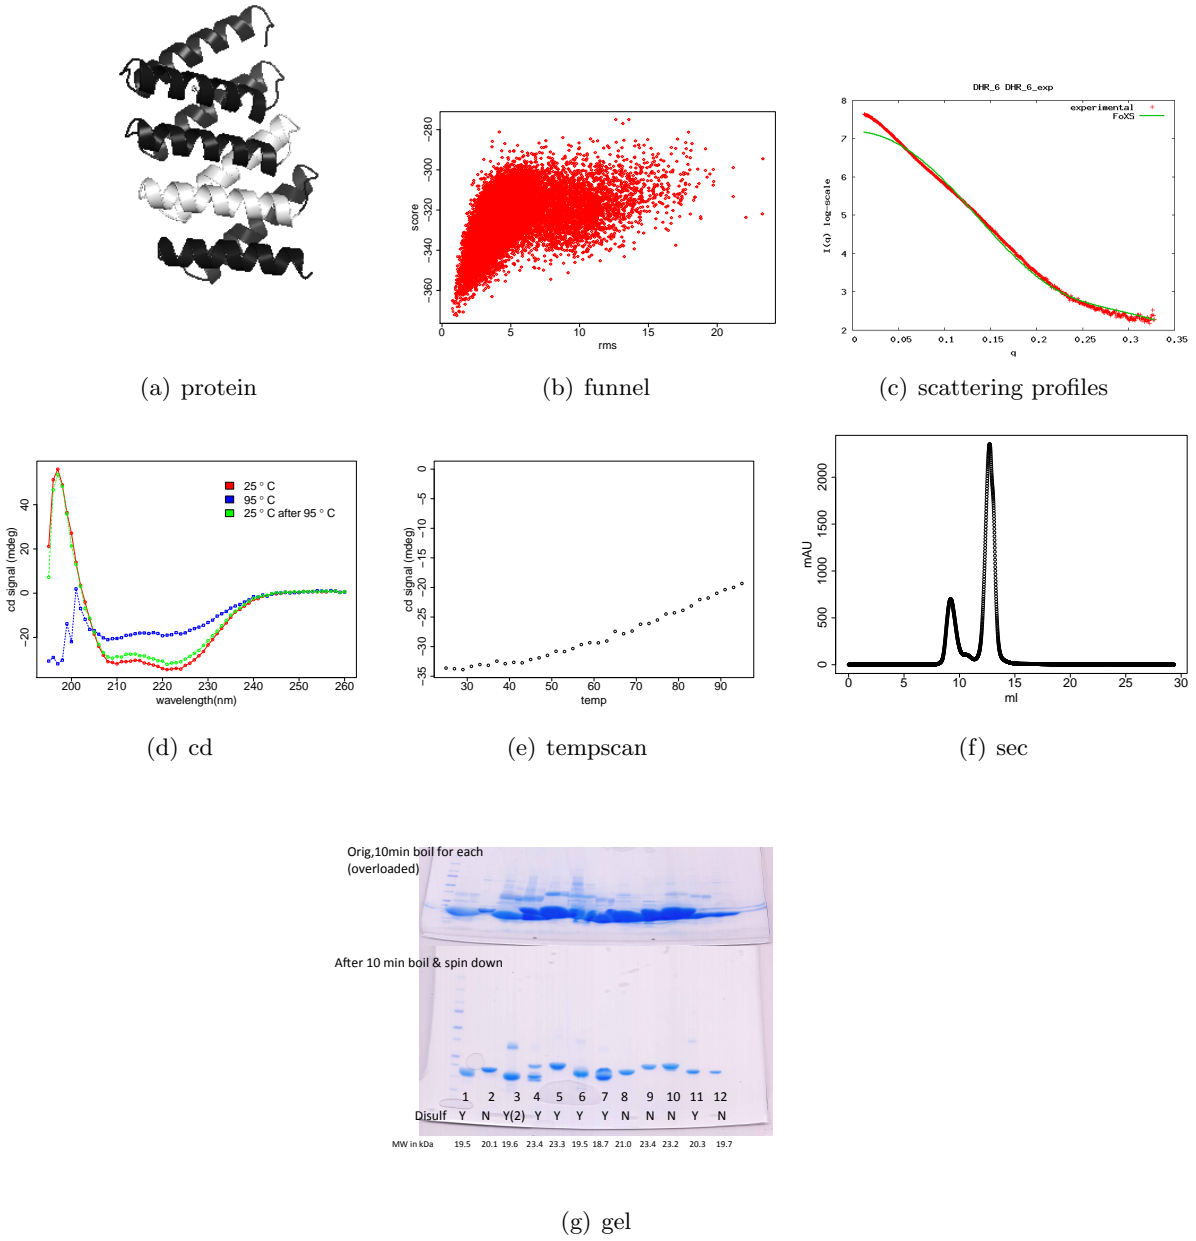

Figure 5: Protein : DHR6 labeled as 6 in gel.

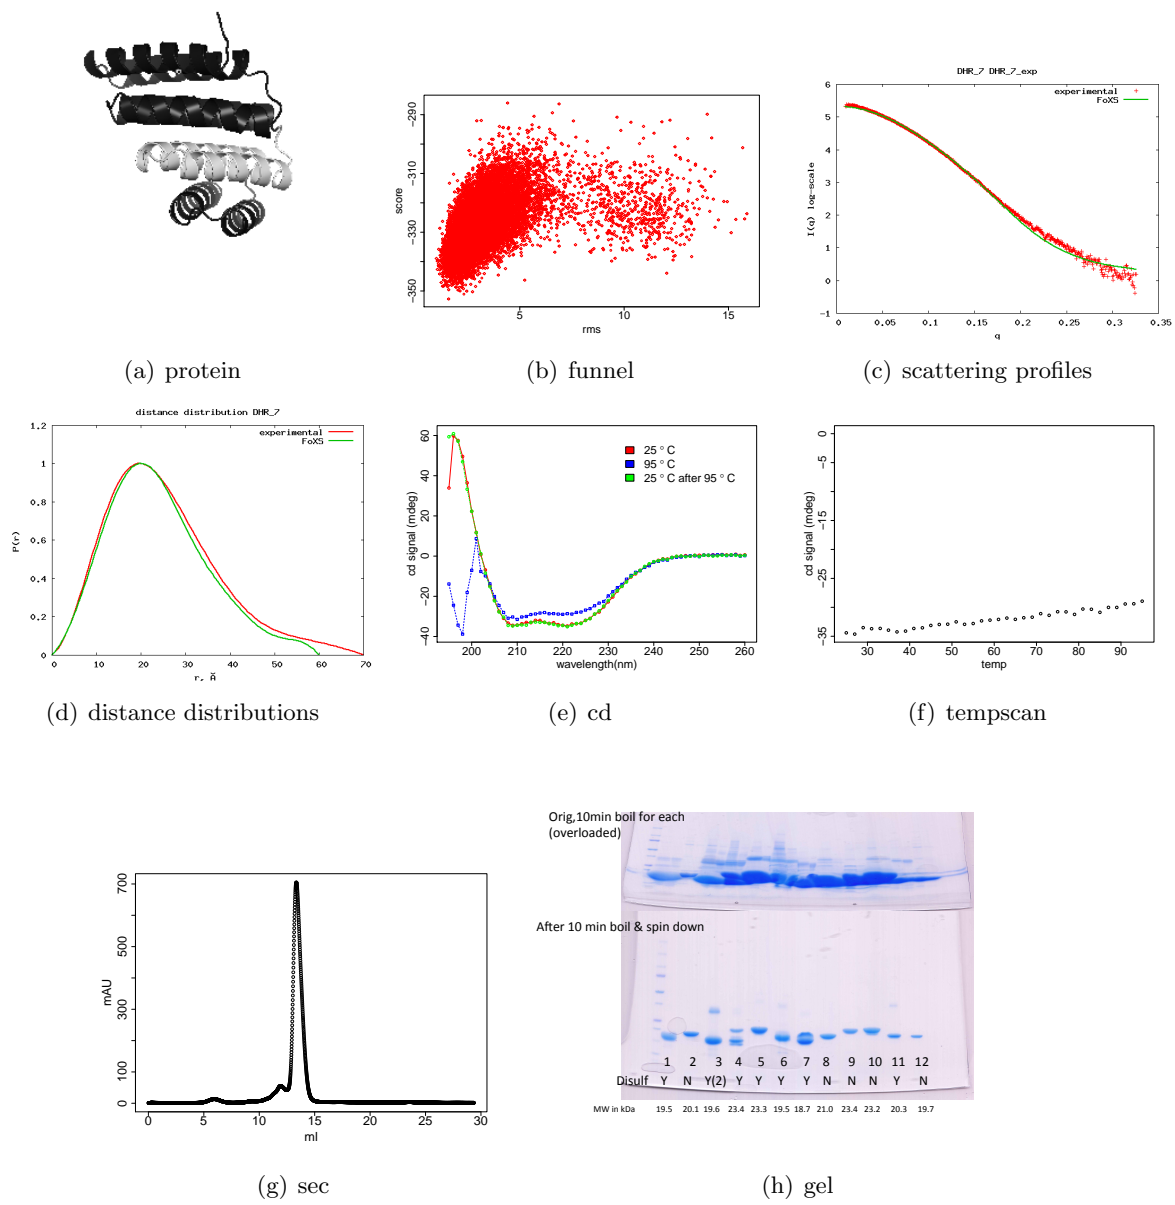

Figure 6: Protein : DHR7 labeled as 7 in gel.

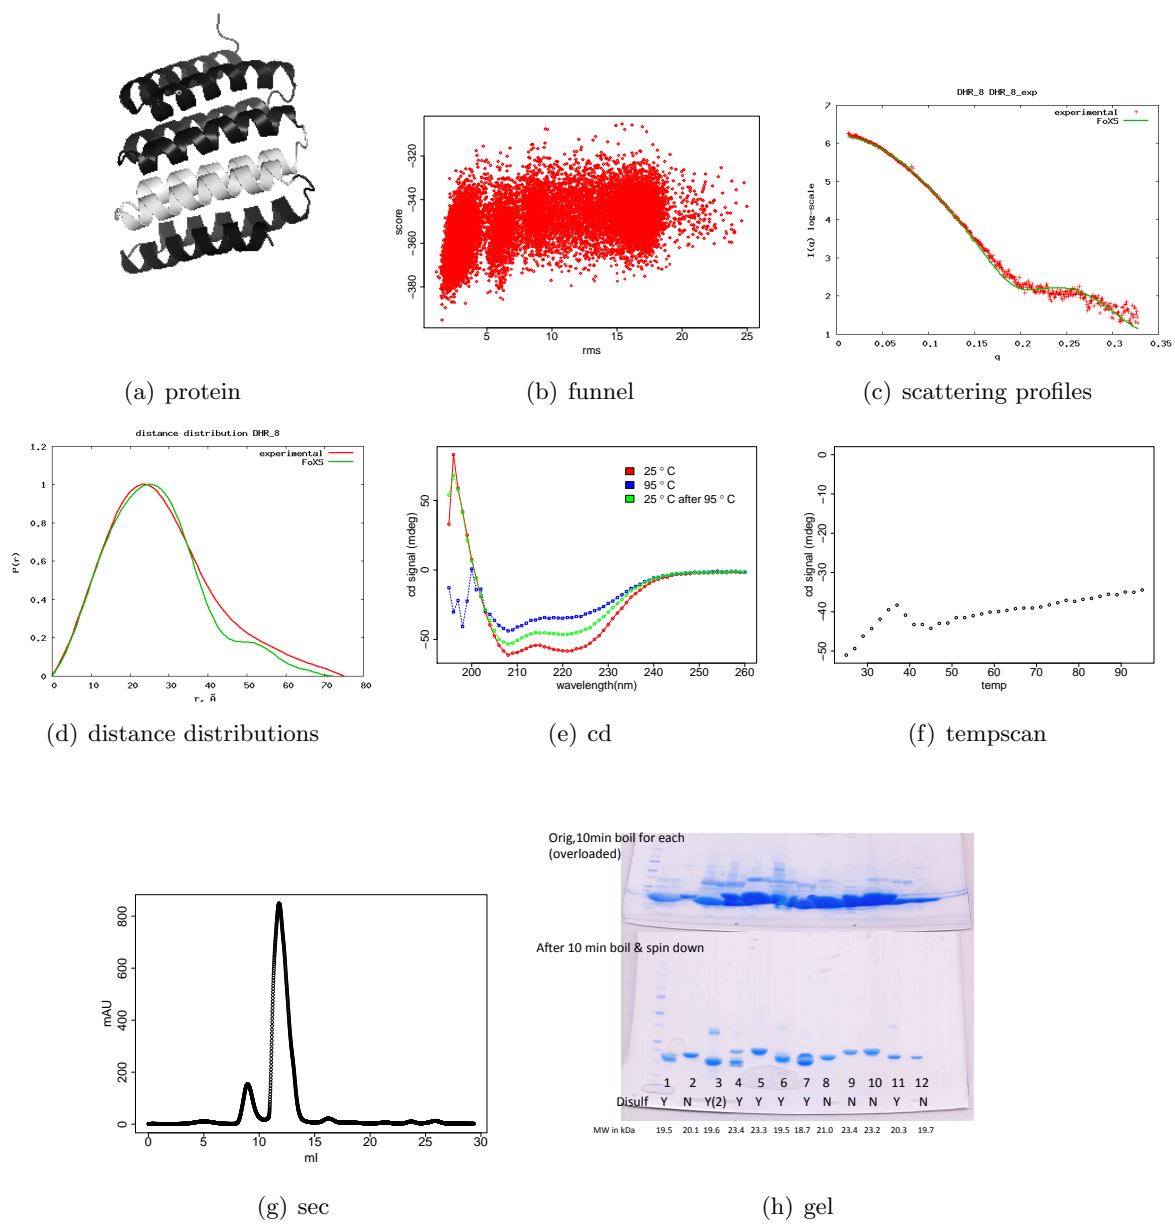

Figure 7: Protein : DHR8 labeled as 8 in gel.

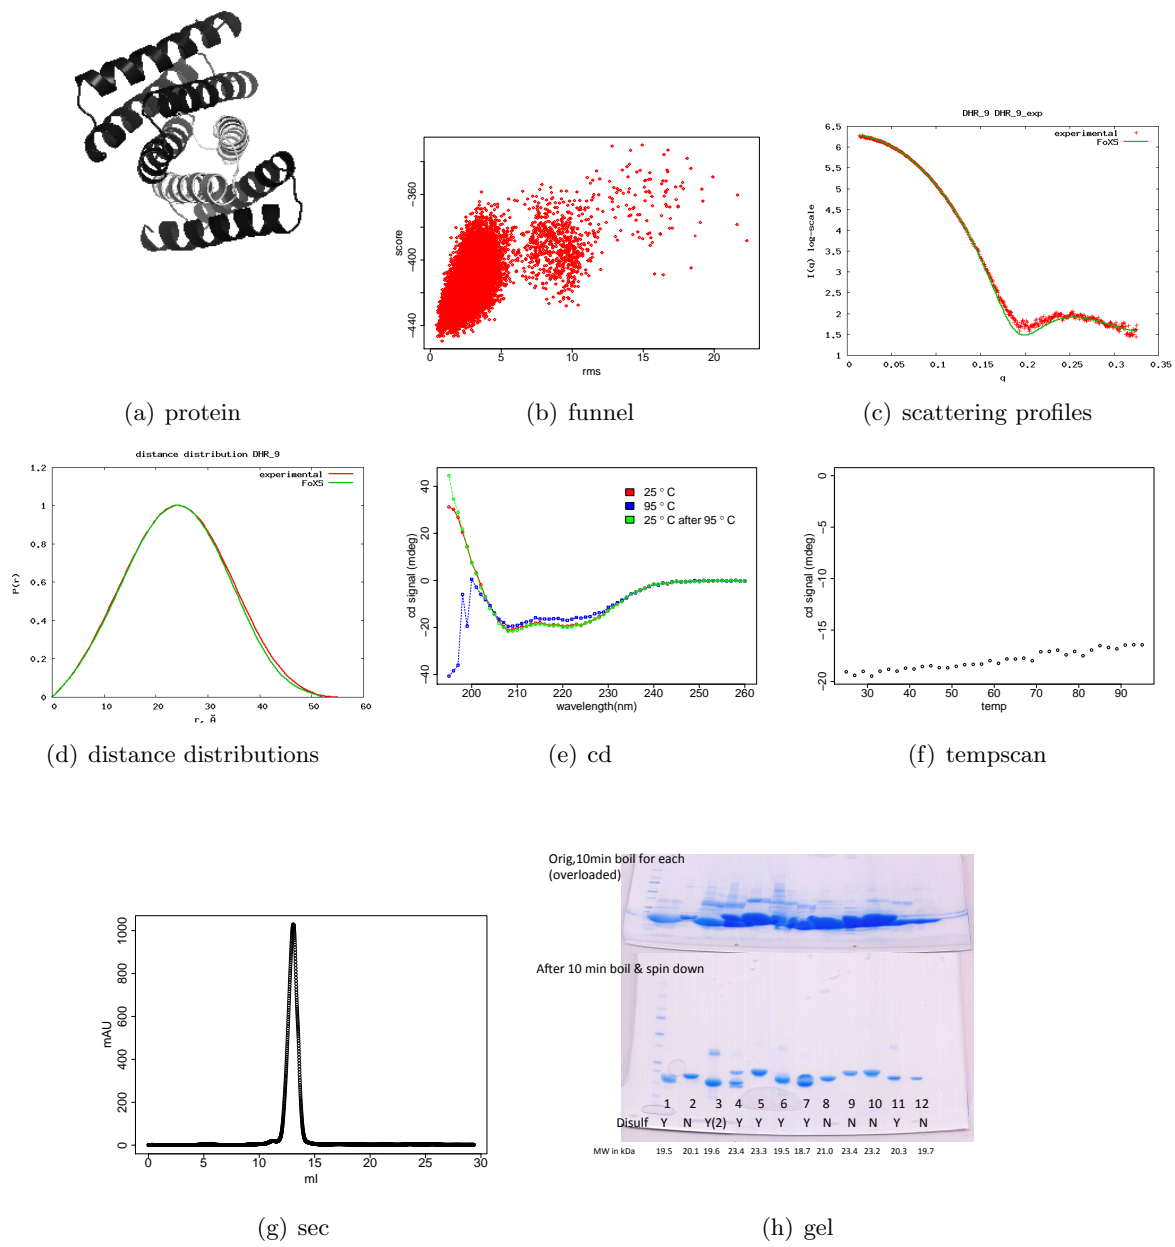

Figure 8: Protein : DHR9 labeled as 9 in gel.



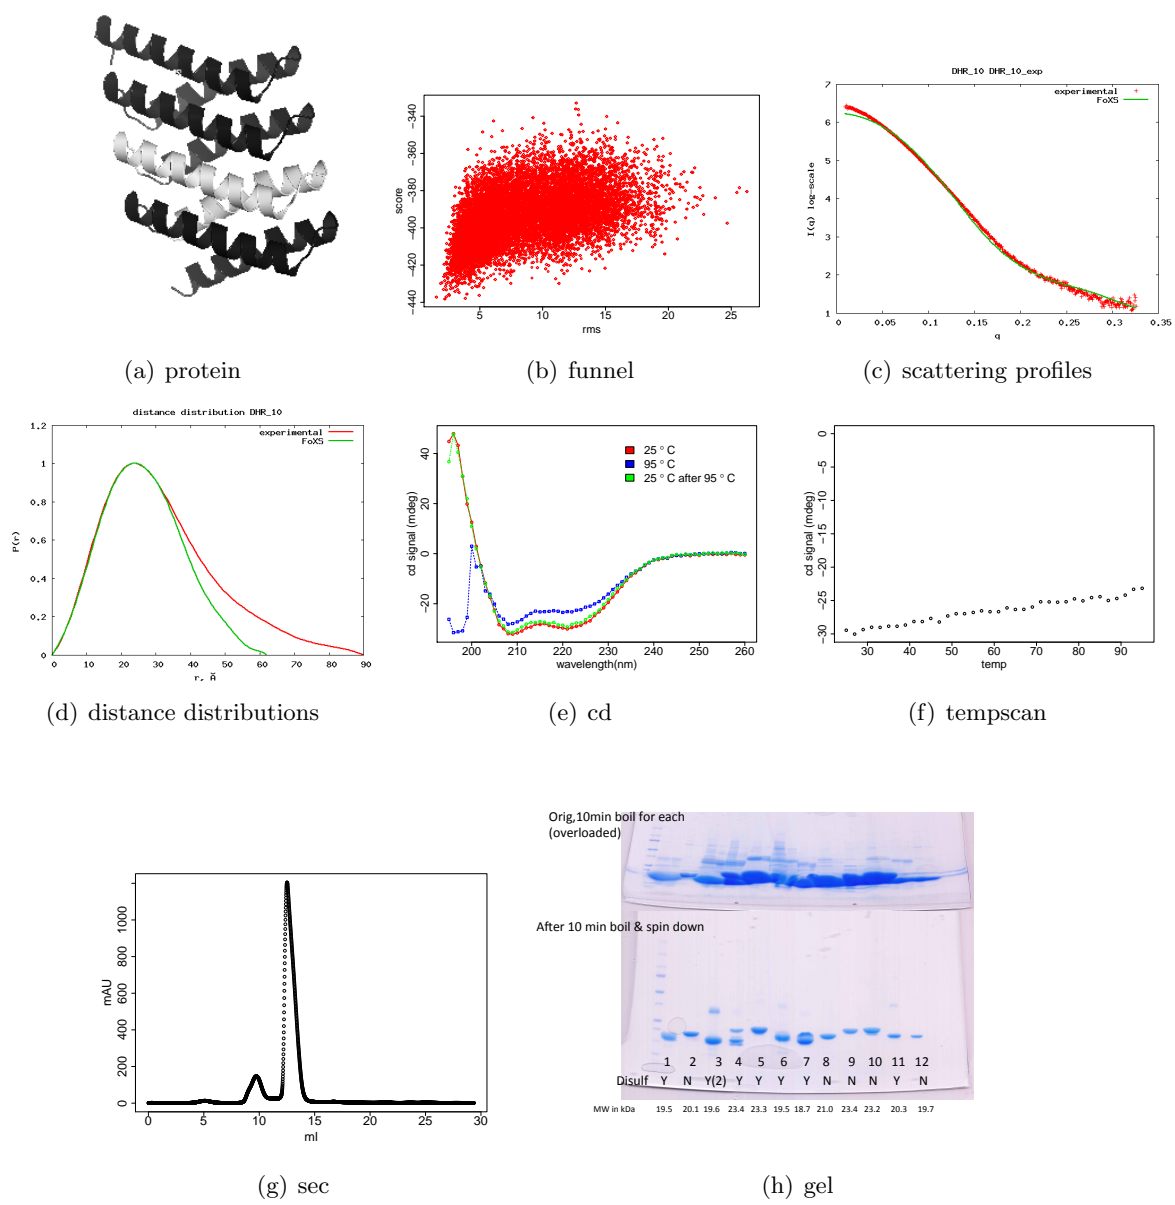

Figure 9: Protein : DHR10 labeled as 10 in gel.

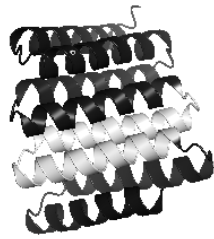

(a) protein

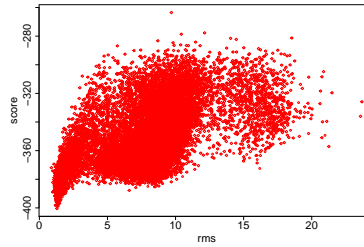

(b) funnel

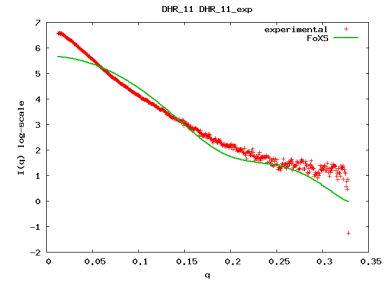

(c) scattering profiles

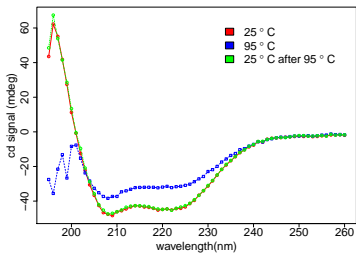

(d) cd

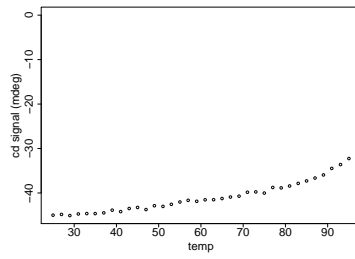

(e) tempscan

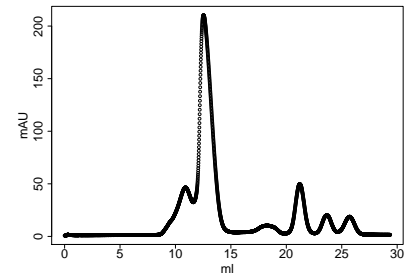

(f) sec

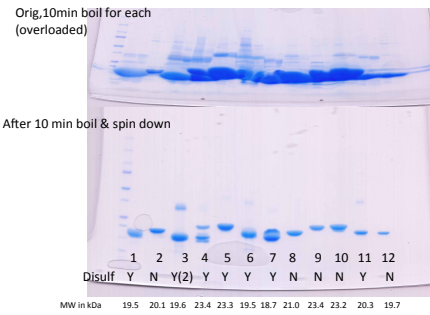

(g) gel

Figure 10: Protein : DHR11 labeled as 11 in gel.

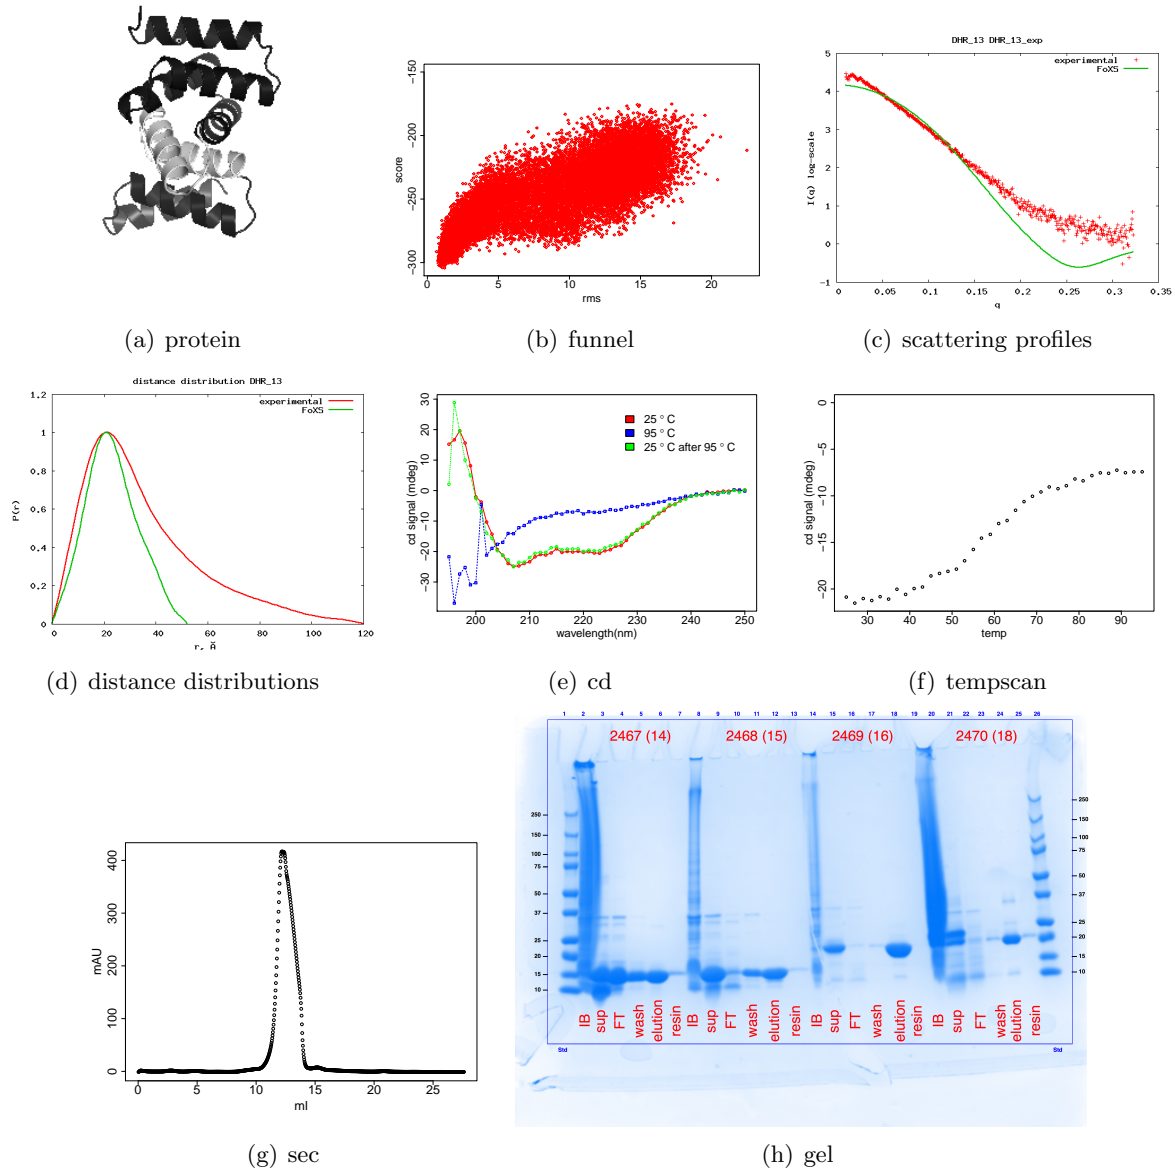

Figure 11: Protein : DHR13 labeled as 14 in gel.

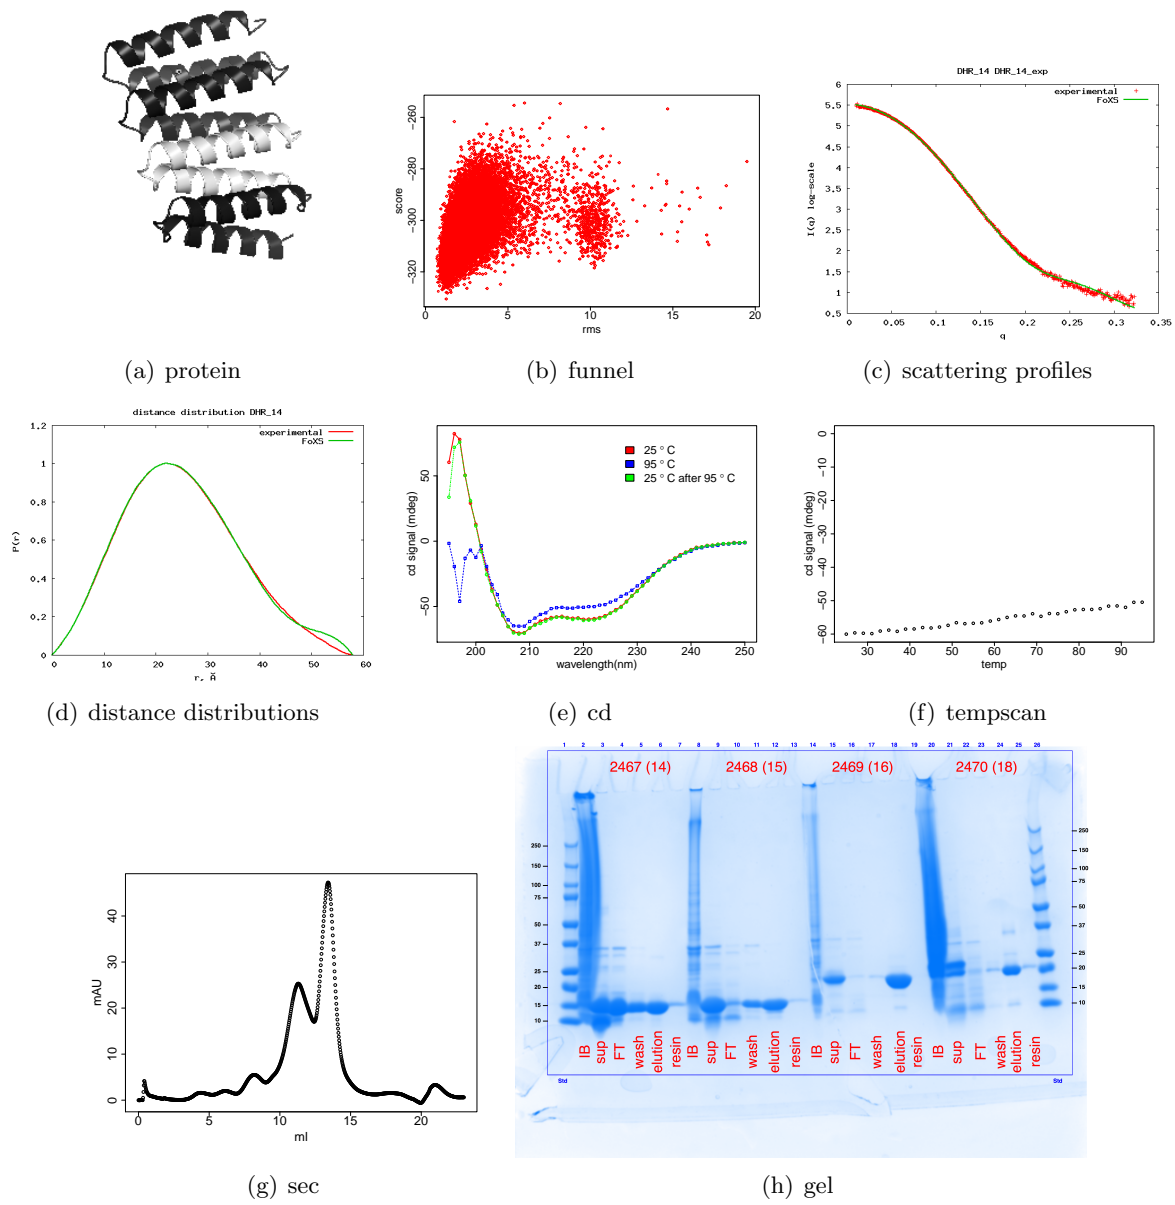

Figure 12: Protein : DHR14 labeled as 15 in gel.

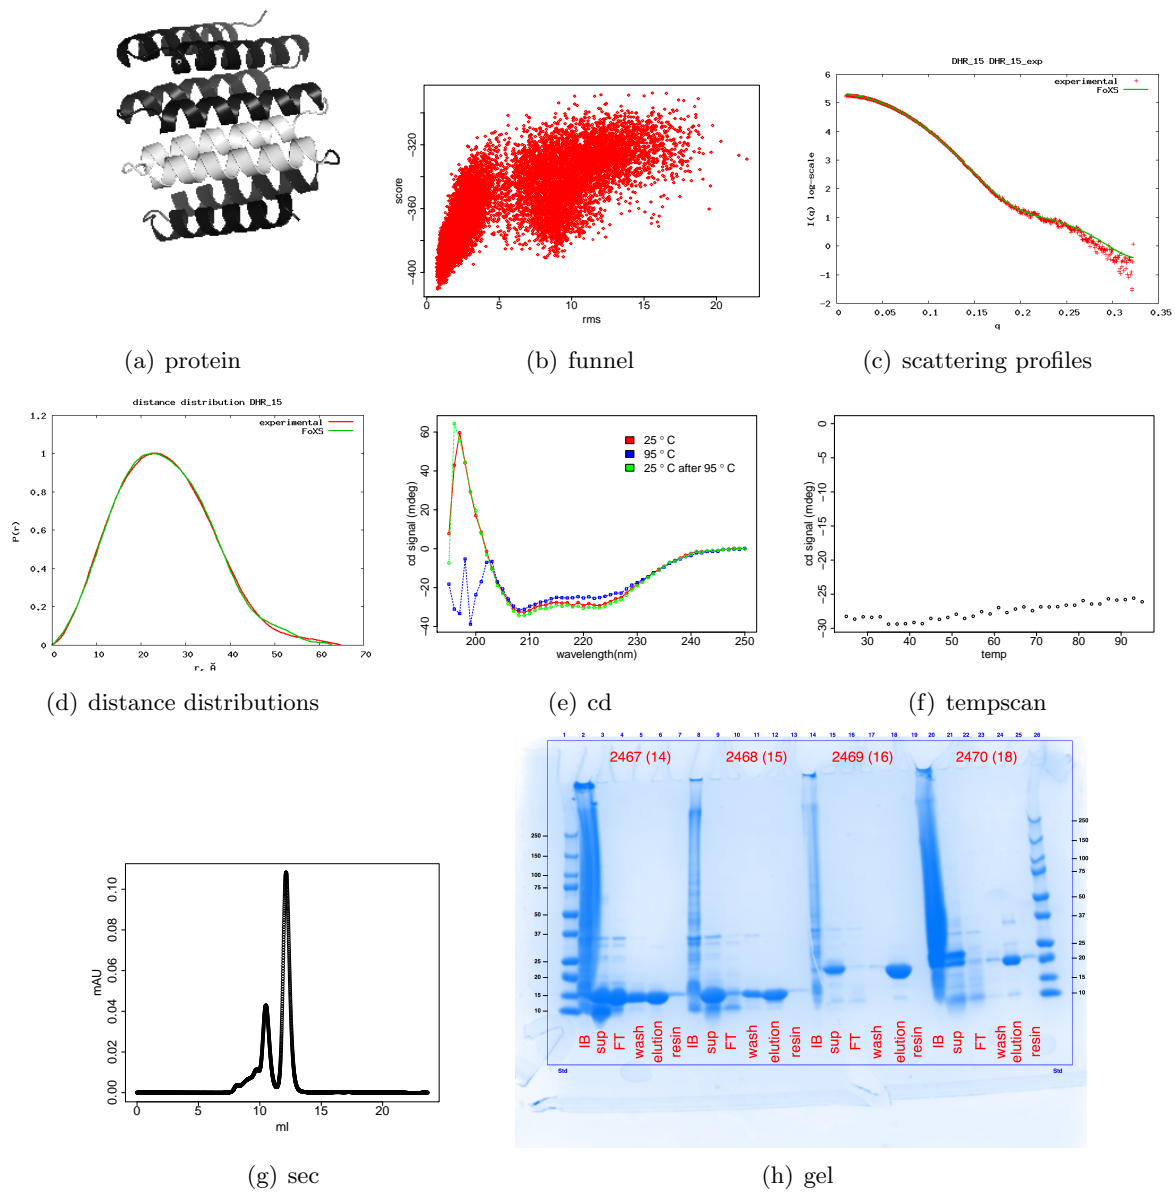

Figure 13: Protein : DHR15 labeled as 16 in gel.

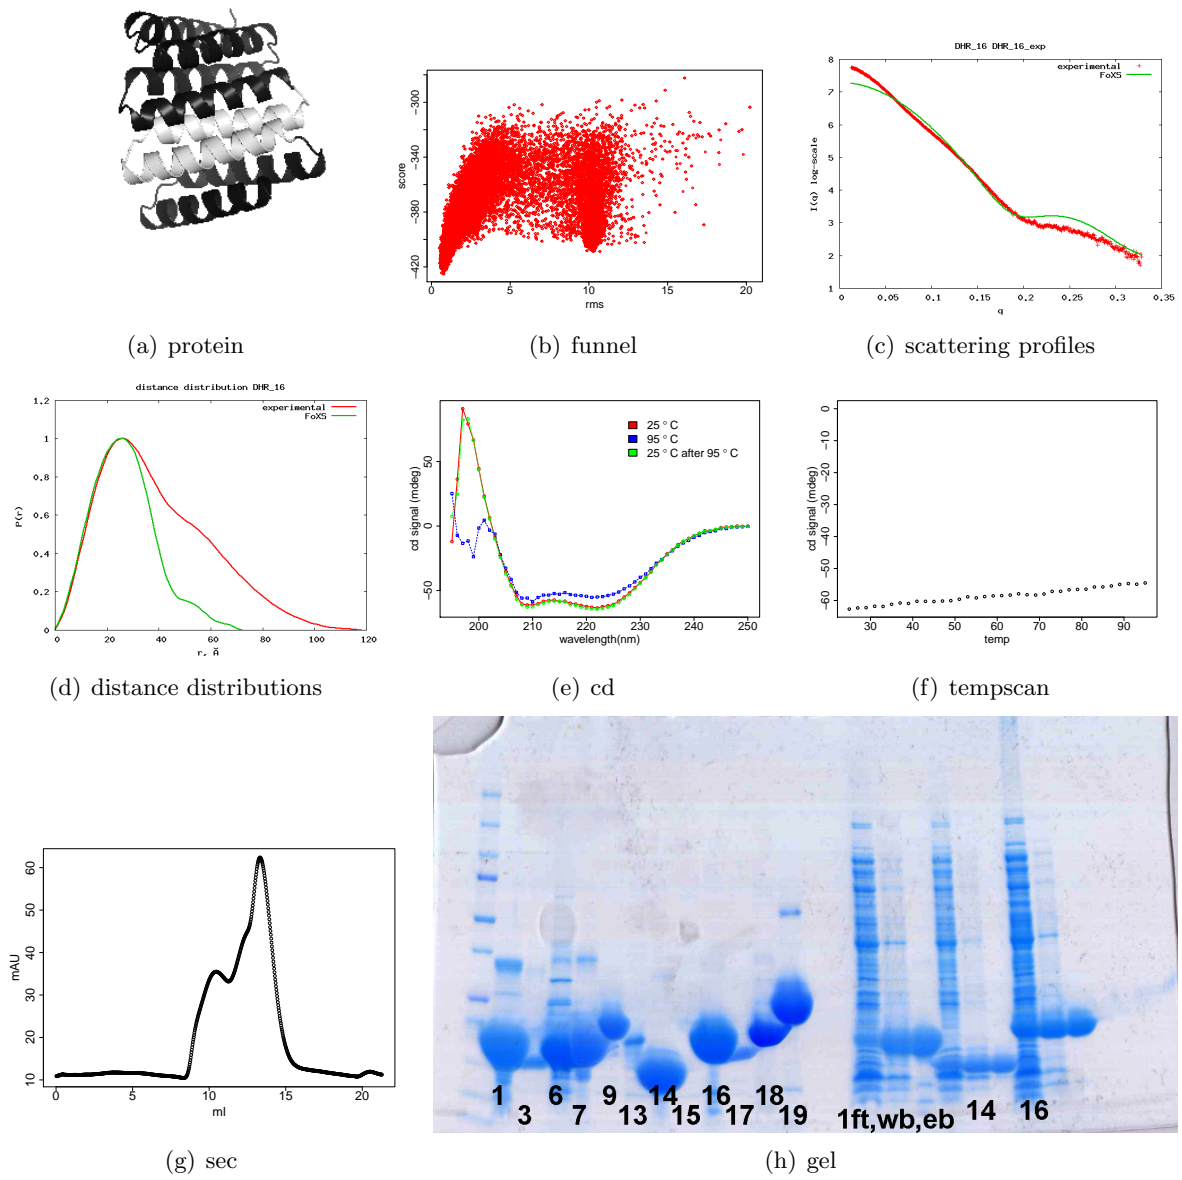

Figure 14: Protein : DHR16 labeled as 17 in gel.

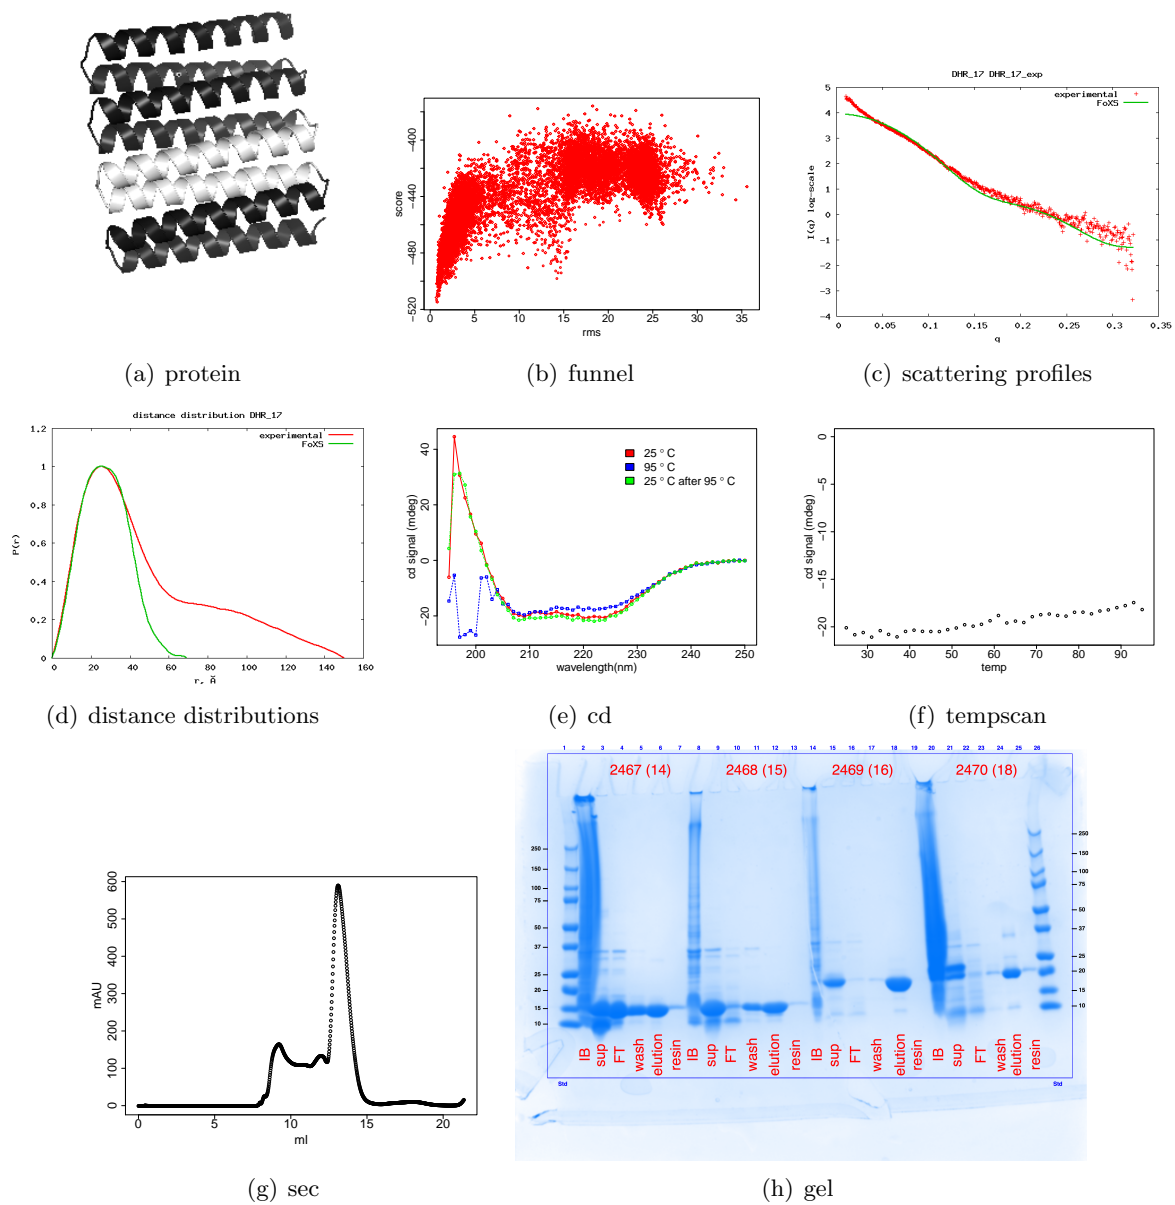

Figure 15: Protein : DHR17 labeled as 18 in gel.
