# Supplementary material
Source: PubMed Central journal article supplement (PMC4845728)
Supplement: NIHMS733599-supplement-supp_data2.pdf [file NIHMS733599-supplement-supp_data2.pdf]

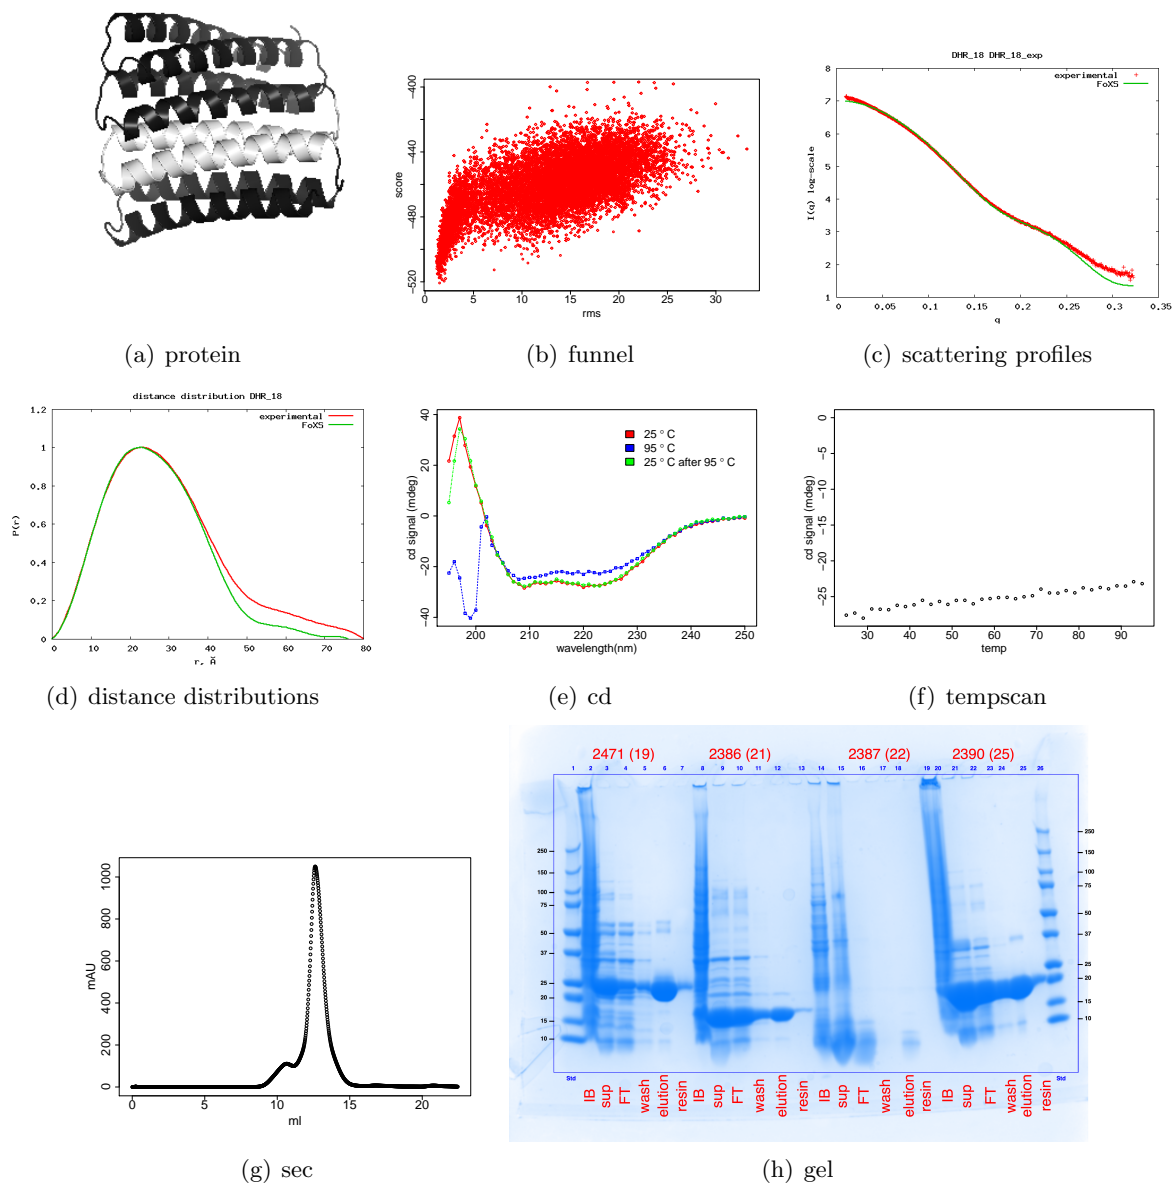

Figure 1: Protein : DHR18 labeled as 19 in gel.

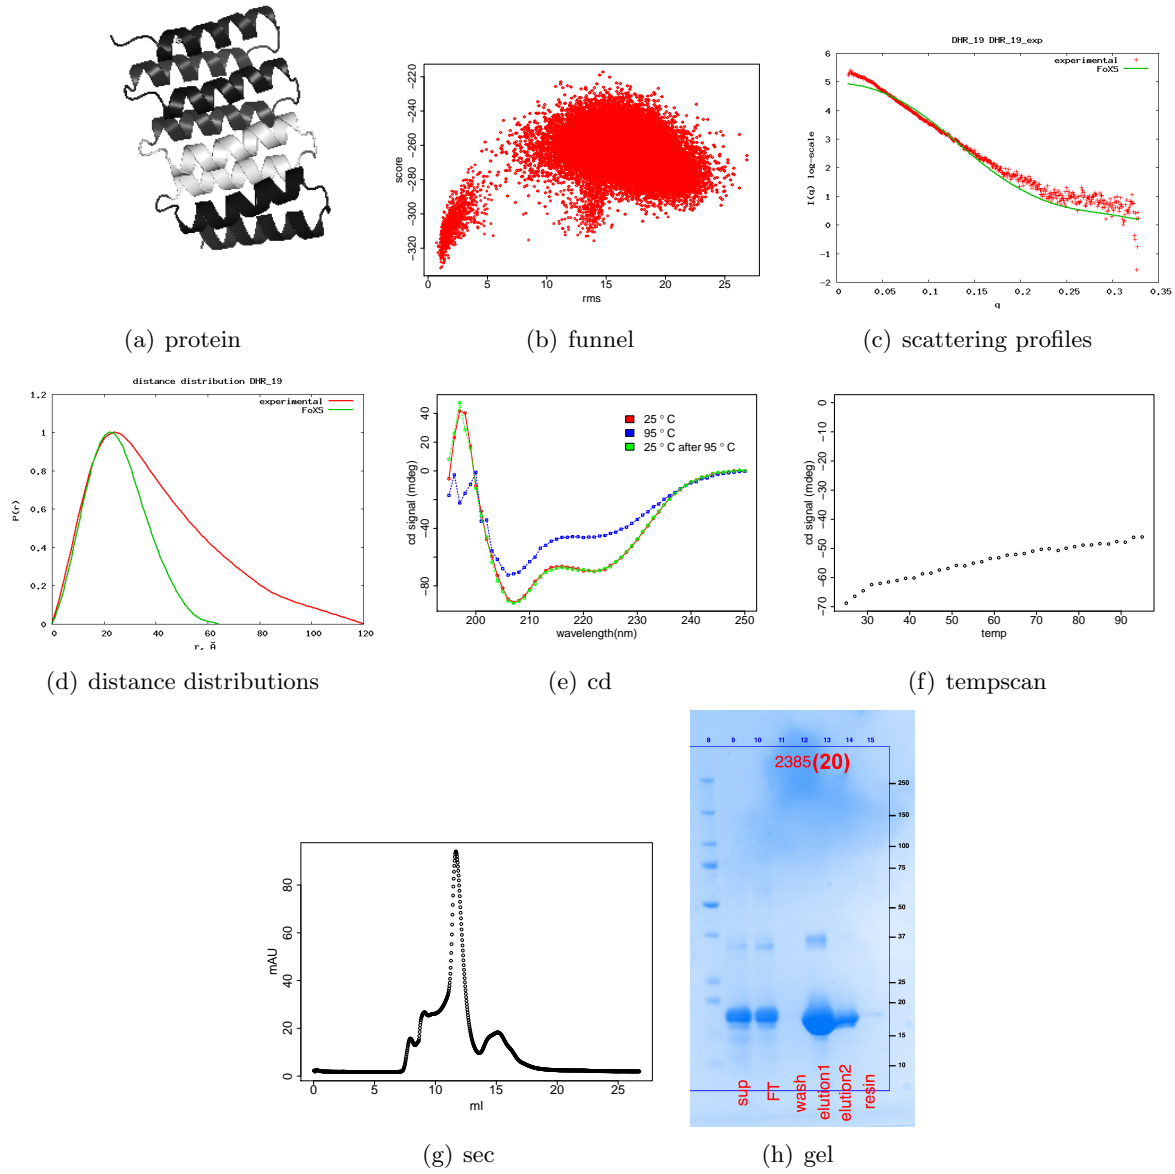

Figure 2: Protein : DHR19 labeled as 20 in gel.

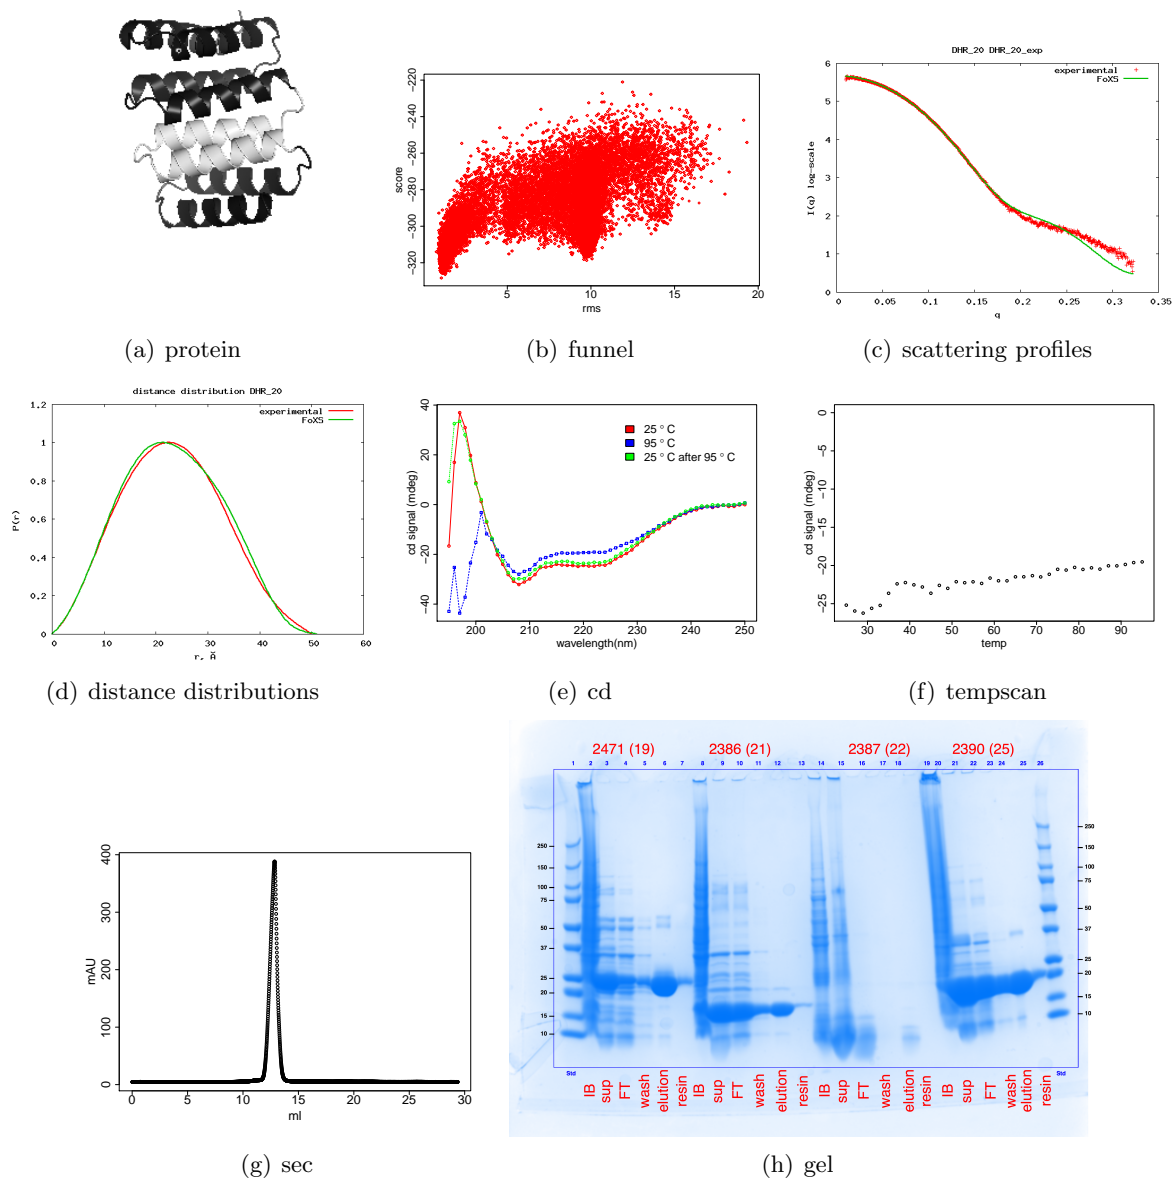

Figure 3: Protein : DHR20 labeled as 21 in gel.

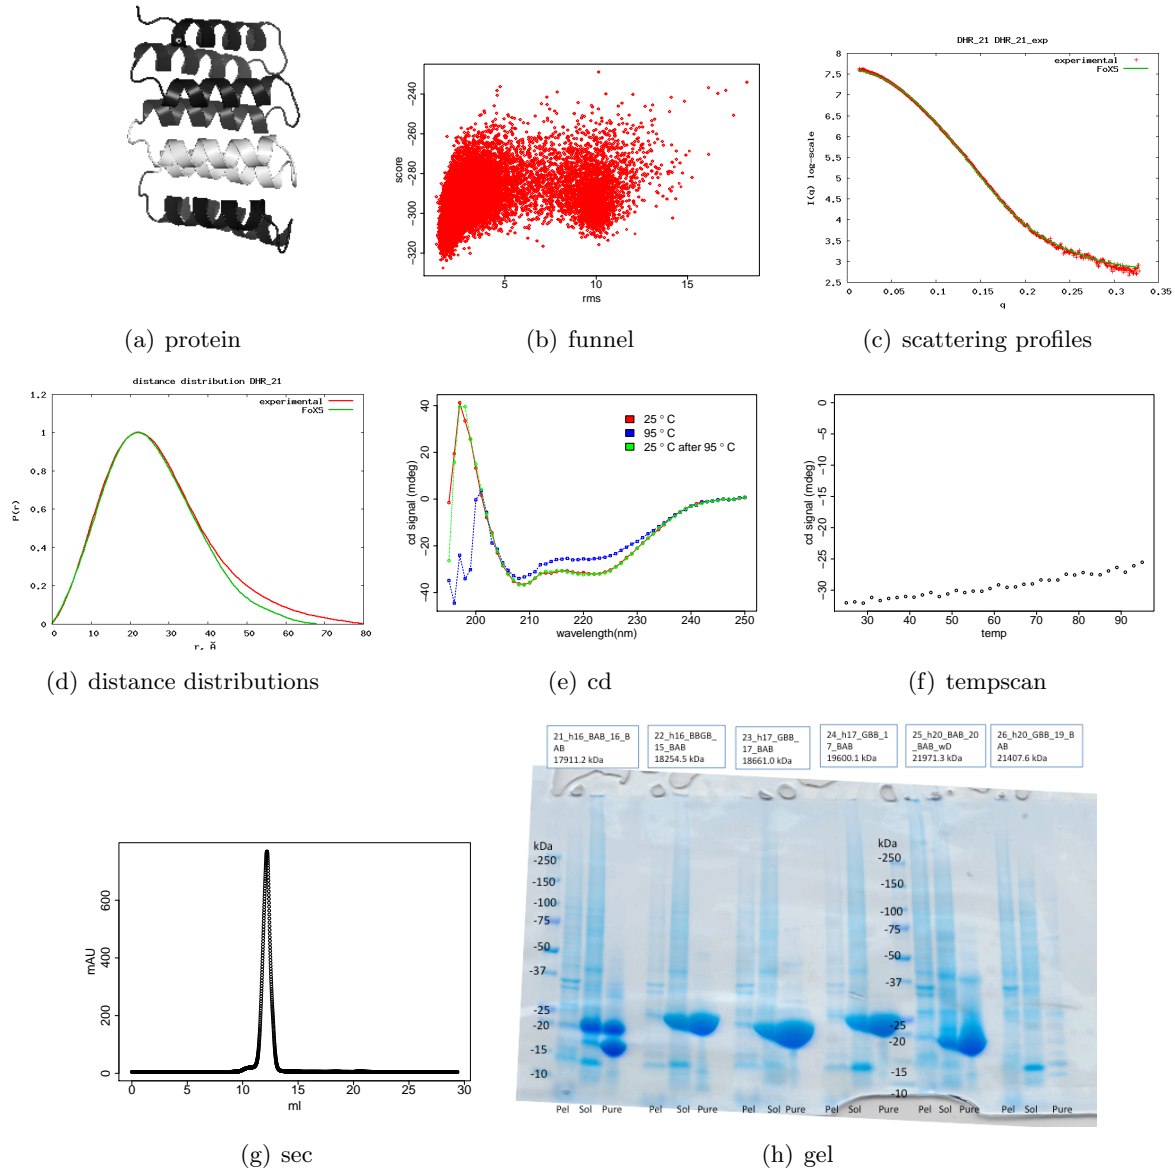

Figure 4: Protein : DHR21 labeled as 22 in gel.



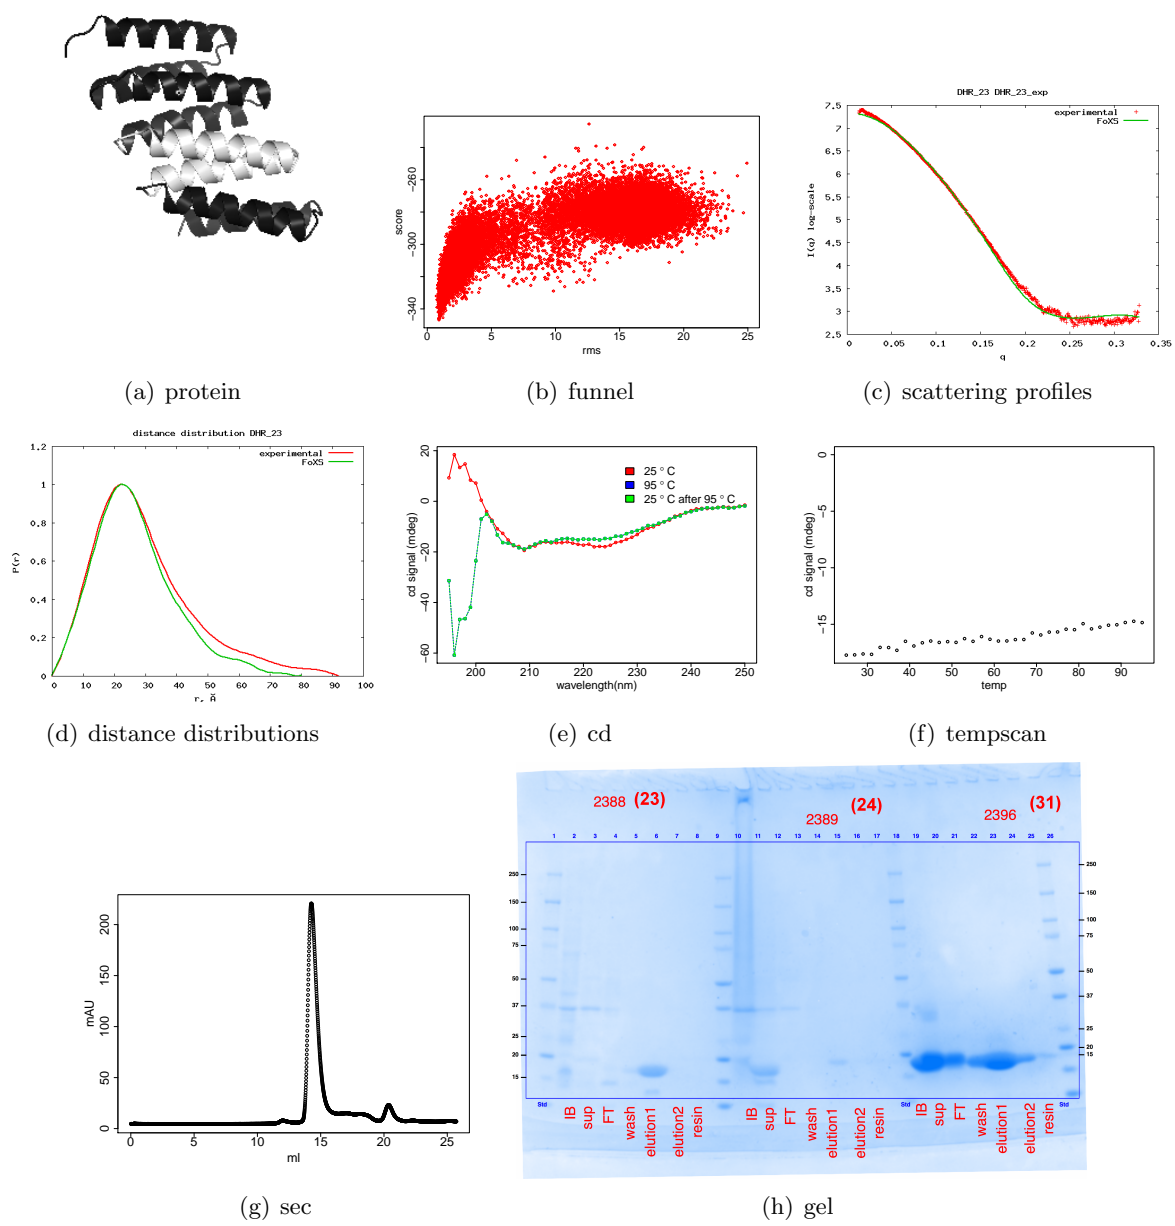

Figure 5: Protein : DHR23 labeled as 24 in gel.

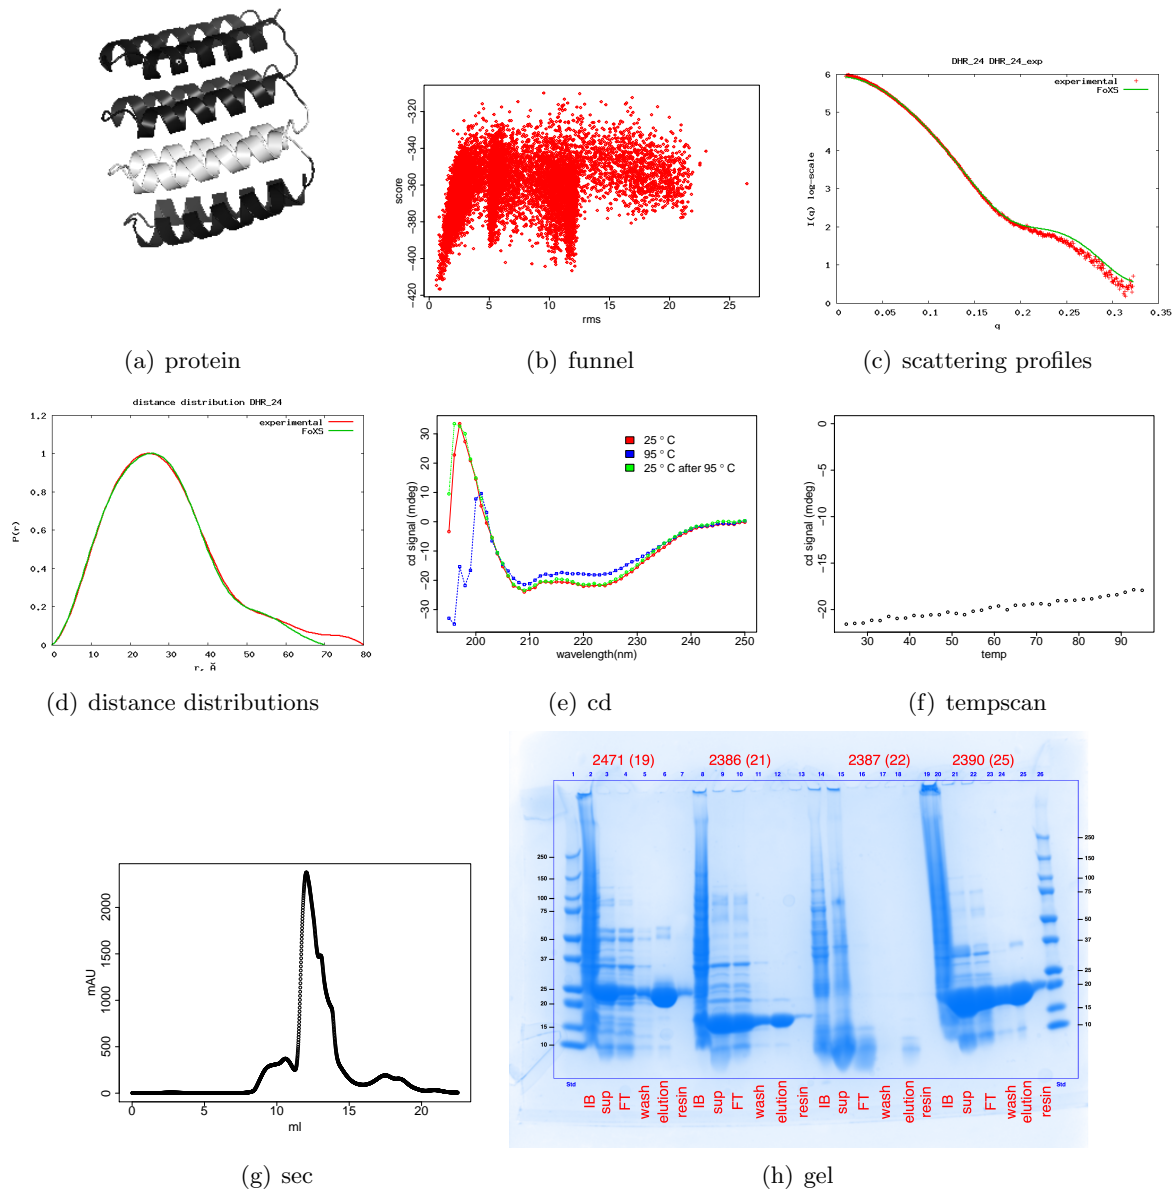

Figure 6: Protein : DHR24 labeled as 25 in gel.

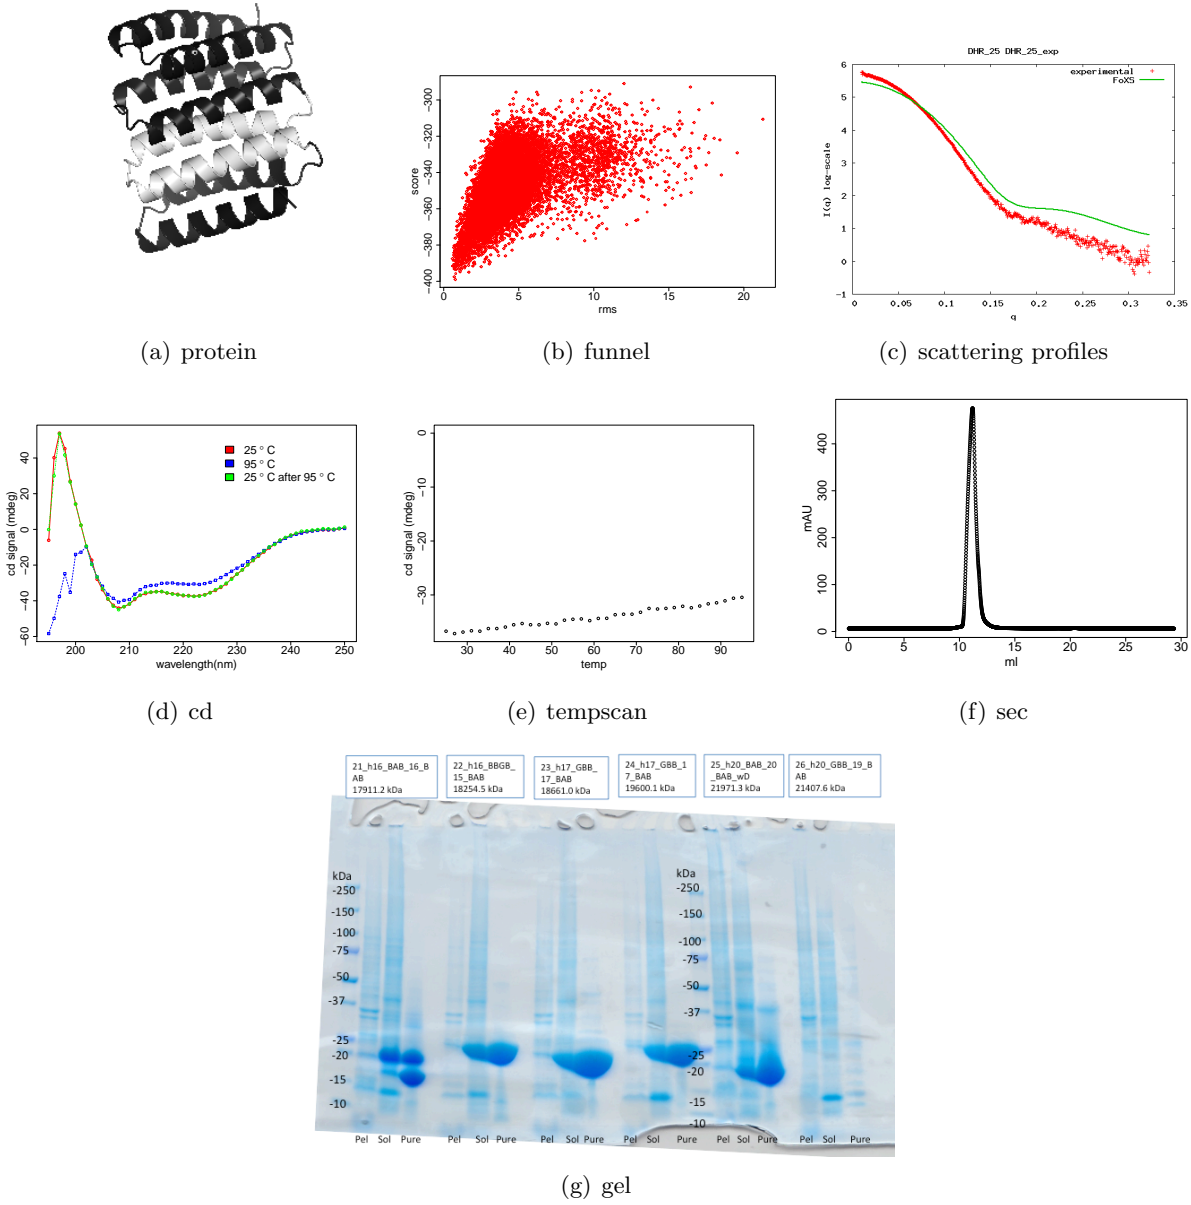

Figure 7: Protein : DHR25 labeled as 26 in gel.

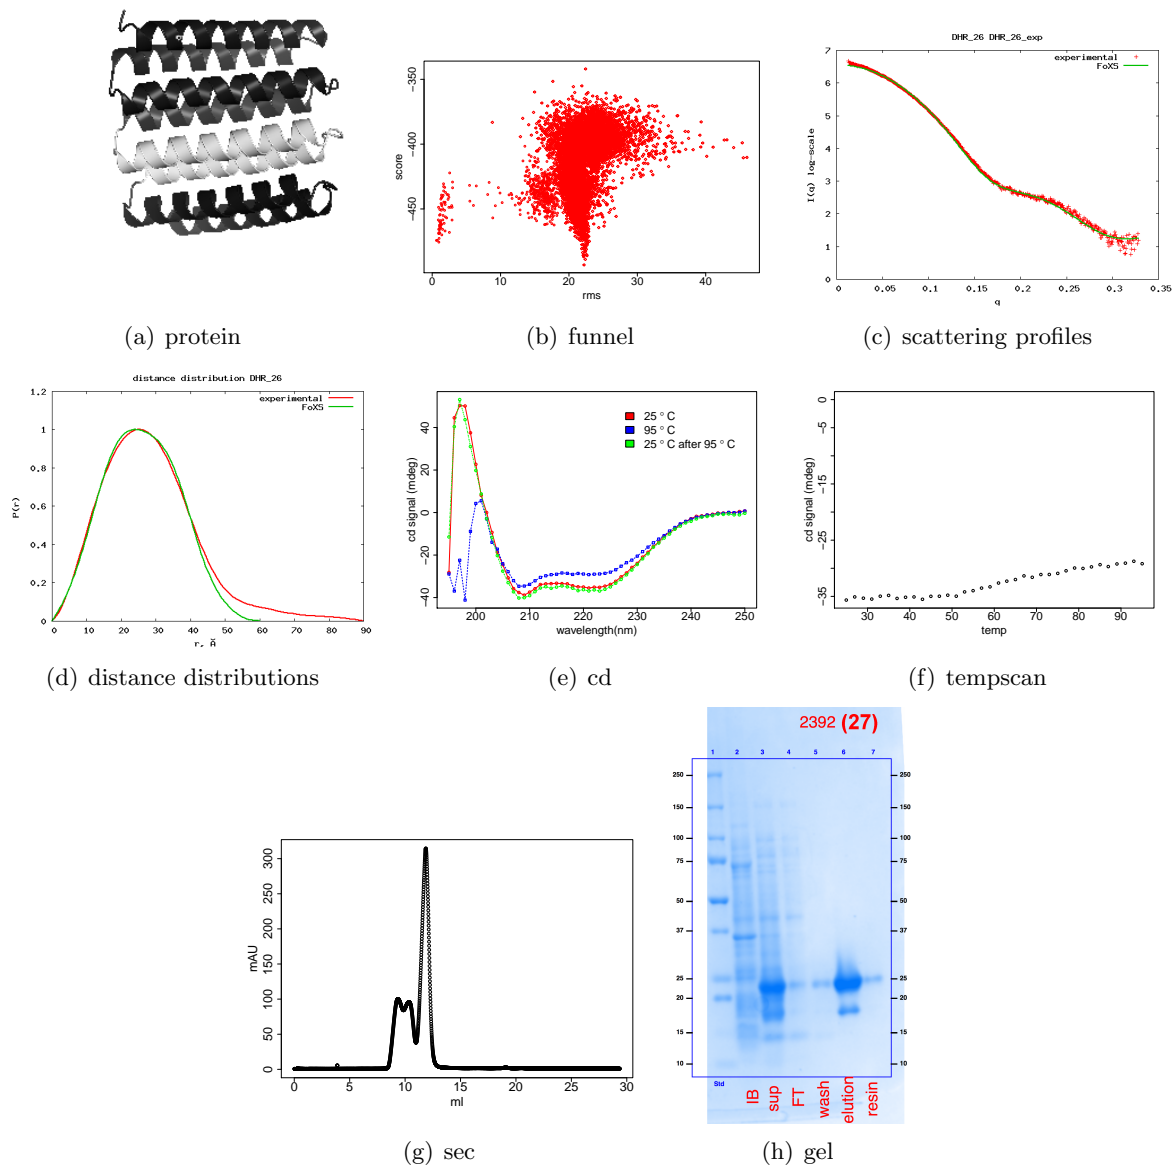

Figure 8: Protein : DHR26 labeled as 27 in gel. Note: After disulfides are added the protein sometimes do not forward fold as seen in figure B.

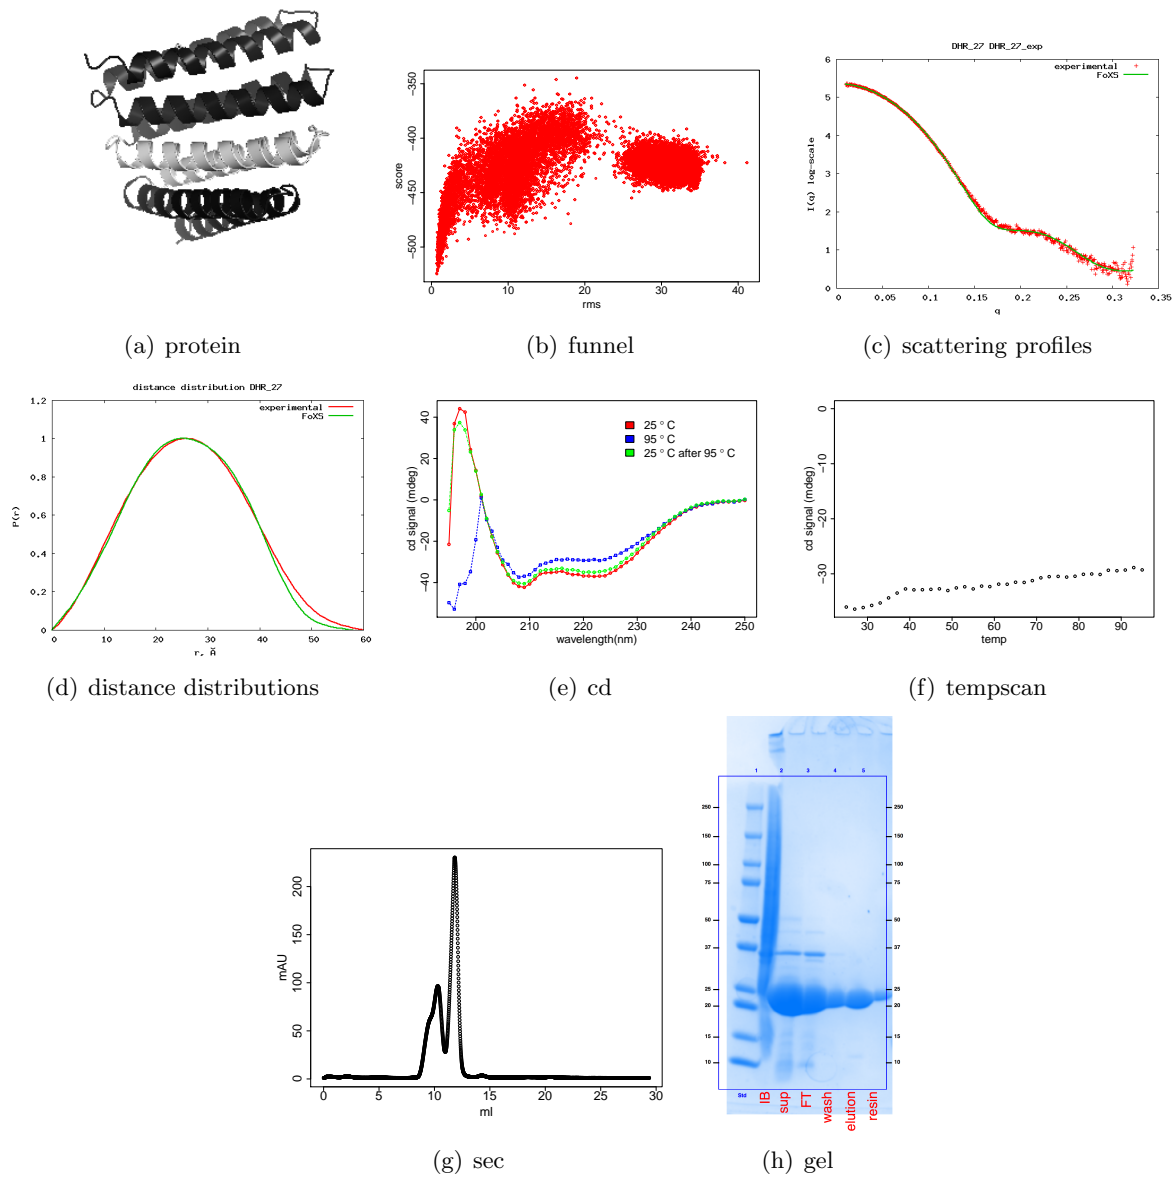

Figure 9: Protein : DHR27 labeled as 28 in gel.

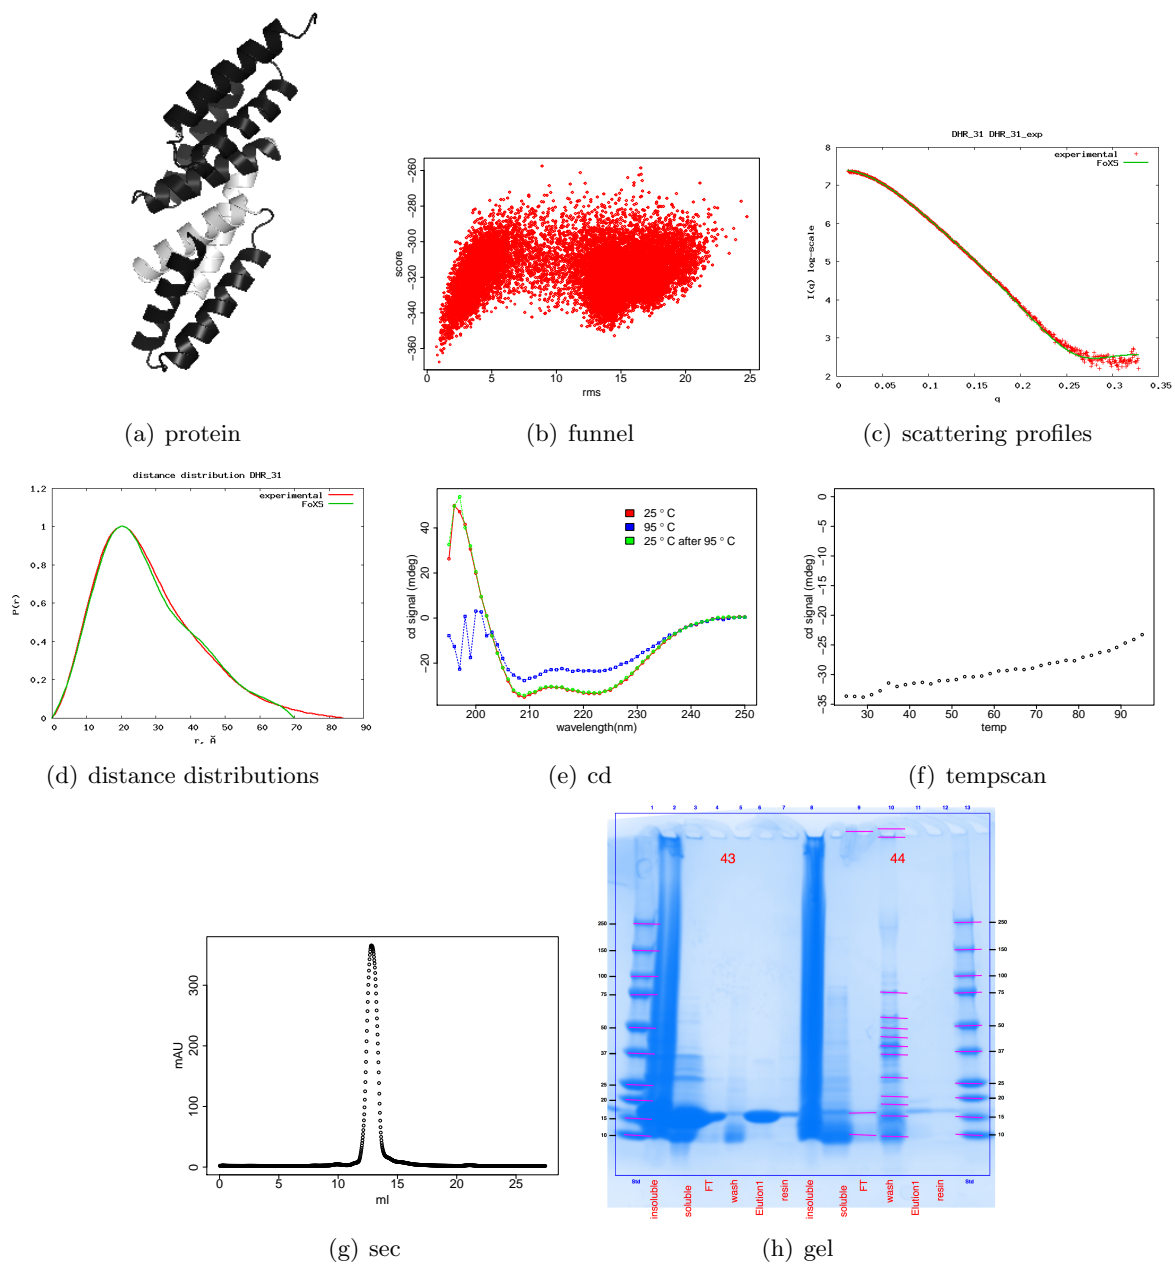

Figure 10: Protein : DHR31 labeled as 43 in gel.

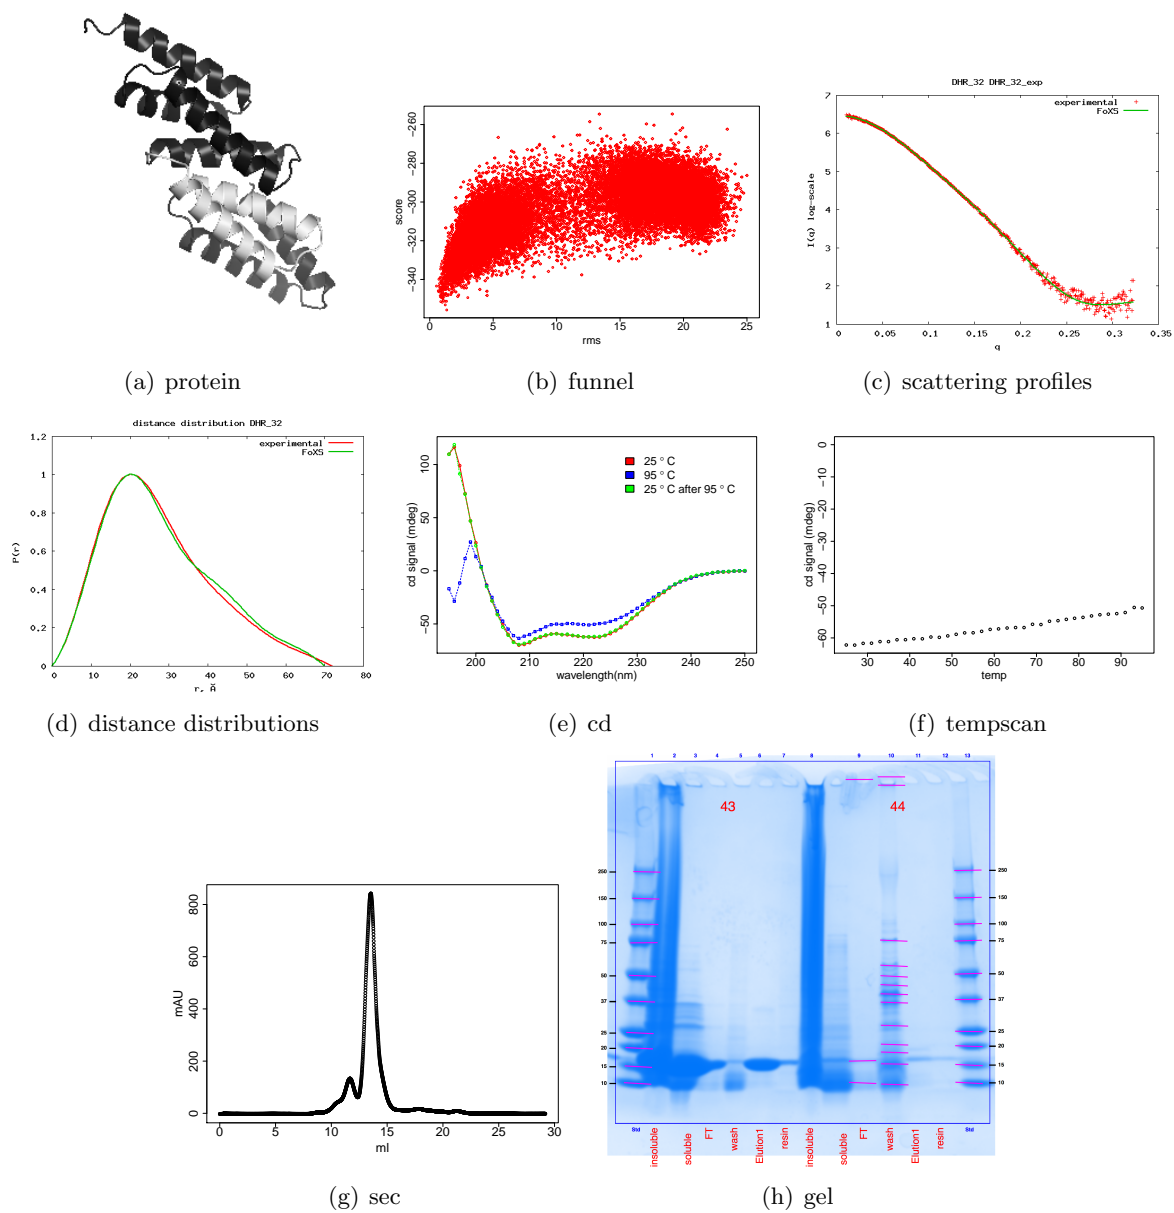

Figure 11: Protein : DHR32 labeled as 44 in gel.
