# Supplementary material
Source: PubMed Central journal article supplement (PMC4845728)
Supplement: NIHMS733599-supplement-supp_data3.pdf [file NIHMS733599-supplement-supp_data3.pdf]

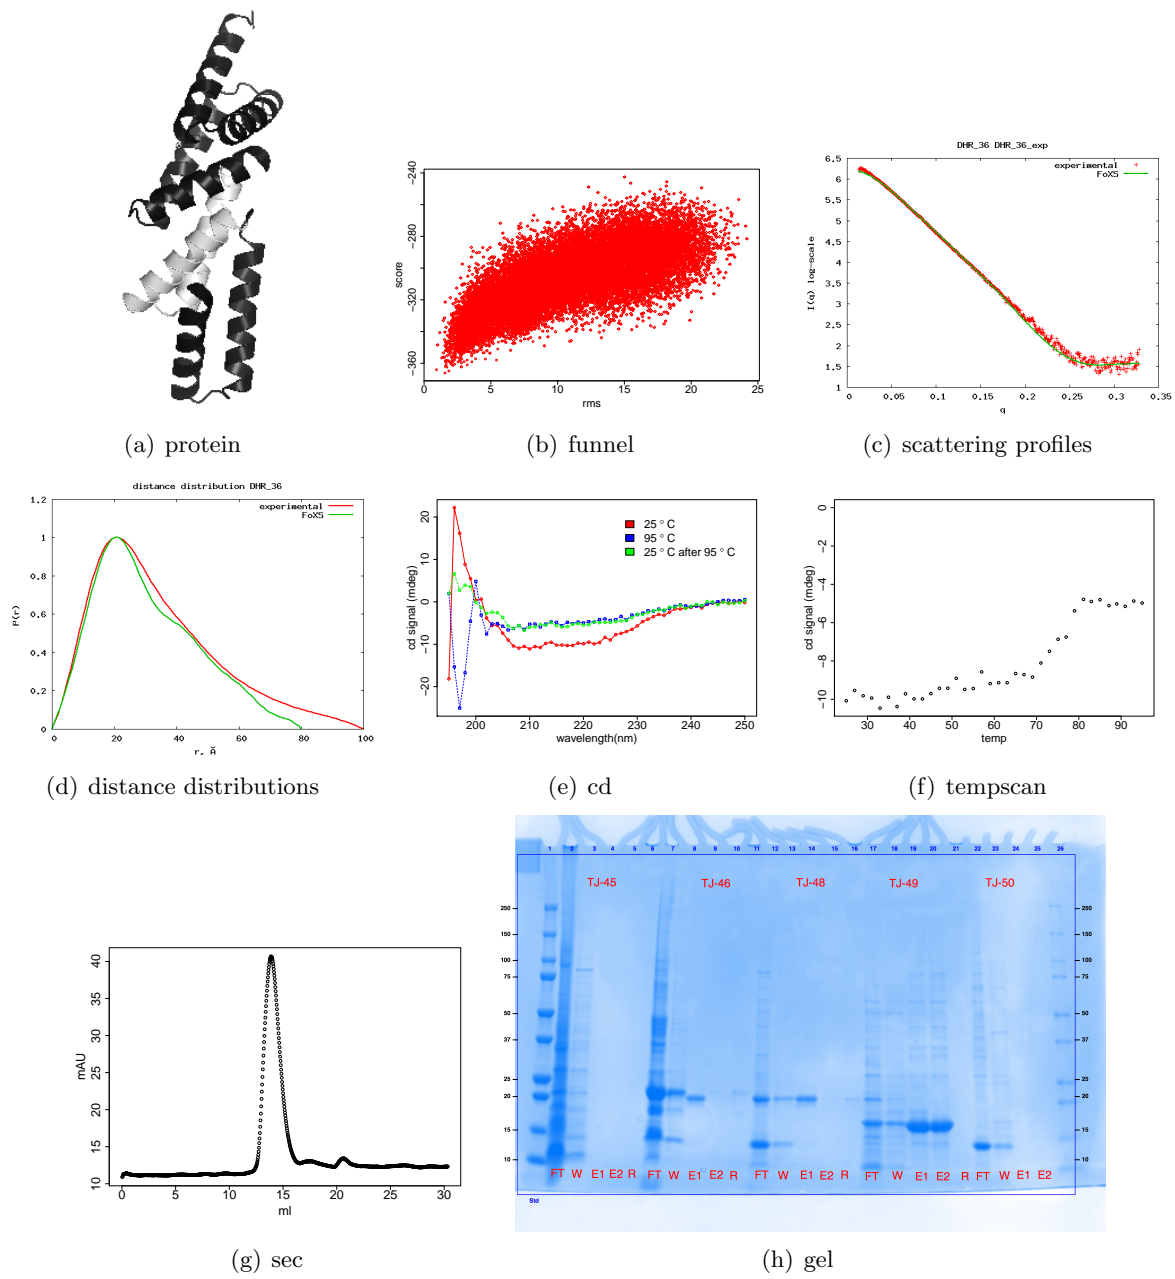

Figure 1: Protein : DHR36 labeled as 48 in gel.

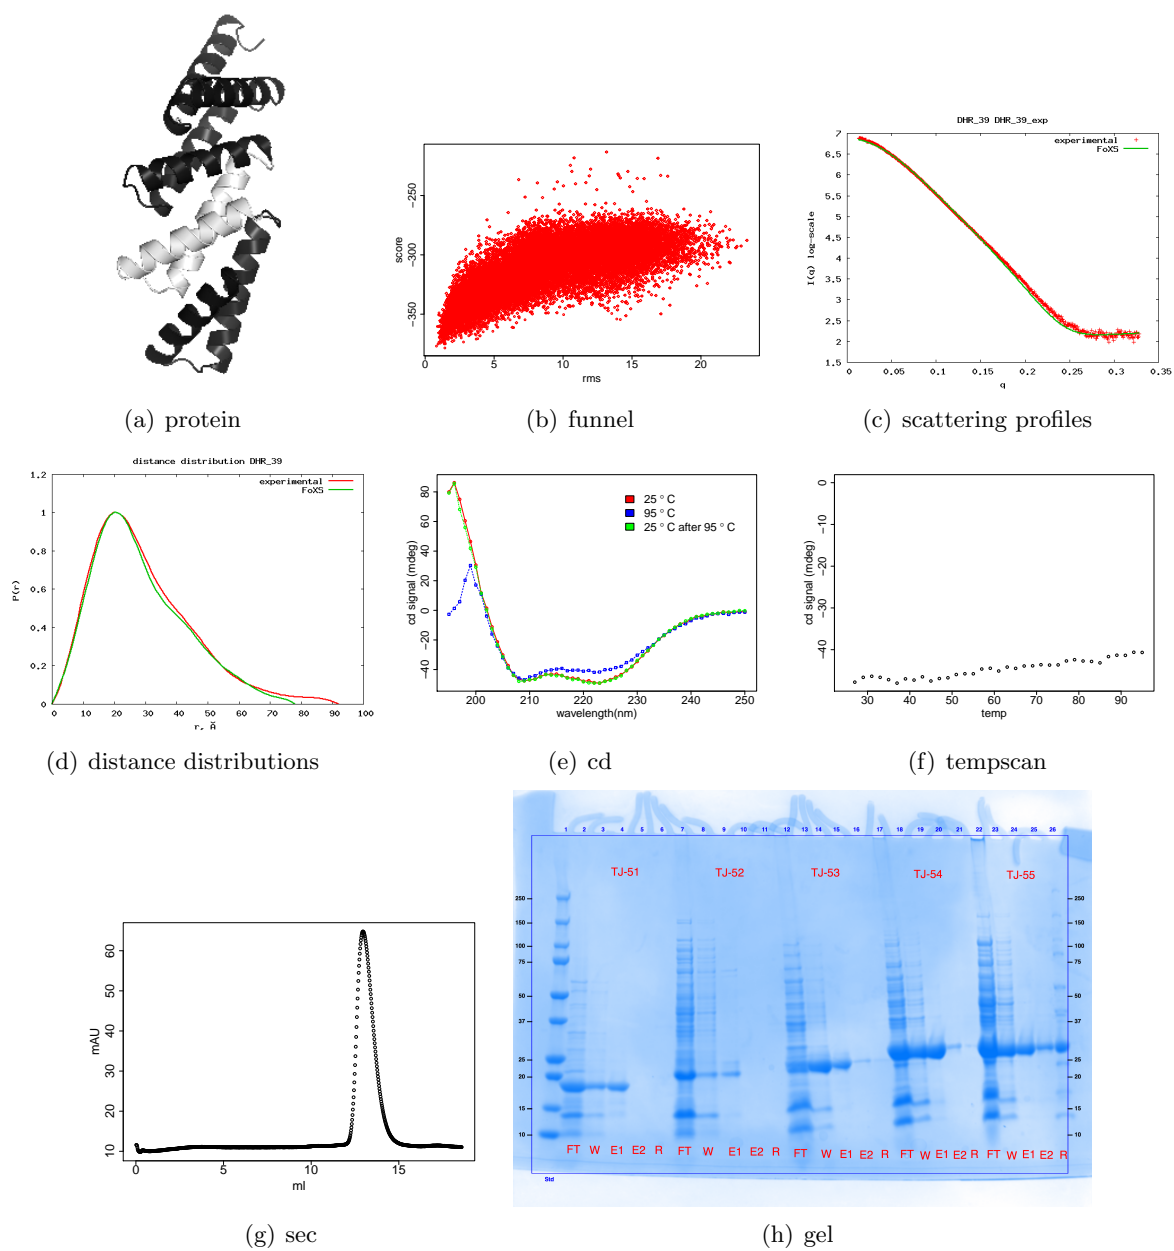

Figure 2: Protein : DHR39 labeled as 51 in gel.

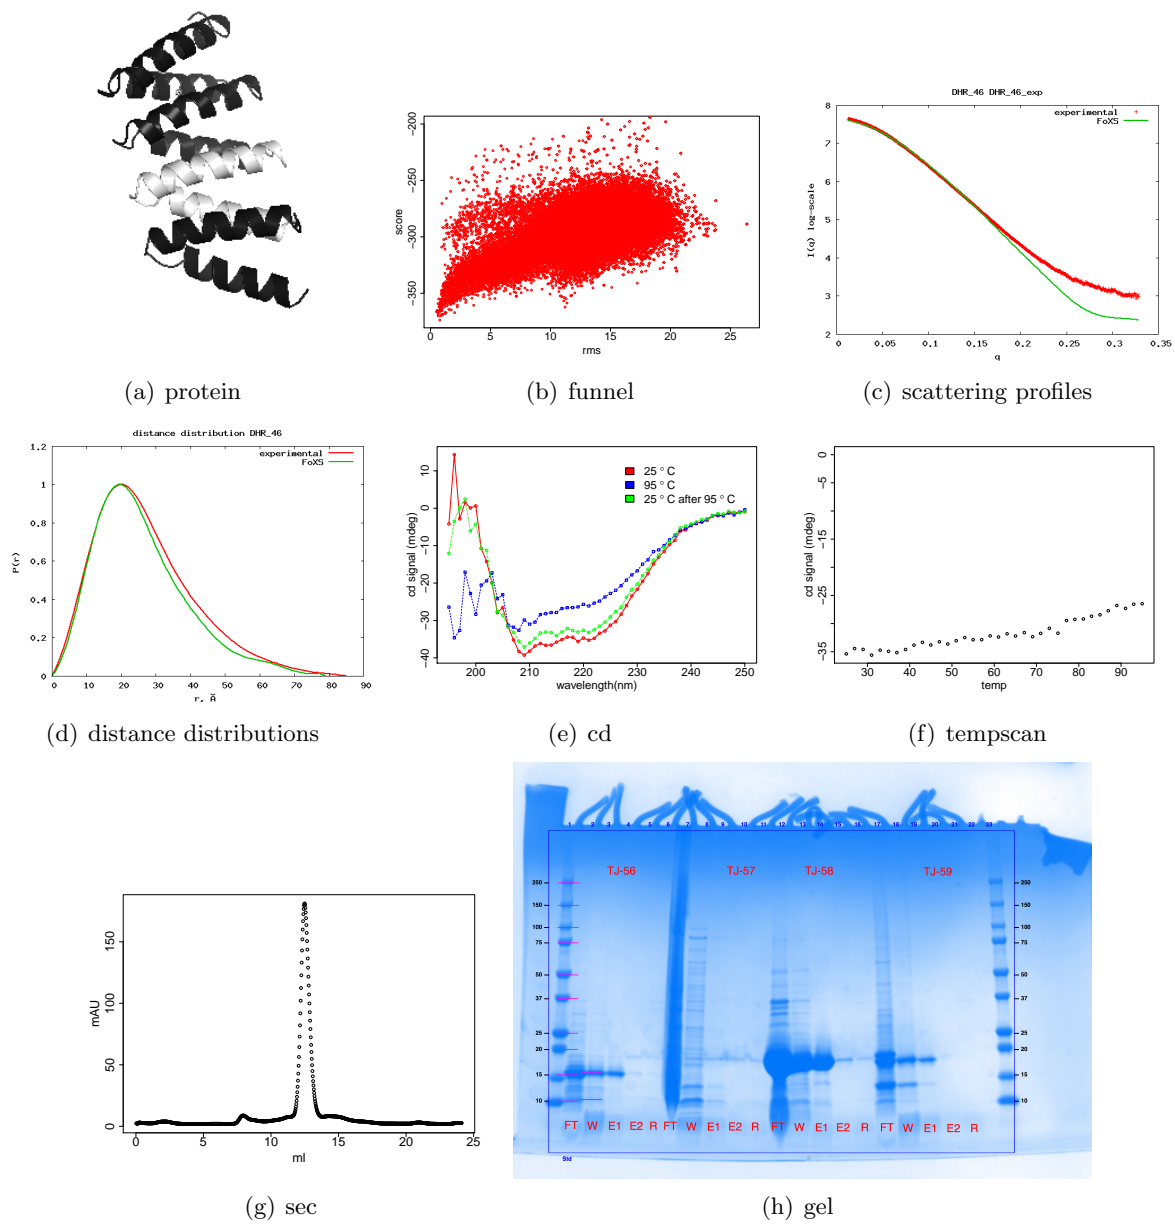

Figure 3: Protein : DHR46 labeled as 58 in gel.

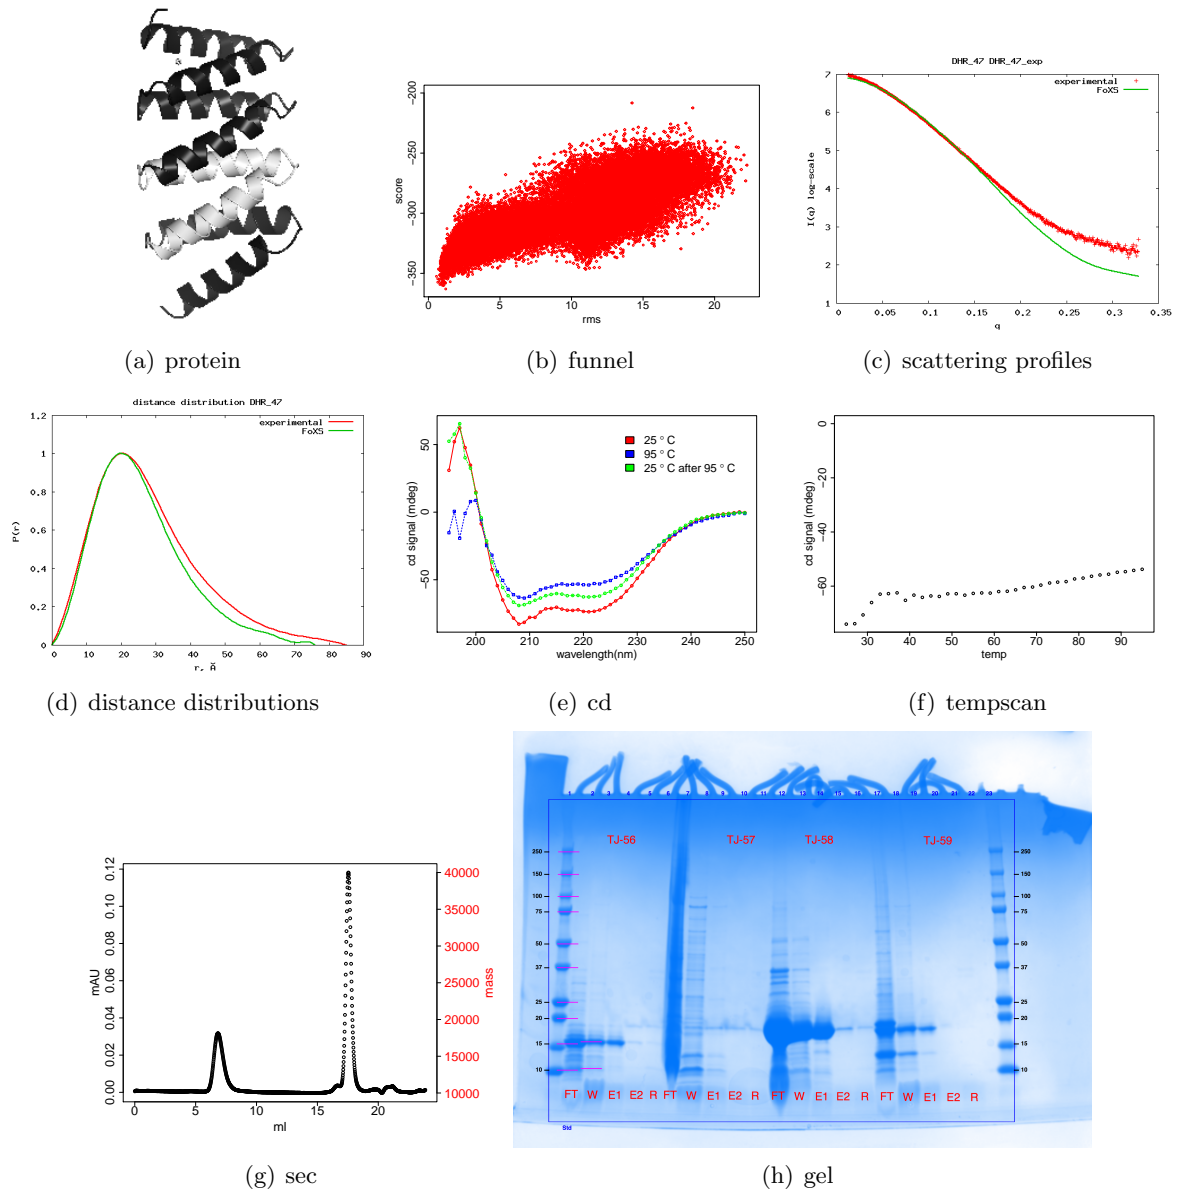

Figure 4: Protein : DHR47 labeled as 59 in gel.

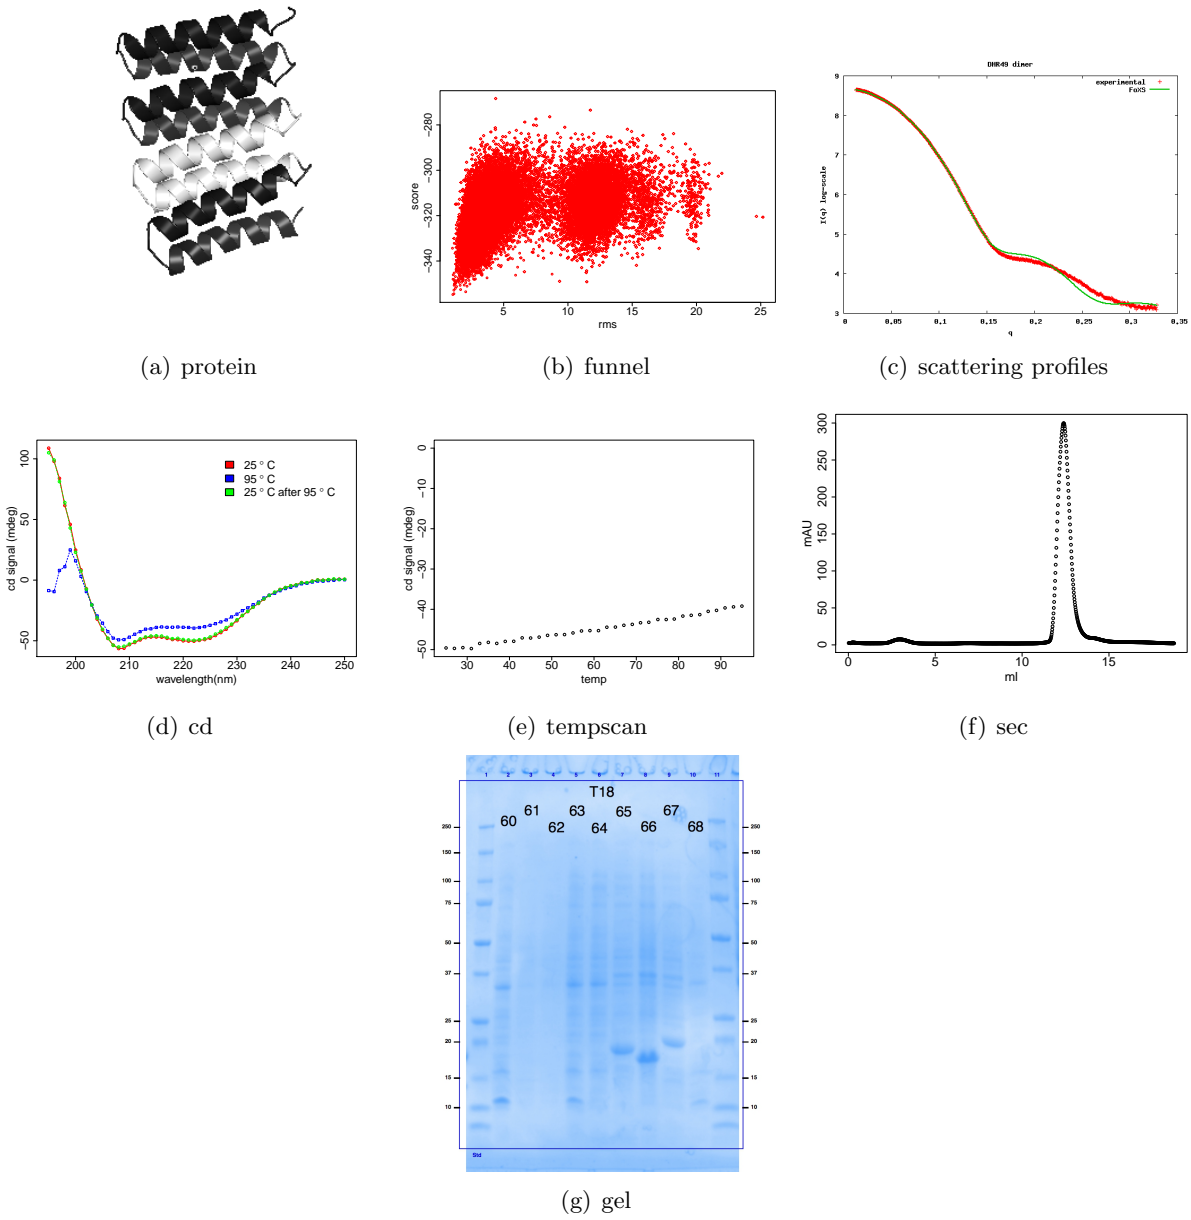

Figure 5: Protein : DHR49 labeled as 61 in gel.

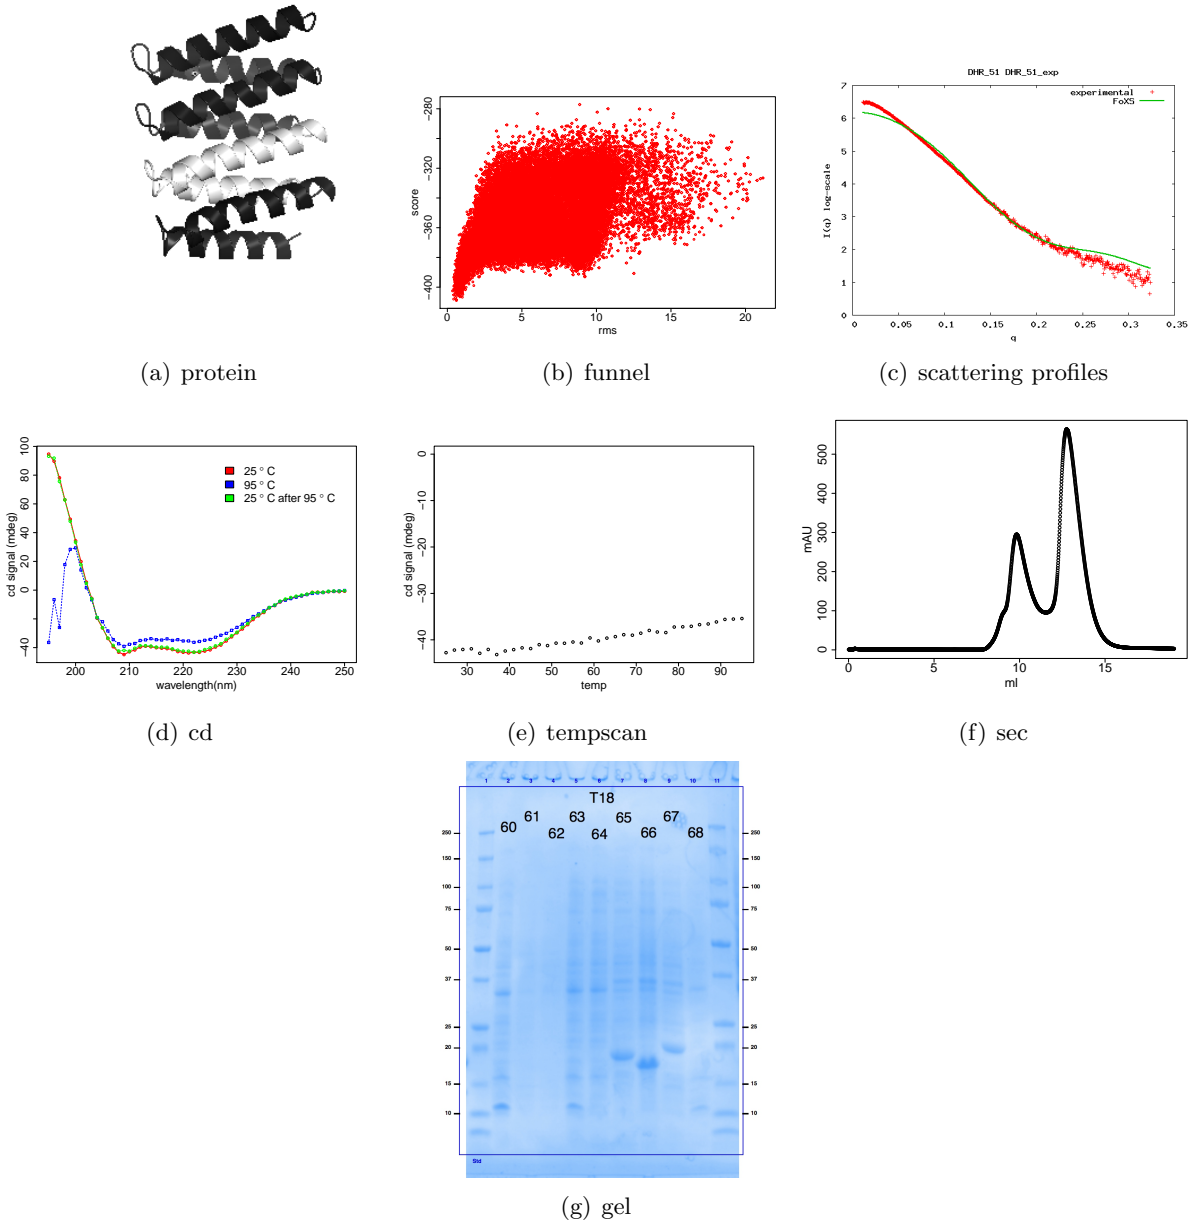

Figure 6: Protein : DHR51 labeled as 63 in gel.

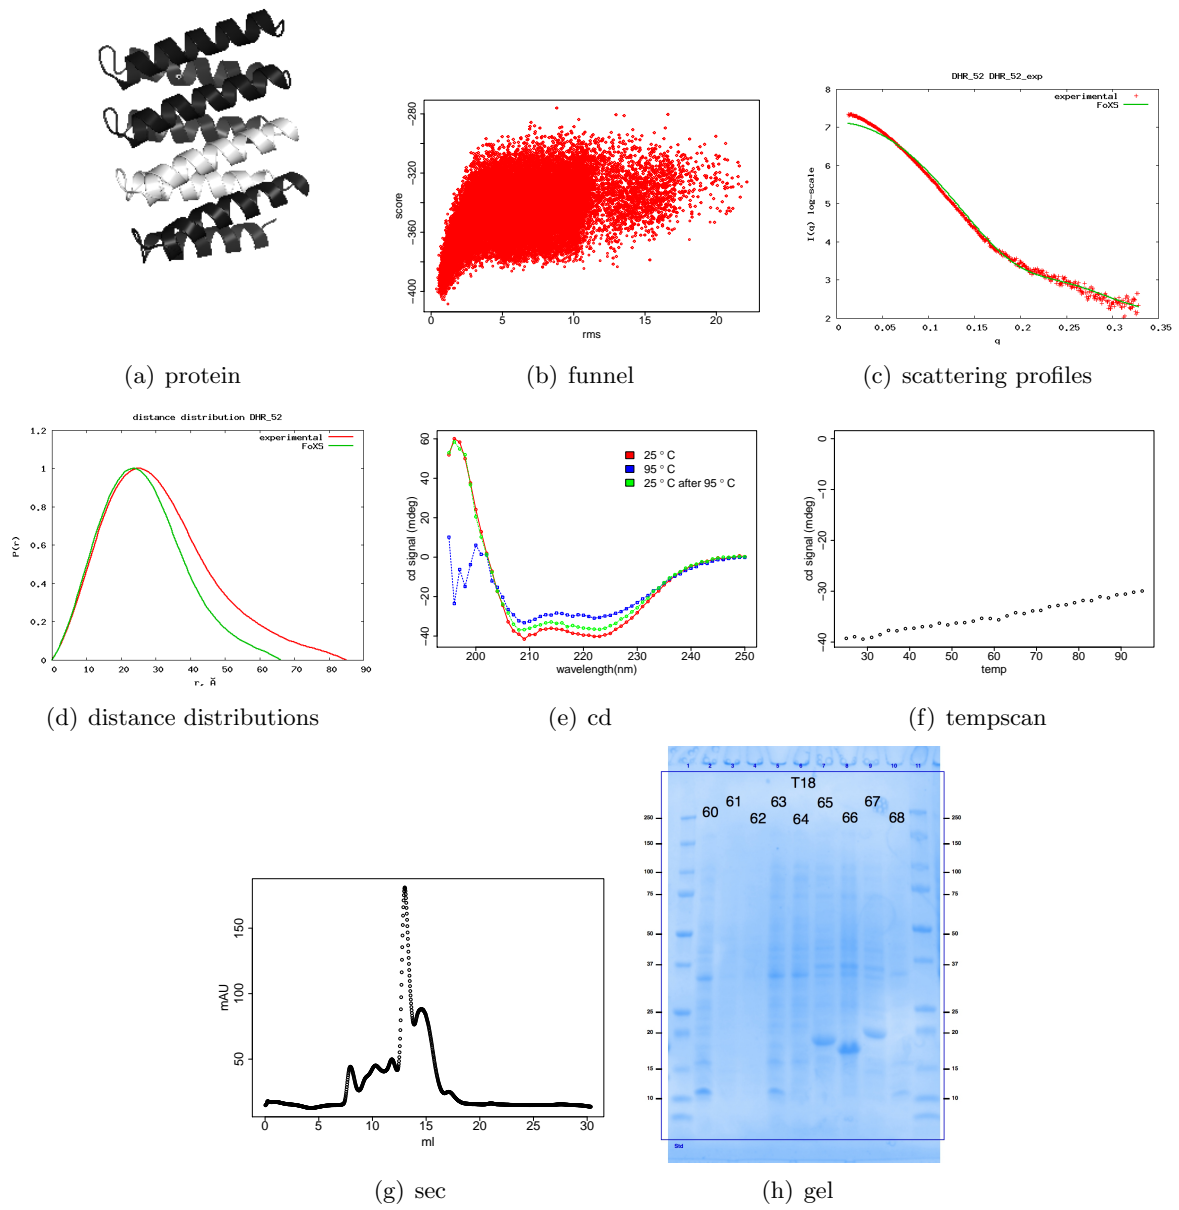

Figure 7: Protein : DHR52 labeled as 64 in gel.

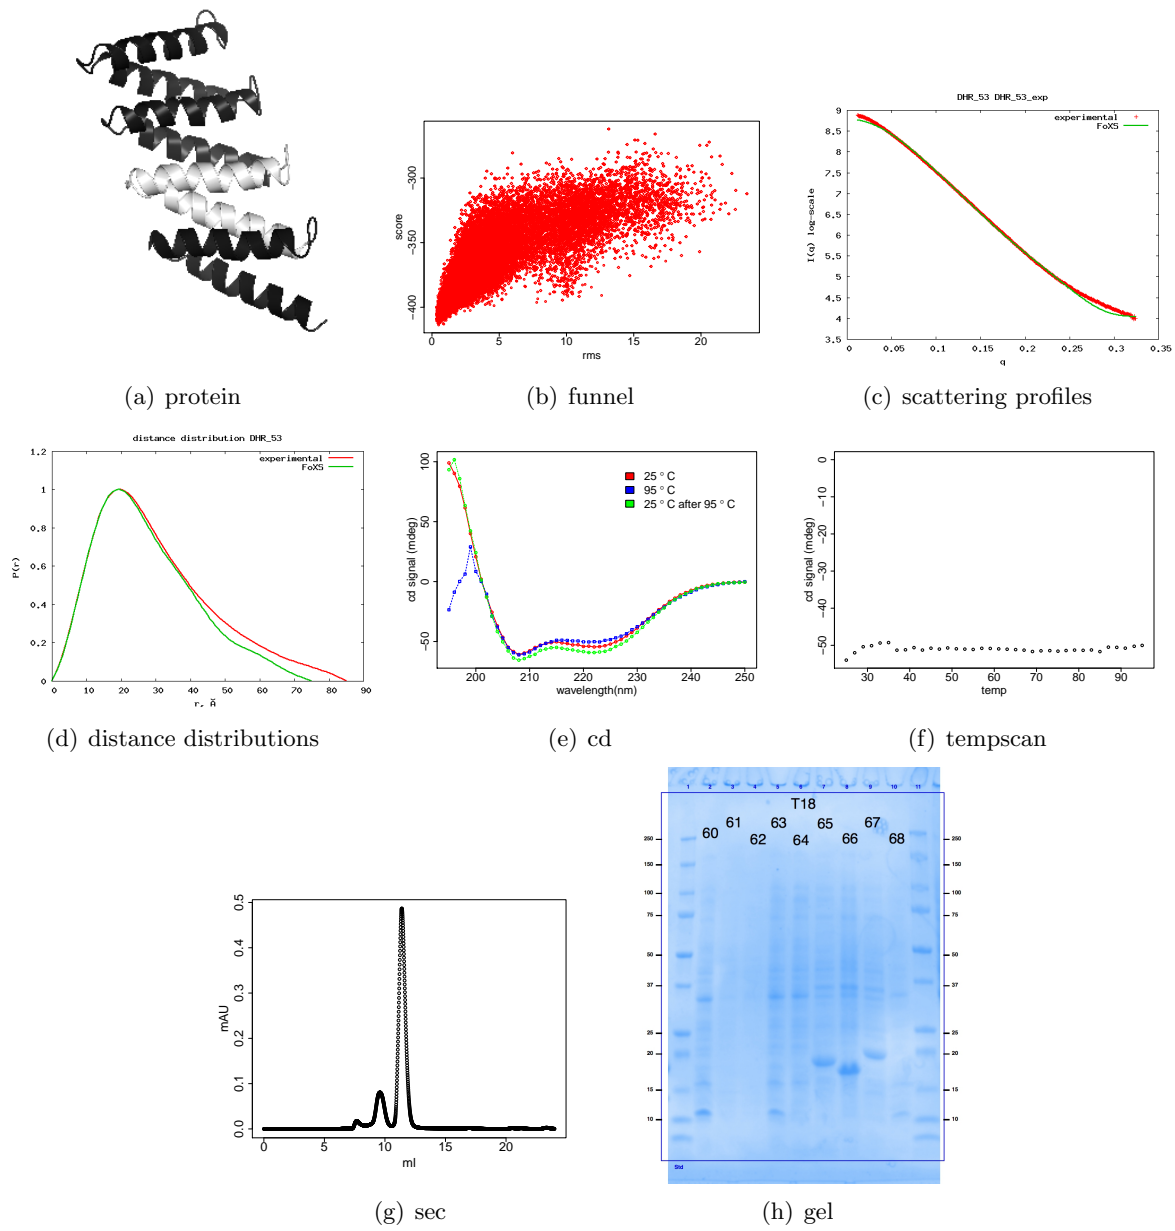

Figure 8: Protein : DHR53 labeled as 65 in gel.



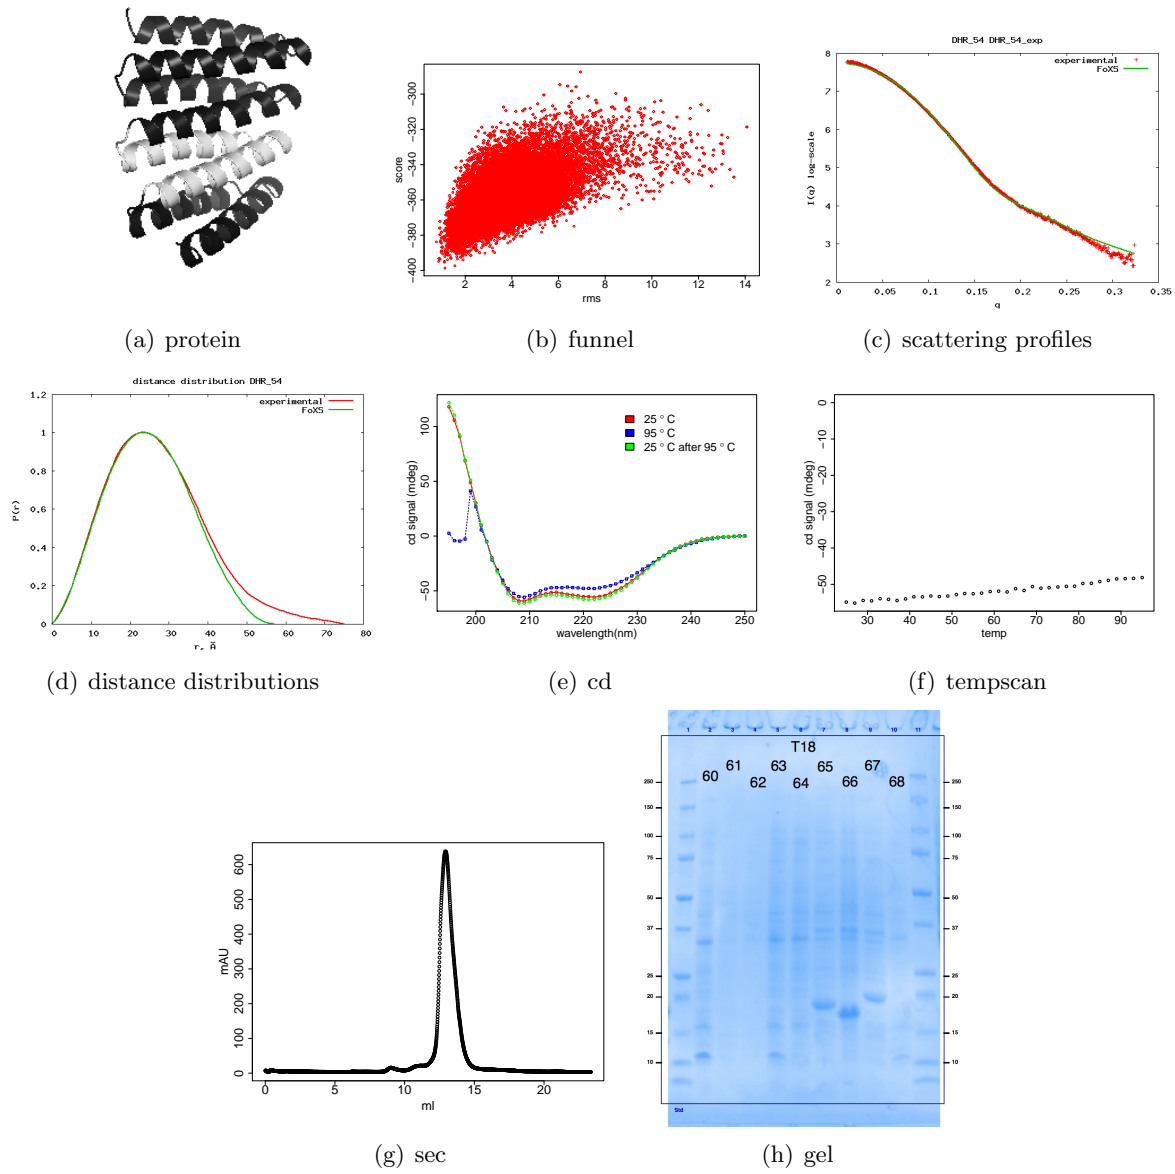

Figure 9: Protein : DHR54 labeled as 66 in gel.

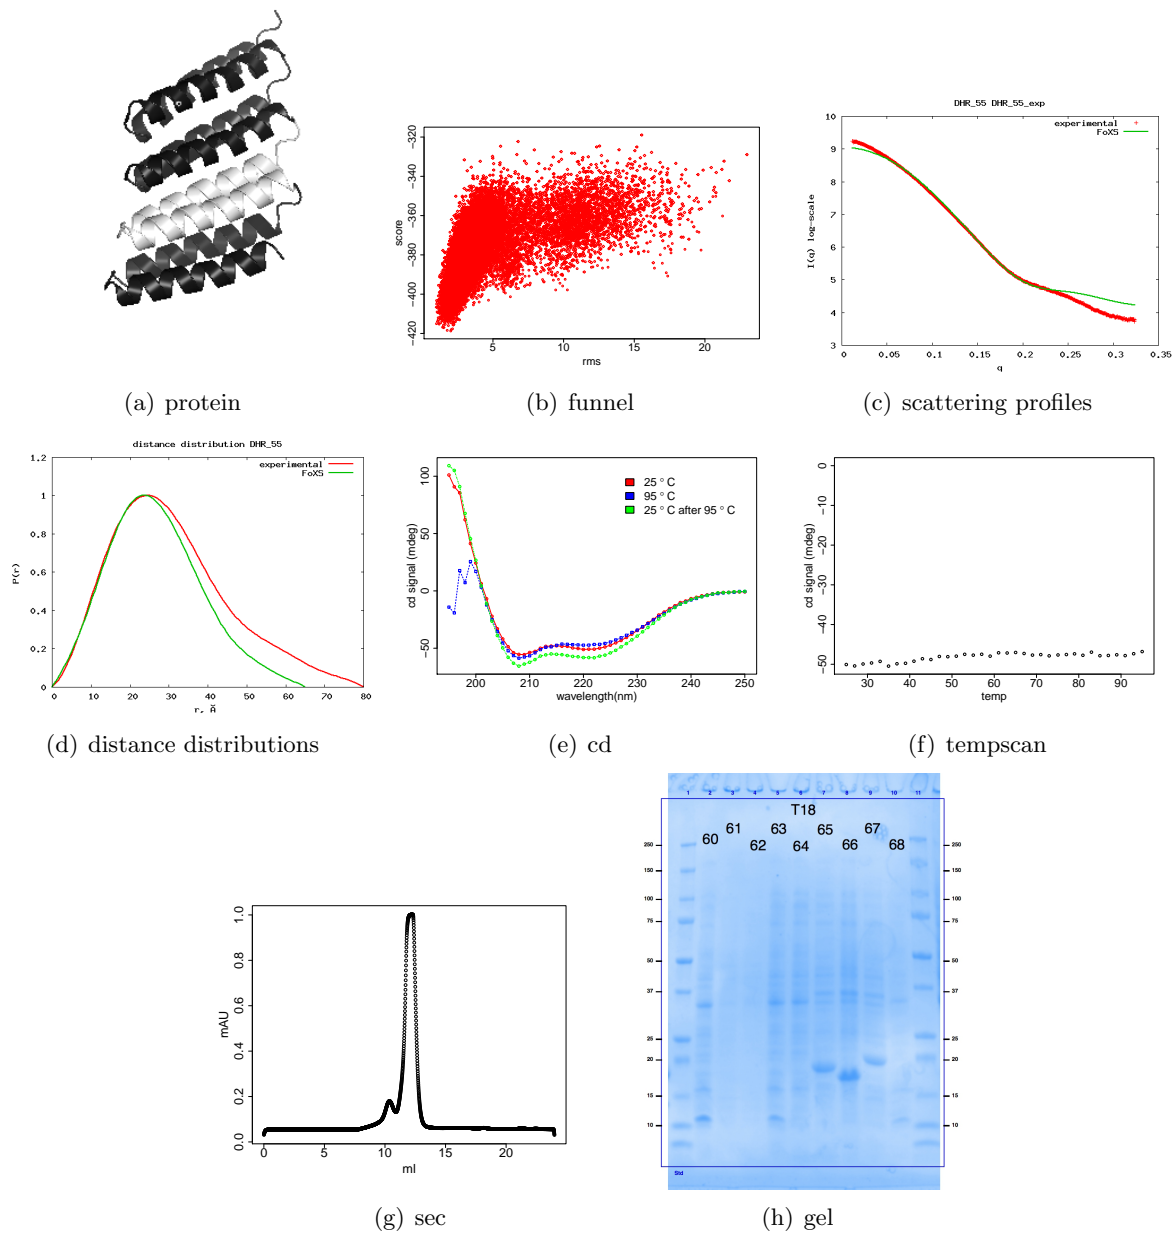

Figure 10: Protein : DHR55 labeled as 67 in gel.

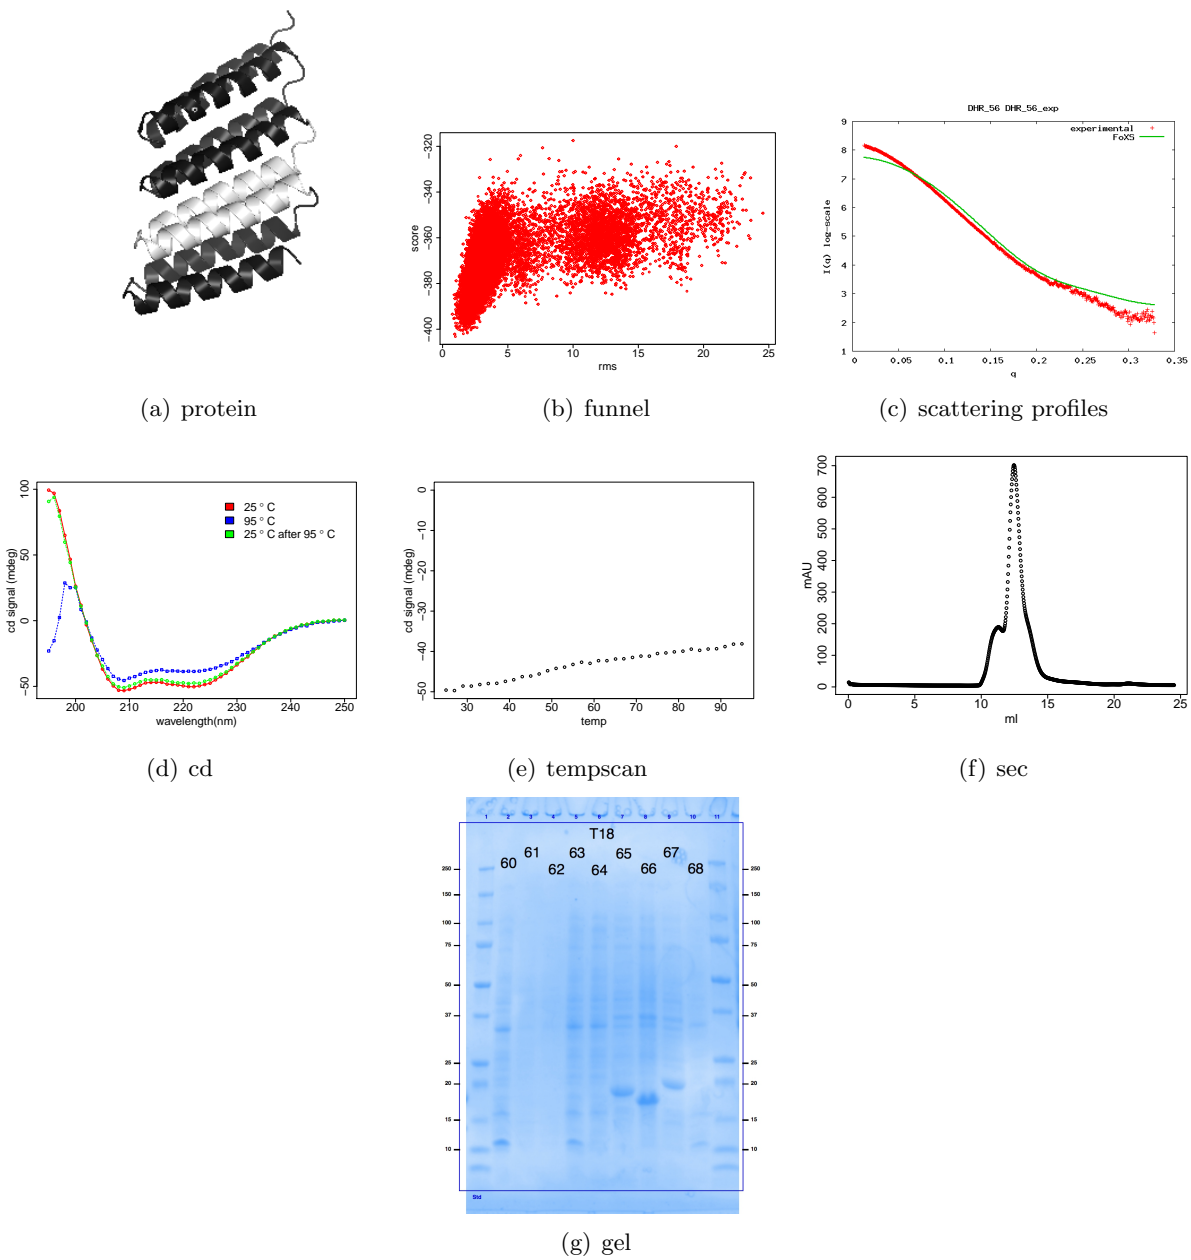

Figure 11: Protein : DHR56 labeled as 68 in gel.

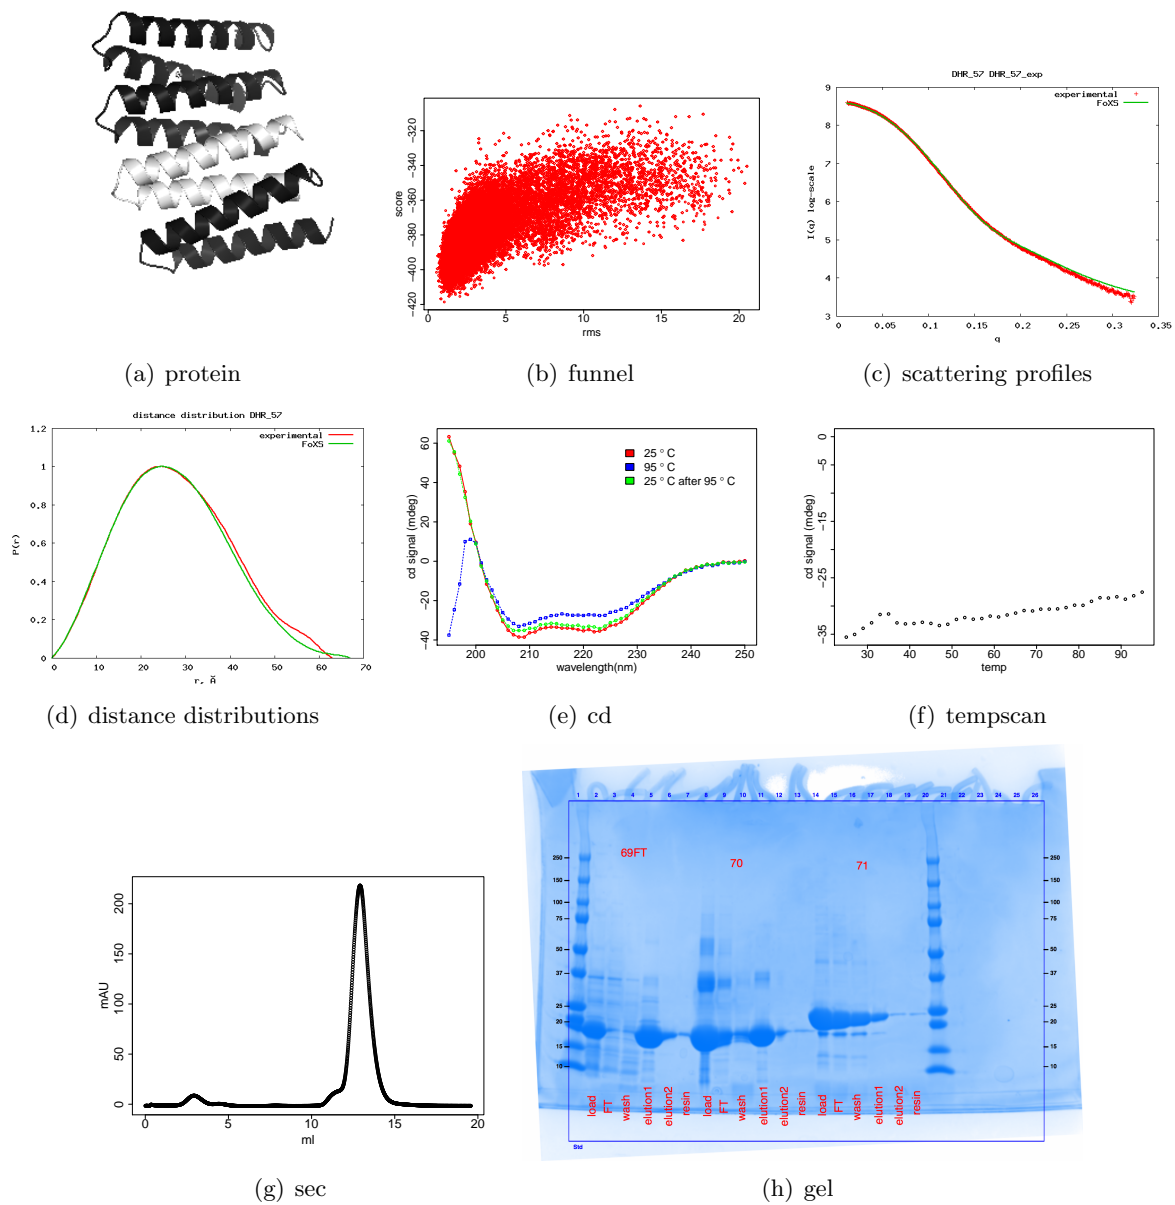

Figure 12: Protein : DHR57 labeled as 69 in gel.

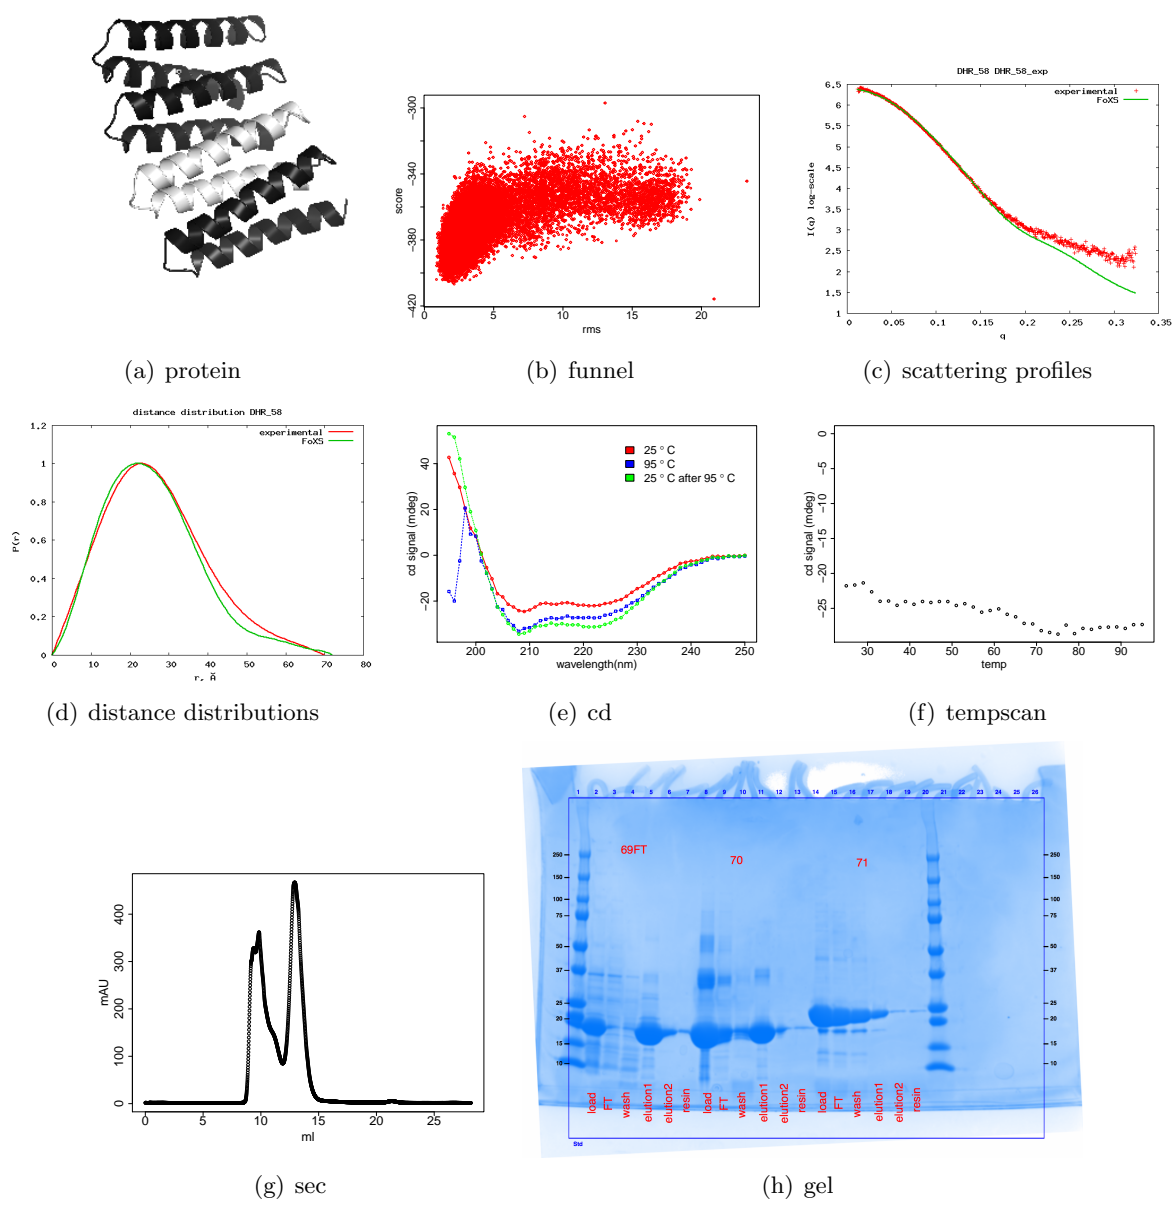

Figure 13: Protein : DHR58 labeled as 70 in gel.

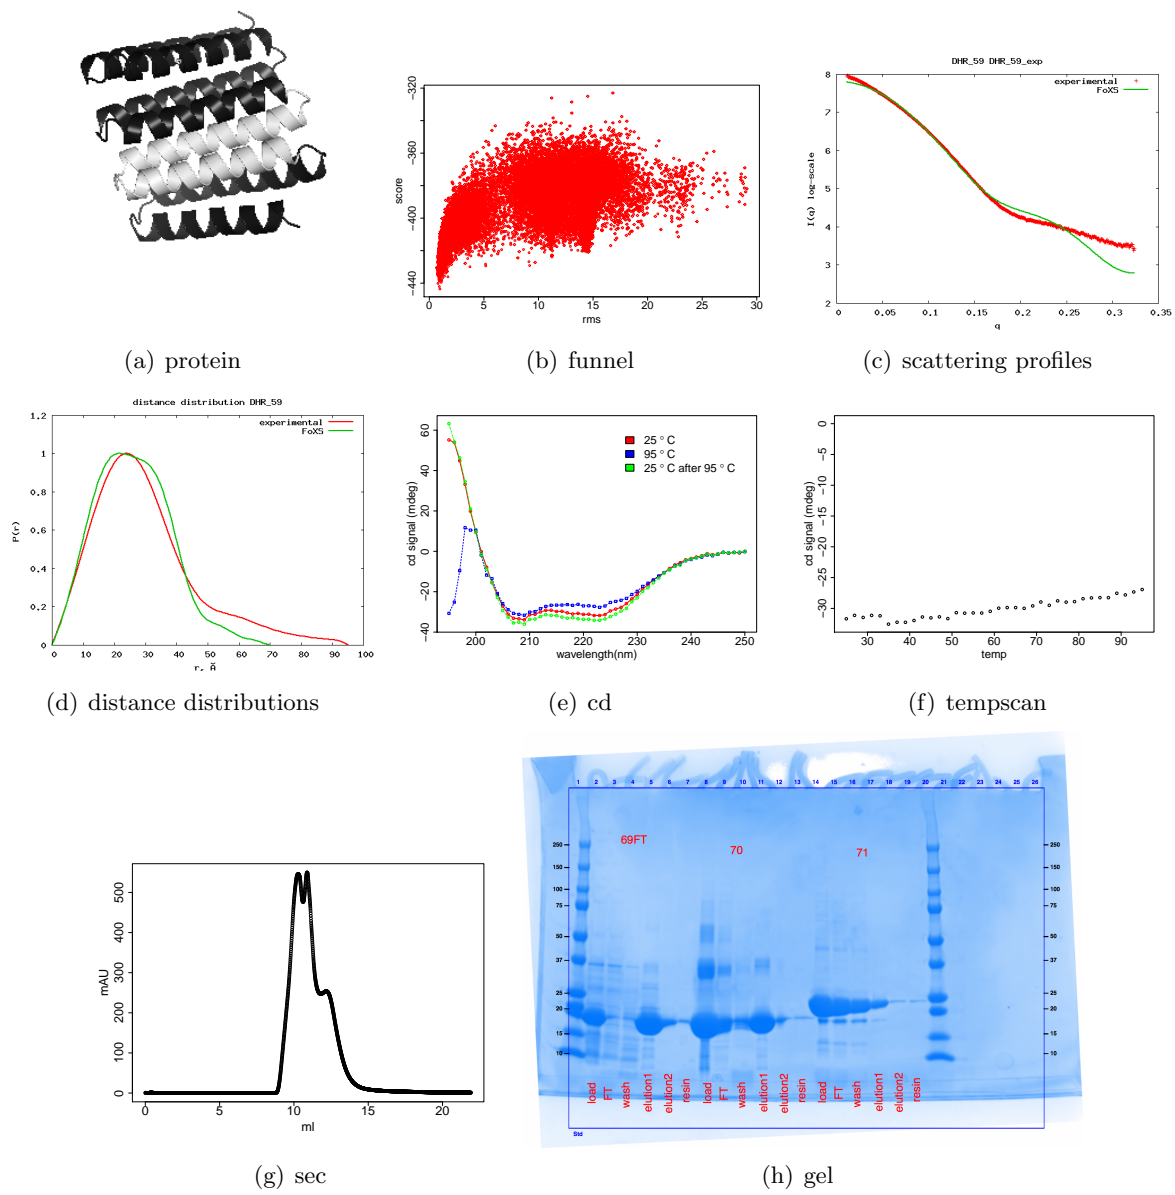

Figure 14: Protein : DHR59 labeled as 71 in gel.
