# Supplementary material
Source: PubMed Central journal article supplement (PMC4845728)
Supplement: NIHMS733599-supplement-supp_data4.pdf [file NIHMS733599-supplement-supp_data4.pdf]

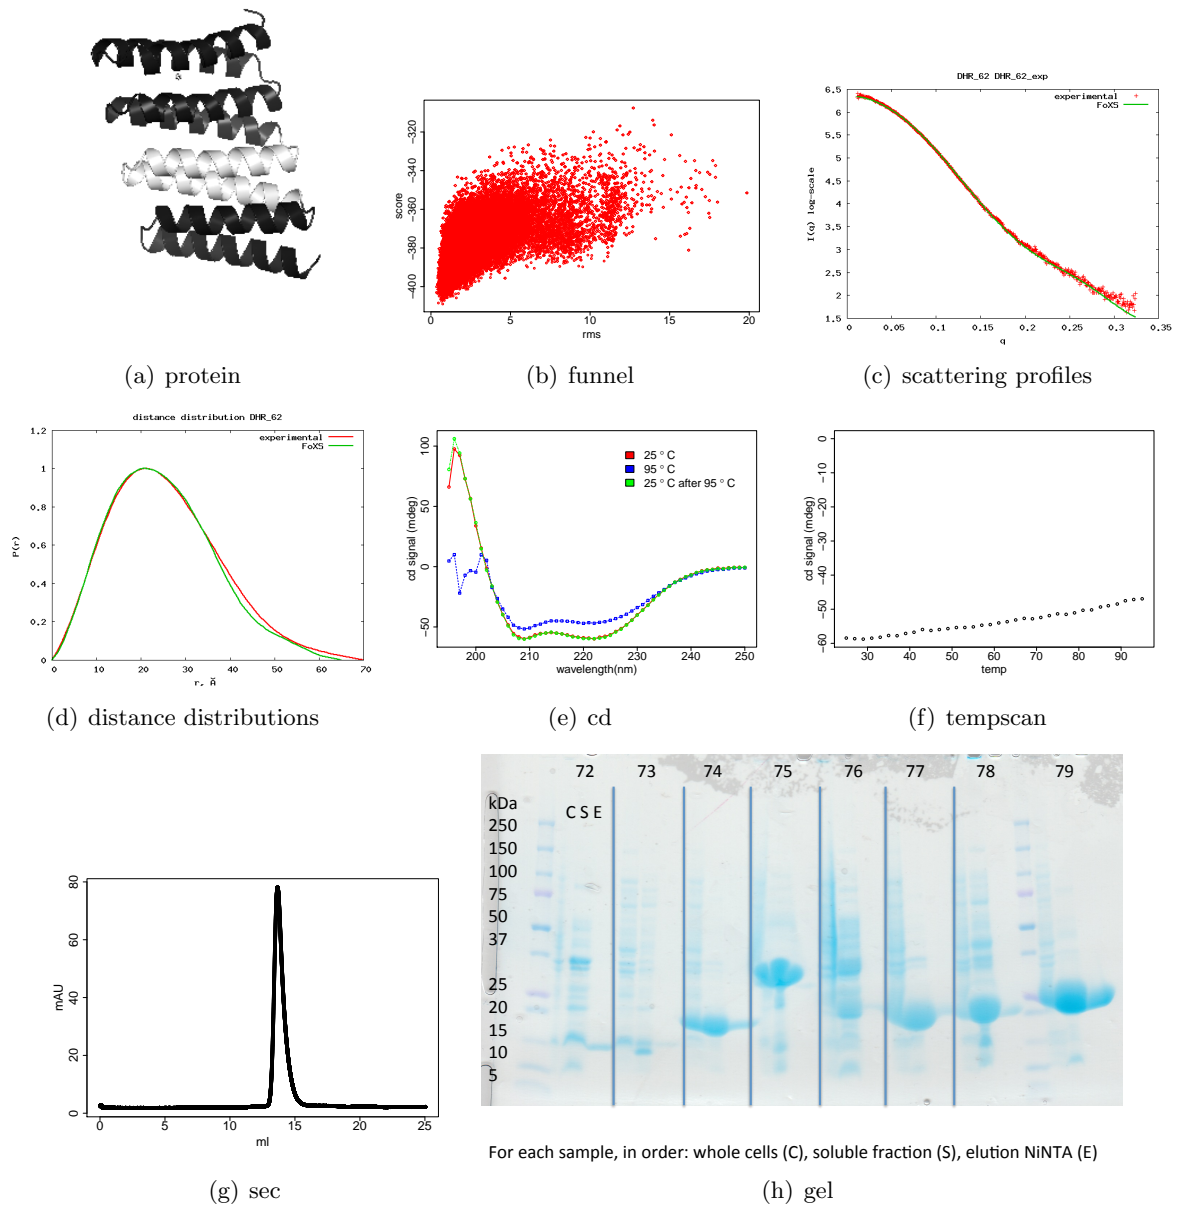

Figure 1: Protein : DHR62 labeled as 74 in gel.

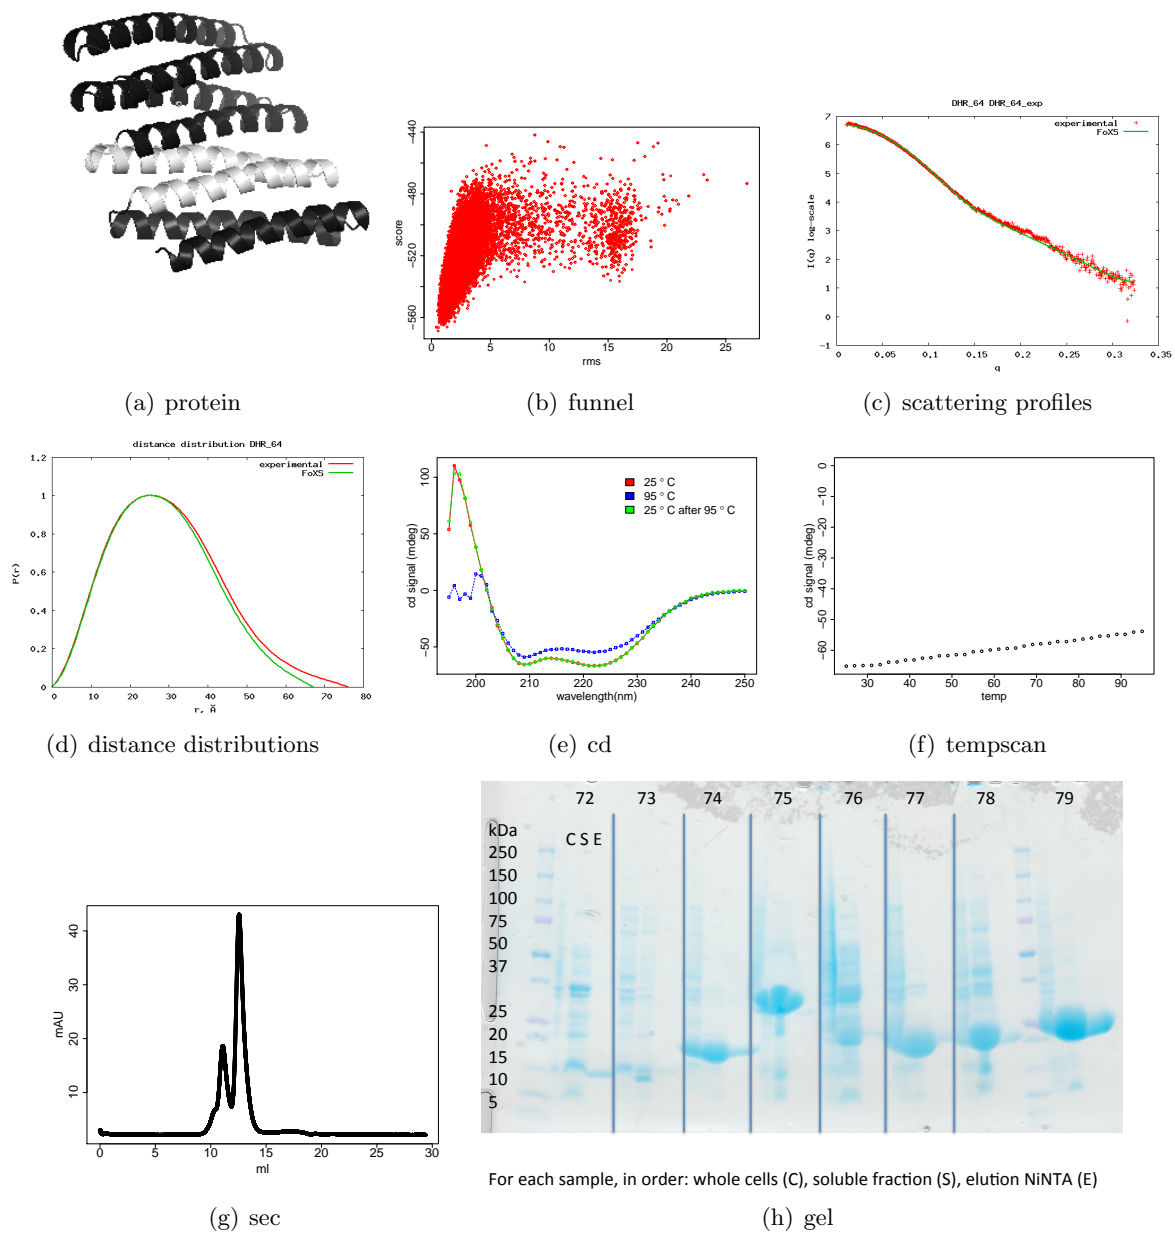

Figure 2: Protein : DHR64 labeled as 76 in gel.

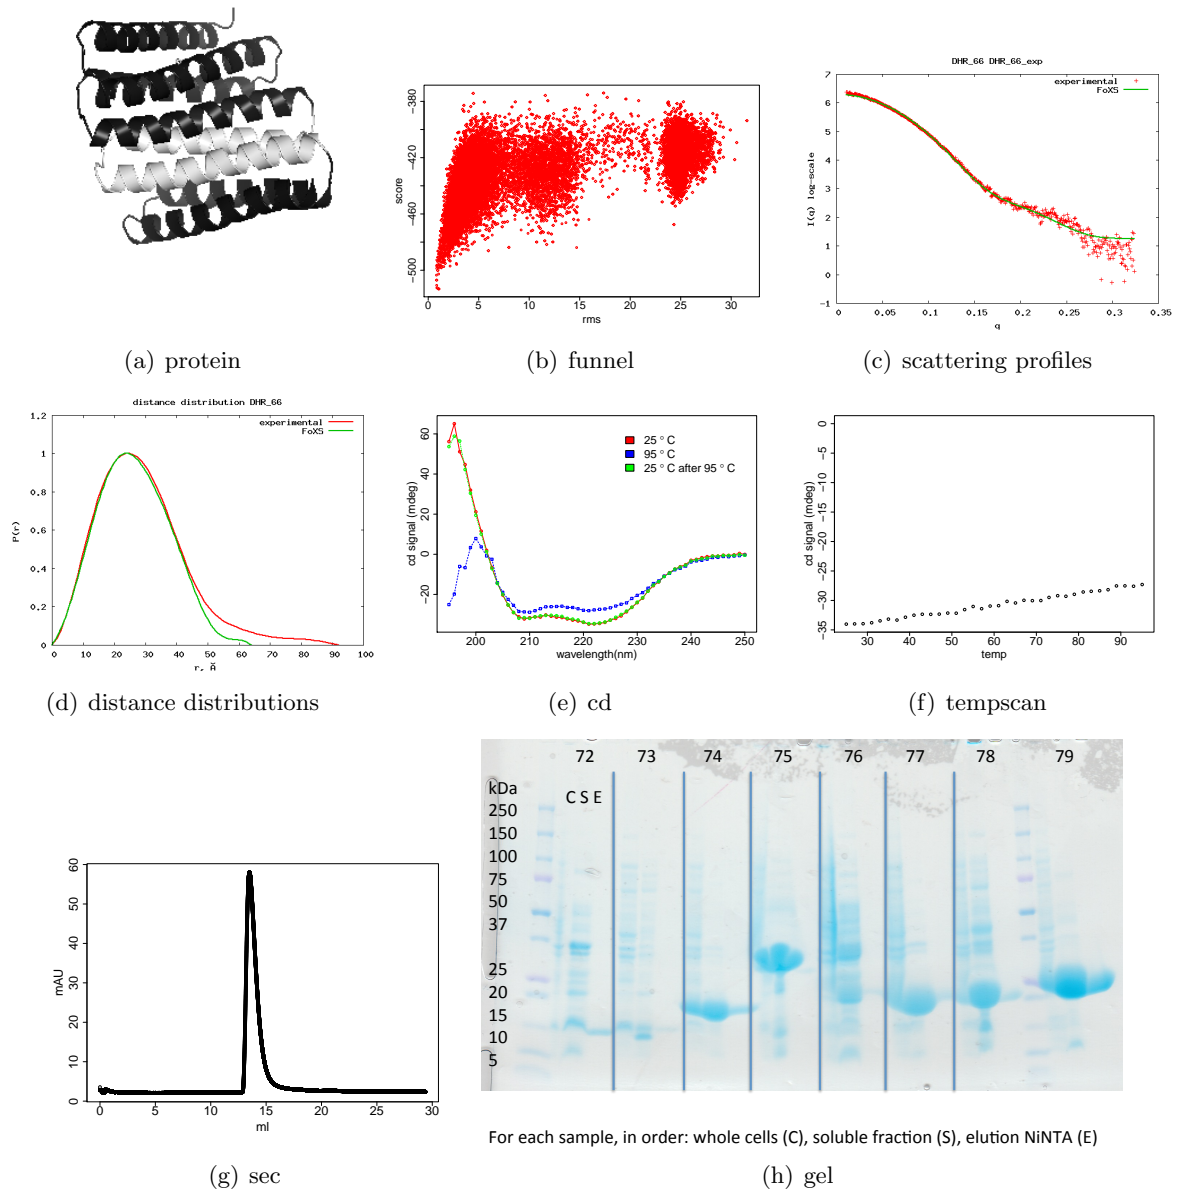

Figure 3: Protein : DHR66 labeled as 78 in gel.

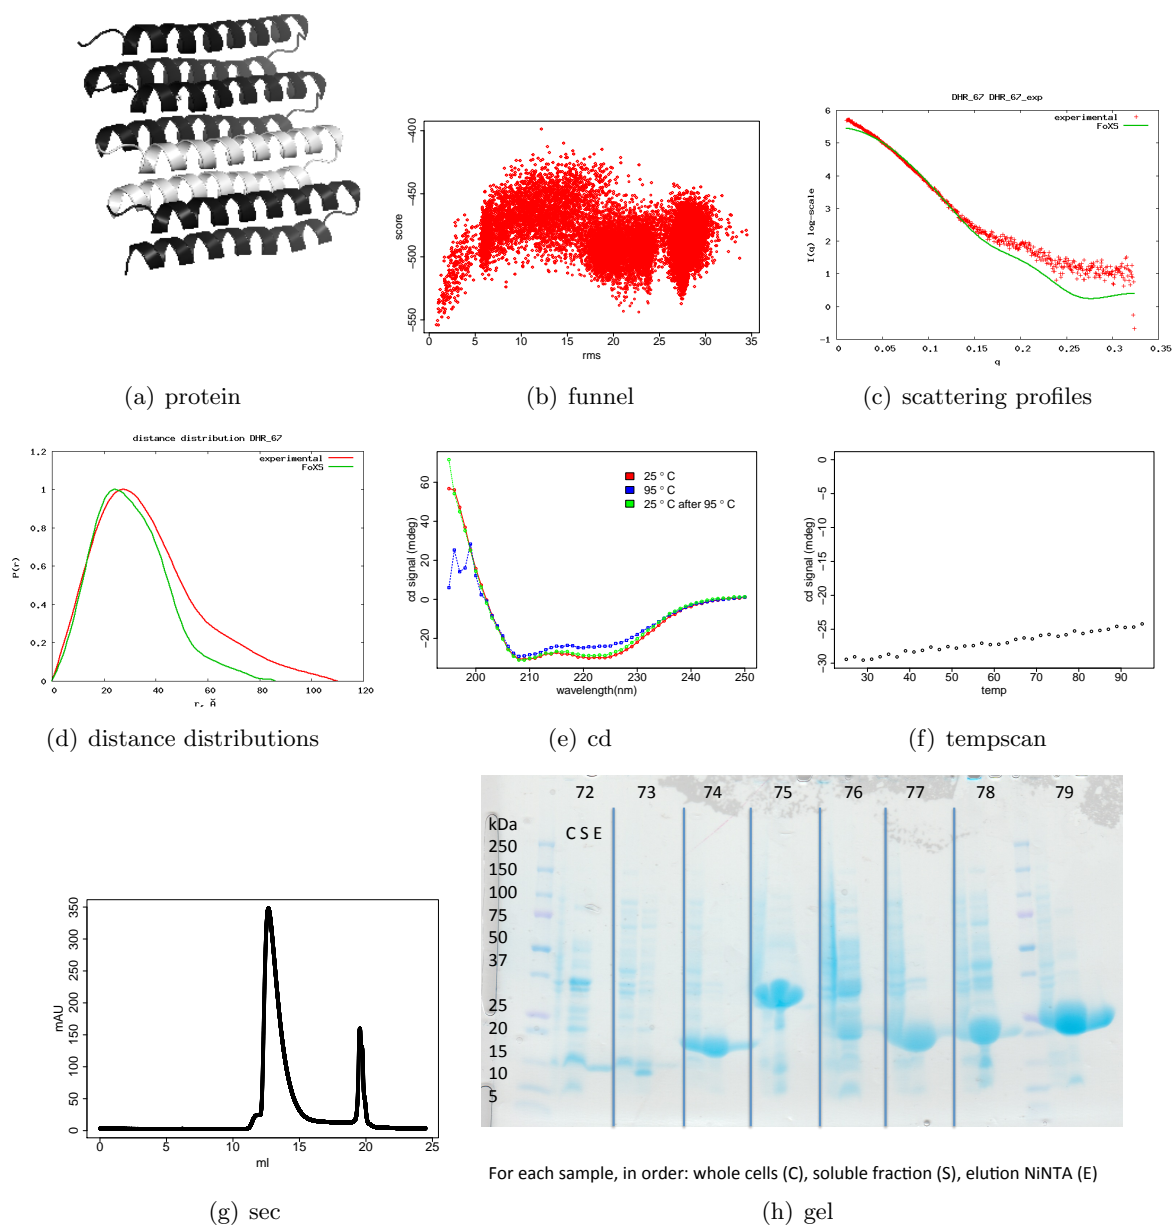

Figure 4: Protein : DHR67 labeled as 79 in gel.

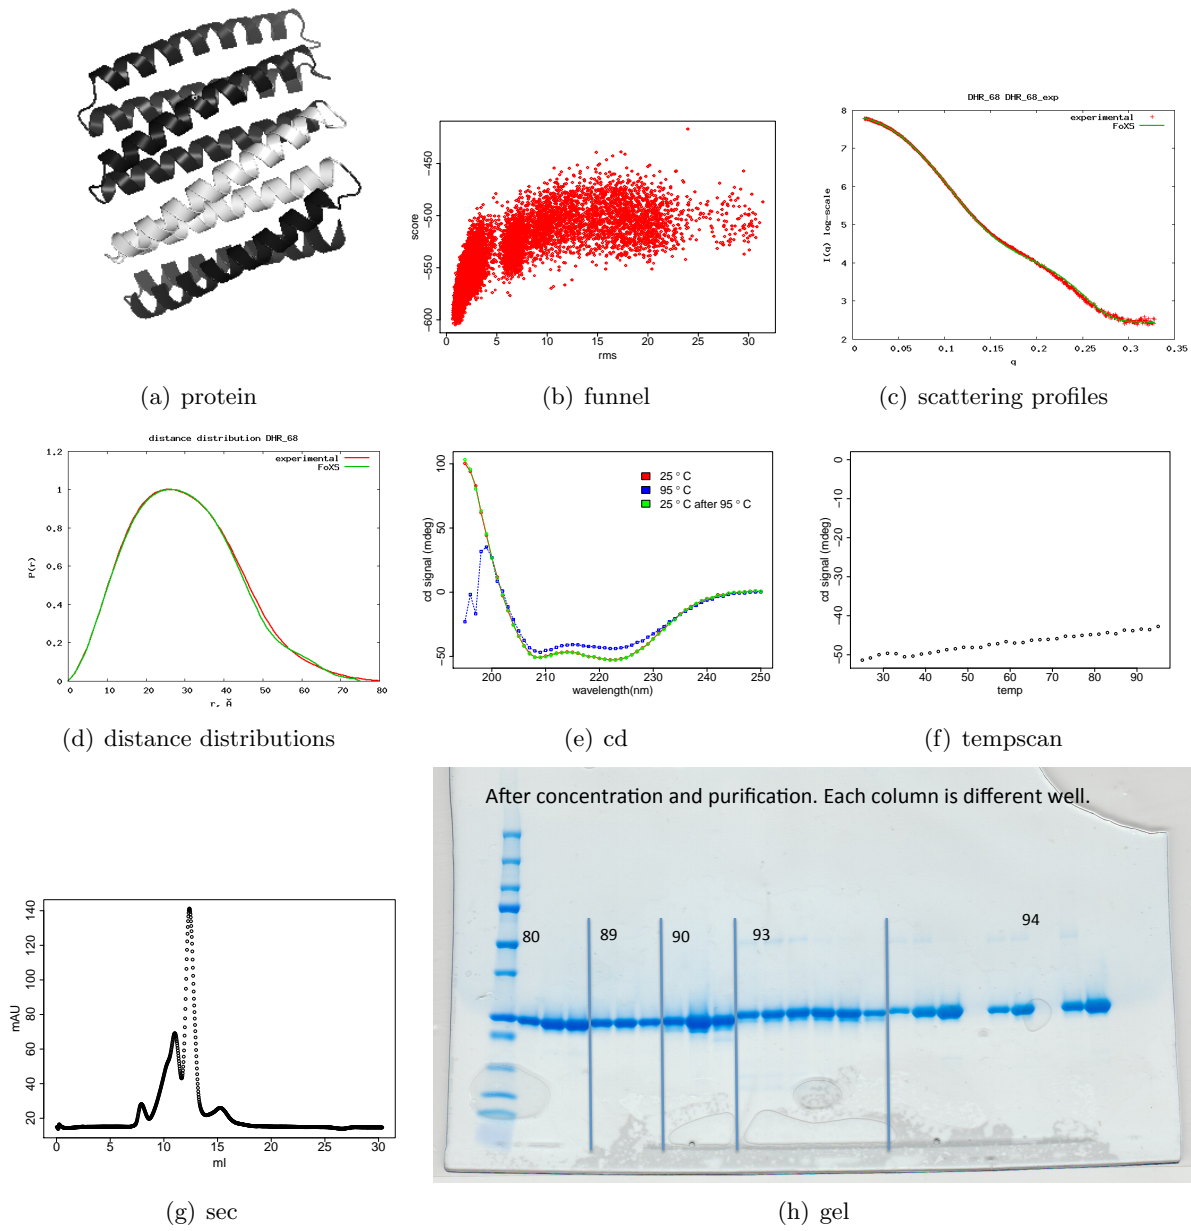

Figure 5: Protein : DHR68 labeled as 80 in gel.

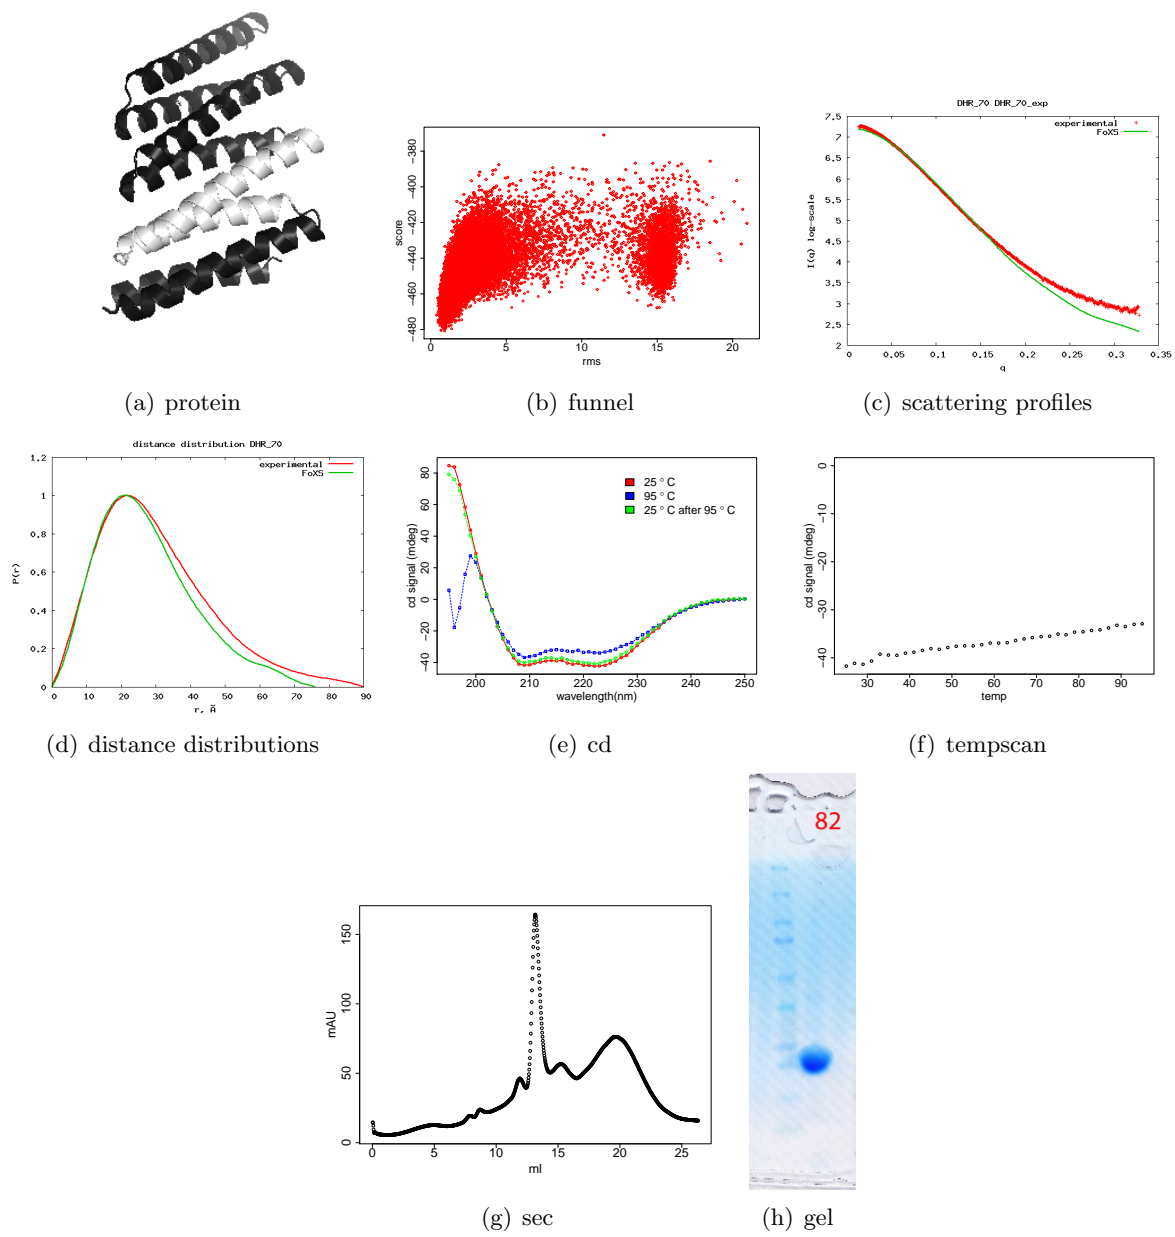

Figure 6: Protein : DHR70 labeled as 82 in gel.

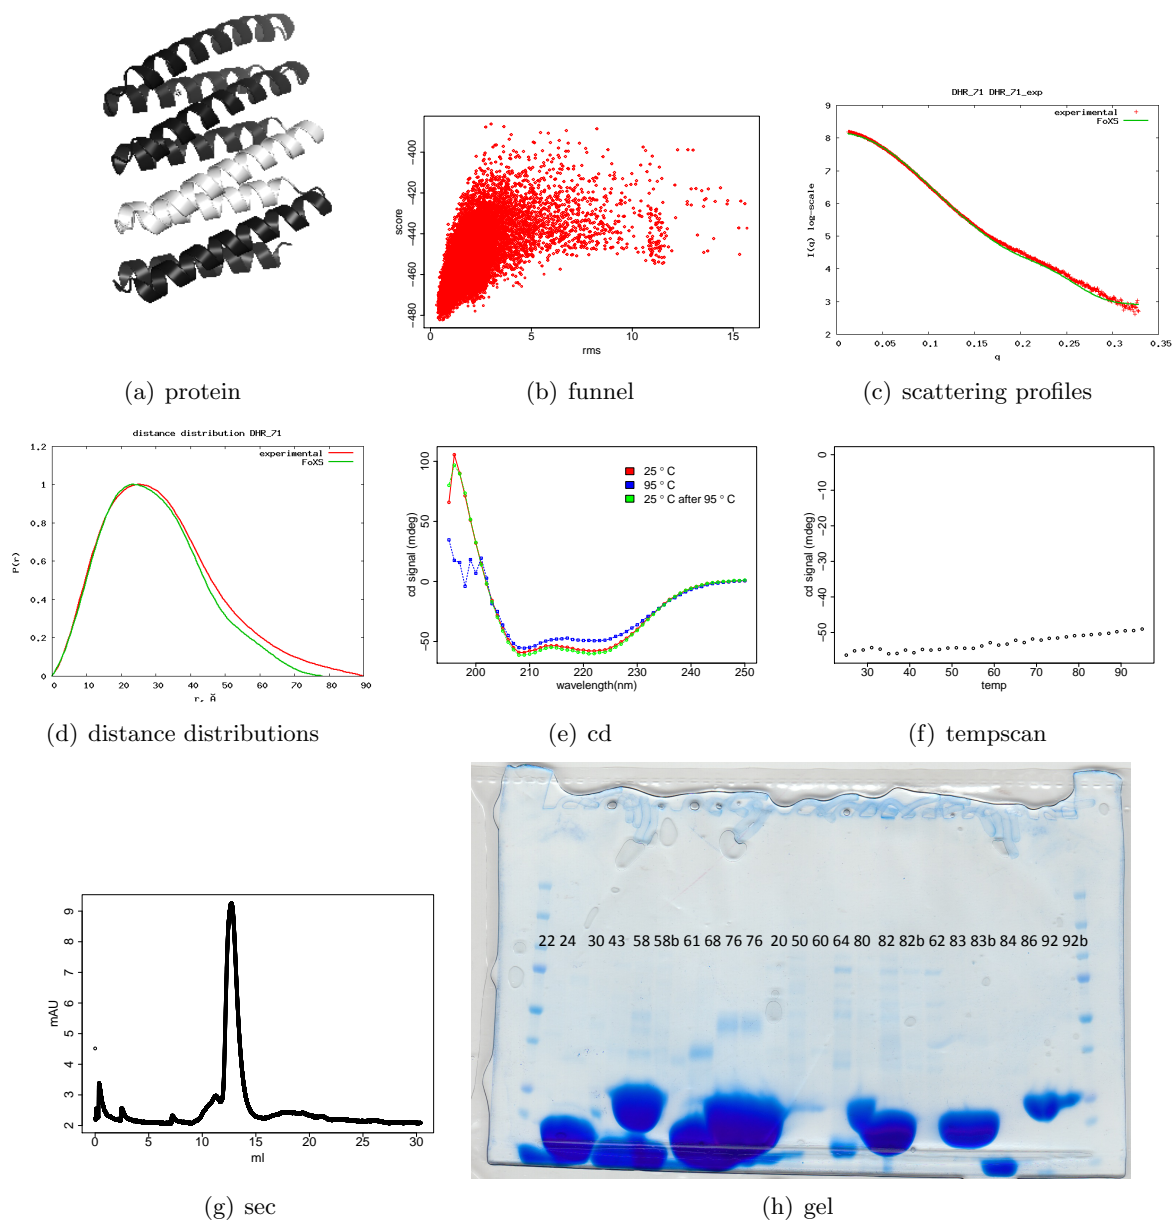

Figure 7: Protein : DHR71 labeled as 83 in gel.

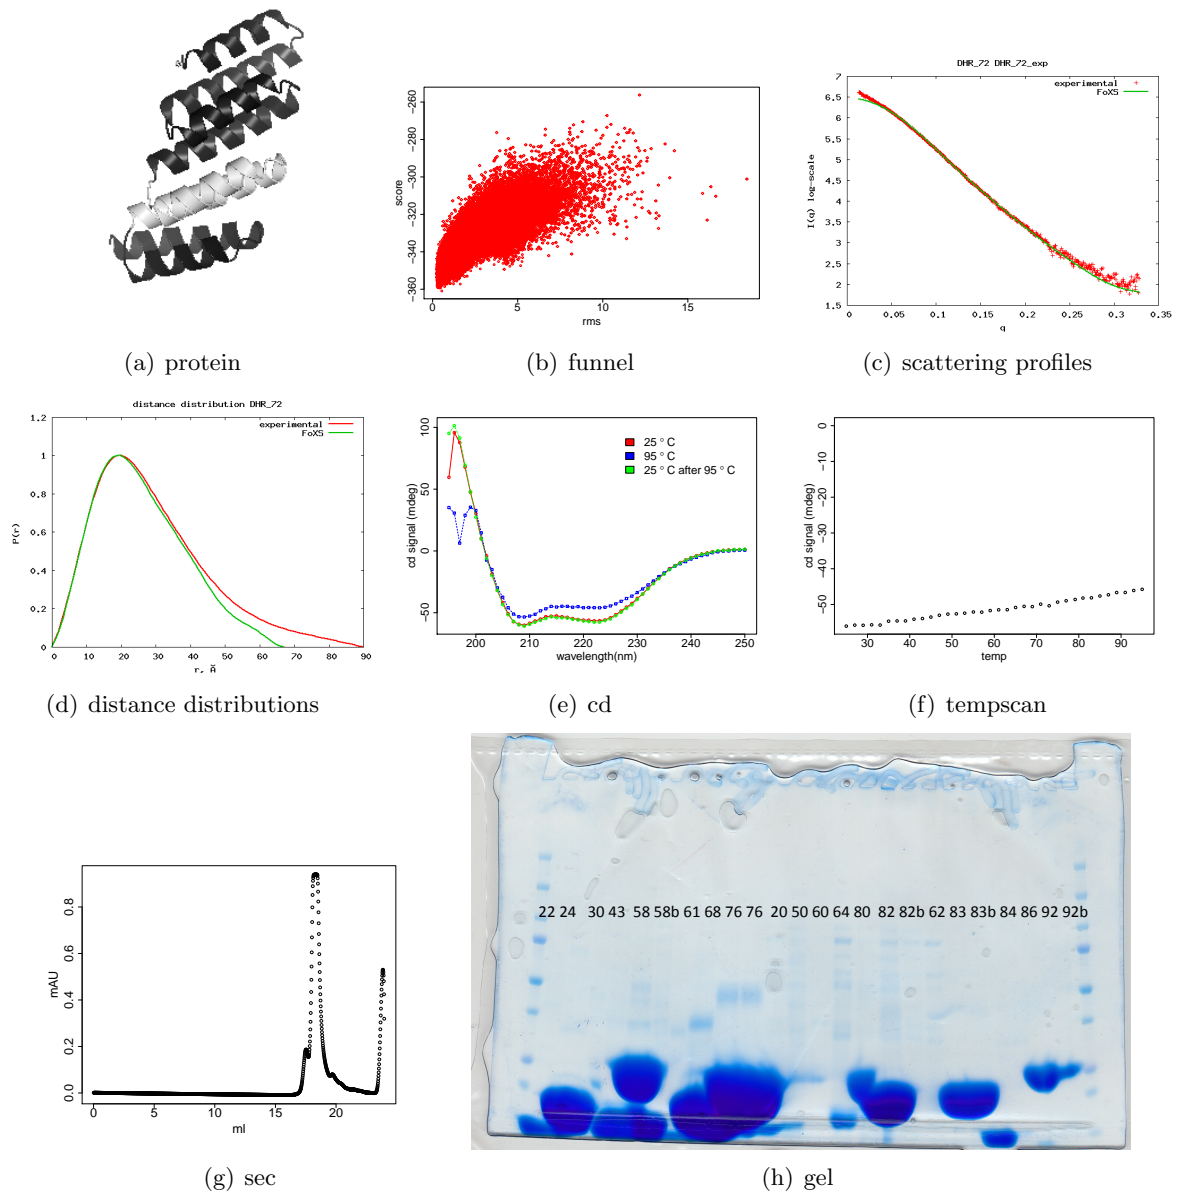

Figure 8: Protein : DHR72 labeled as 84 in gel.



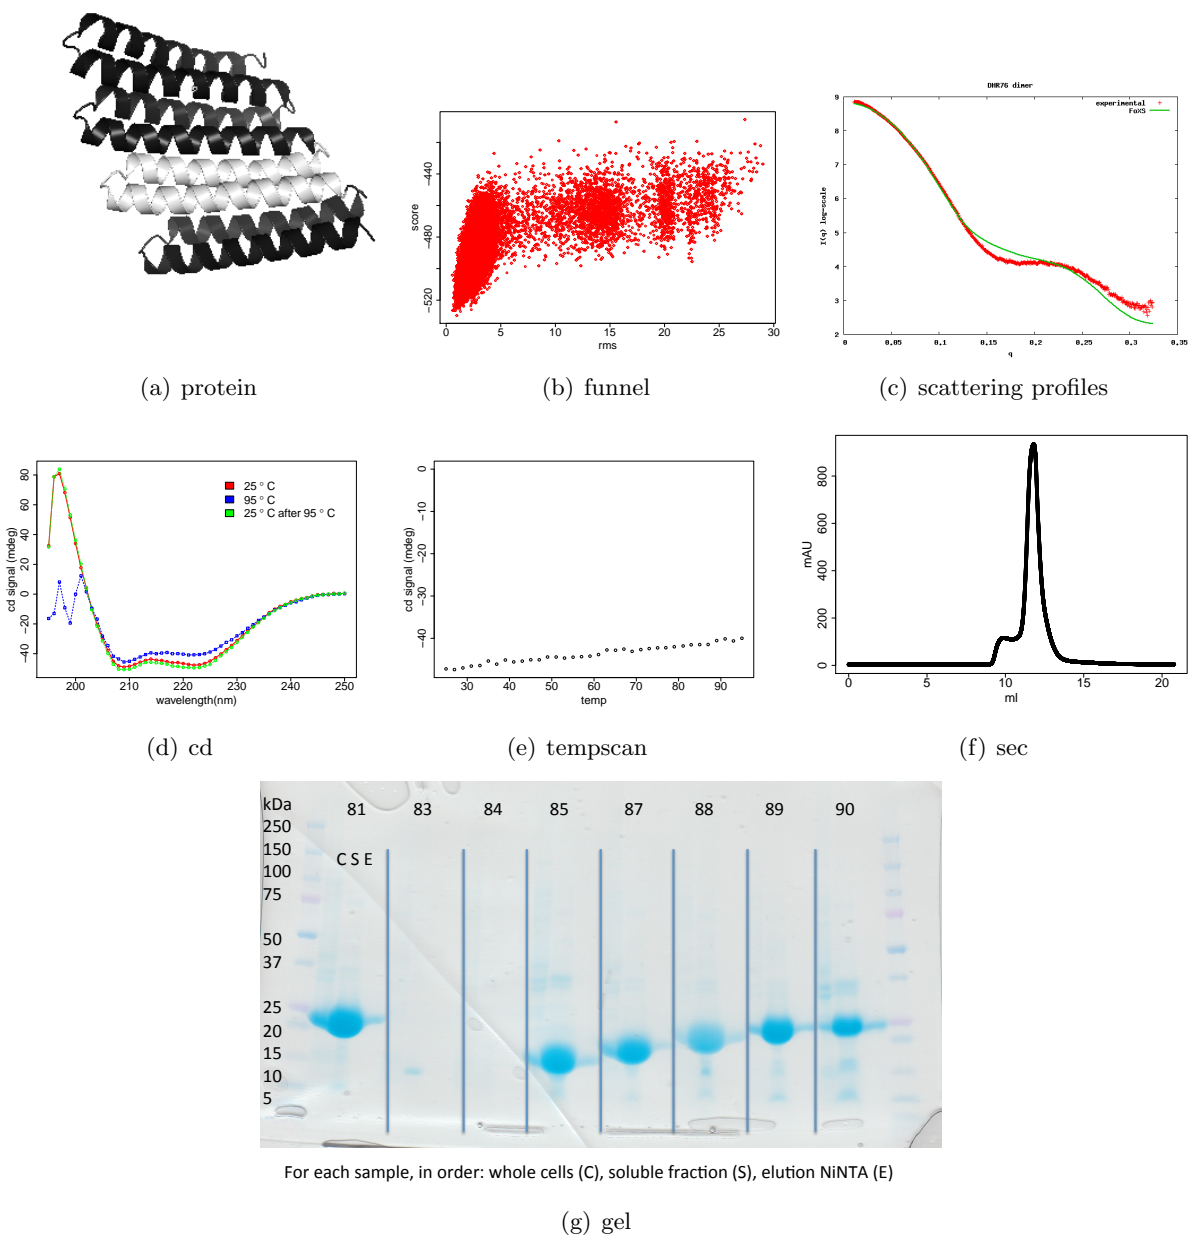

Figure 9: Protein : DHR76 labeled as 88 in gel.

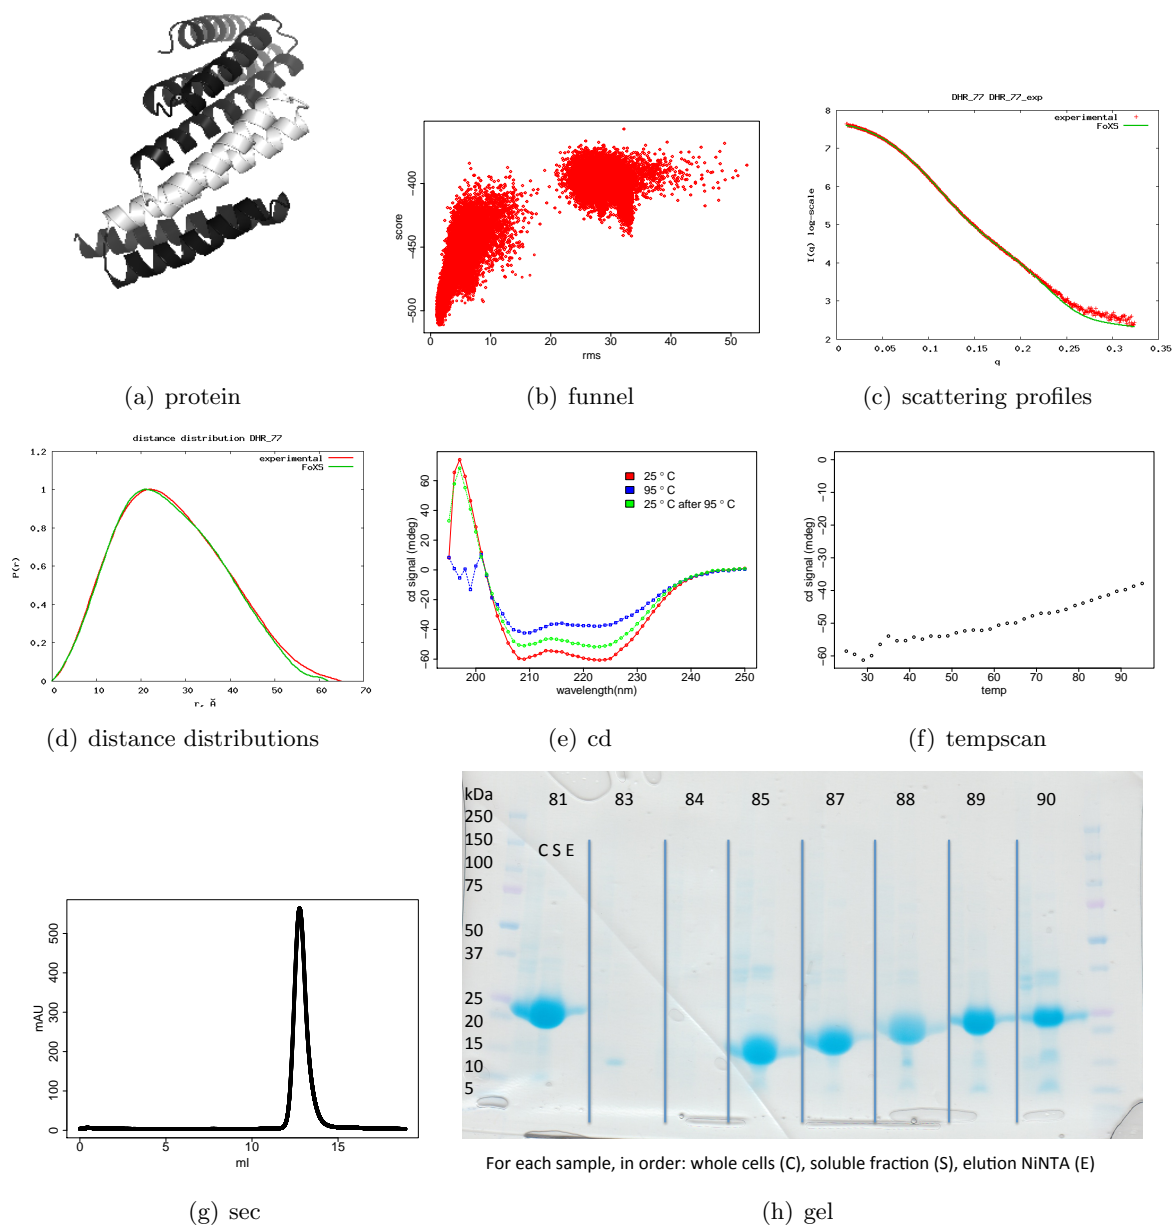

Figure 10: Protein : DHR77 labeled as 89 in gel.

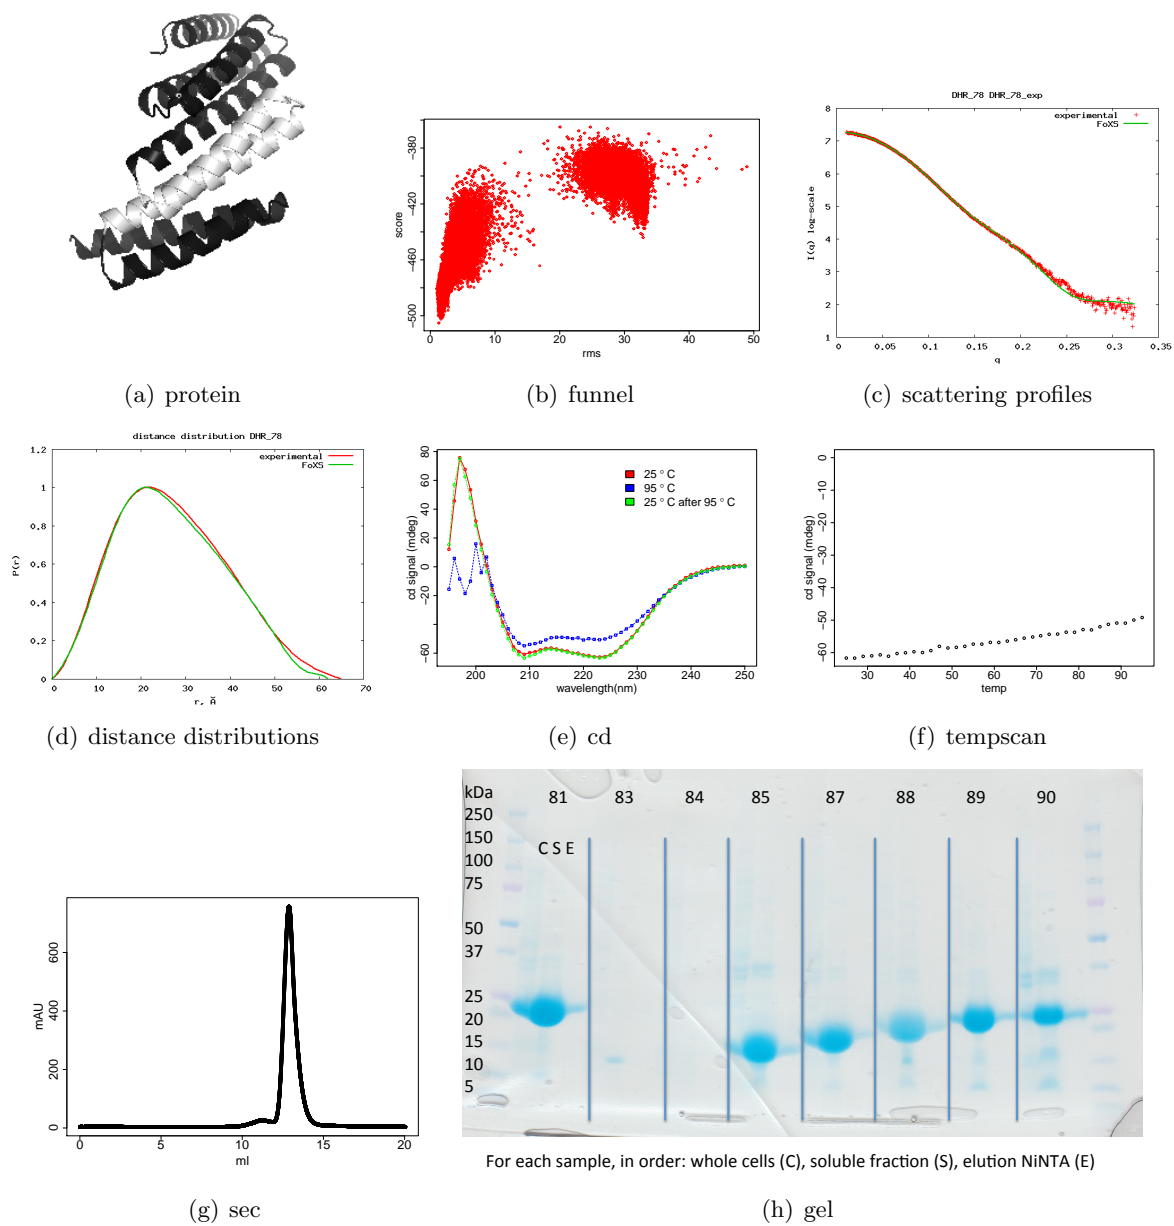

Figure 11: Protein : DHR78 labeled as 90 in gel.

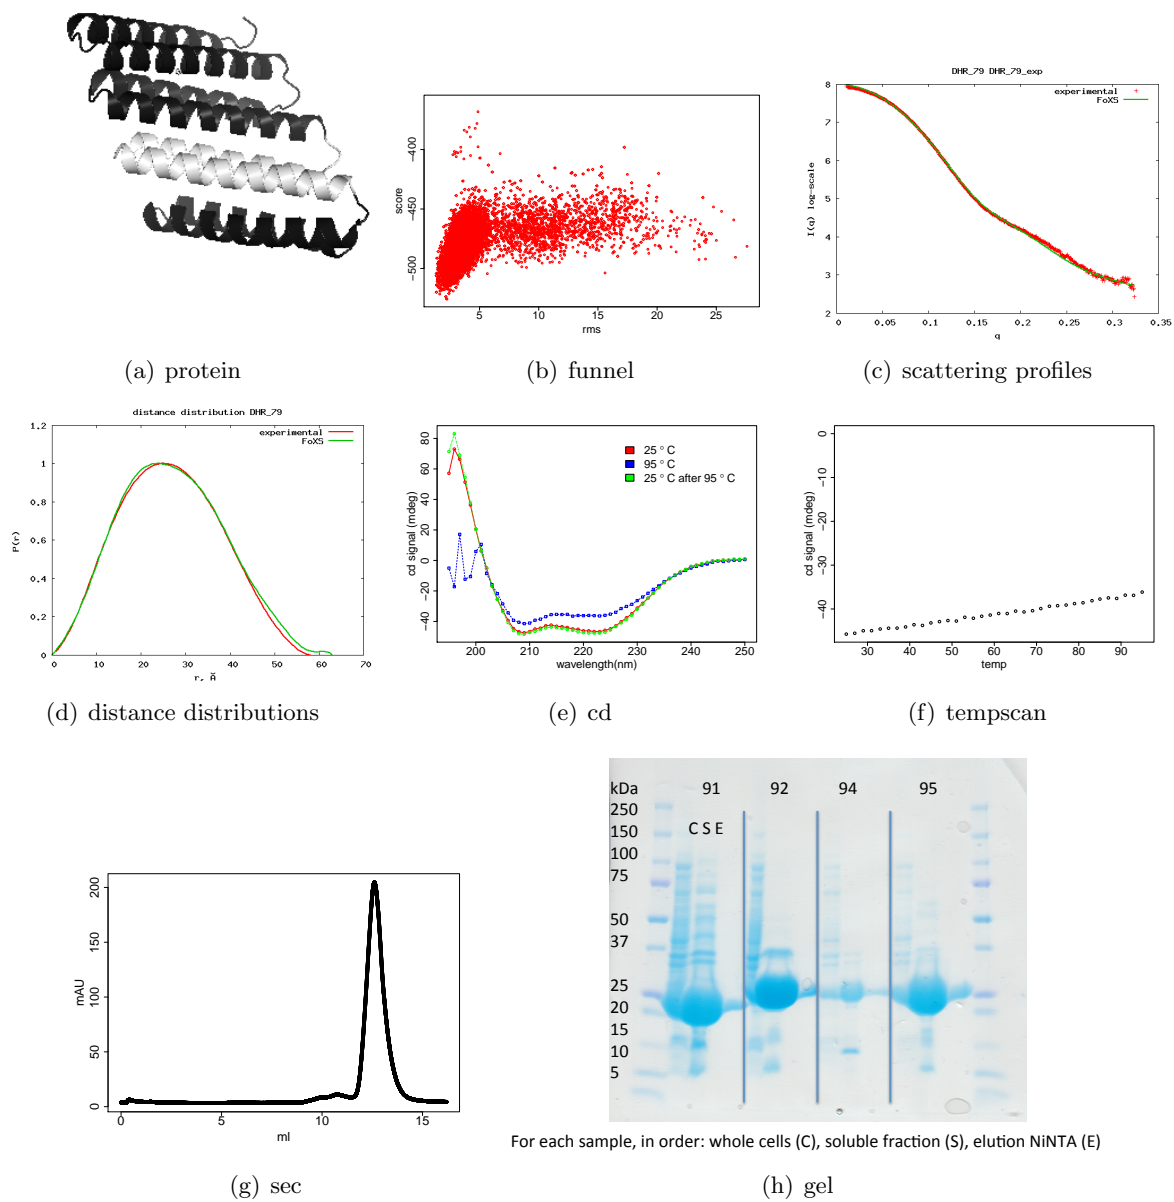

Figure 12: Protein : DHR79 labeled as 91 in gel.

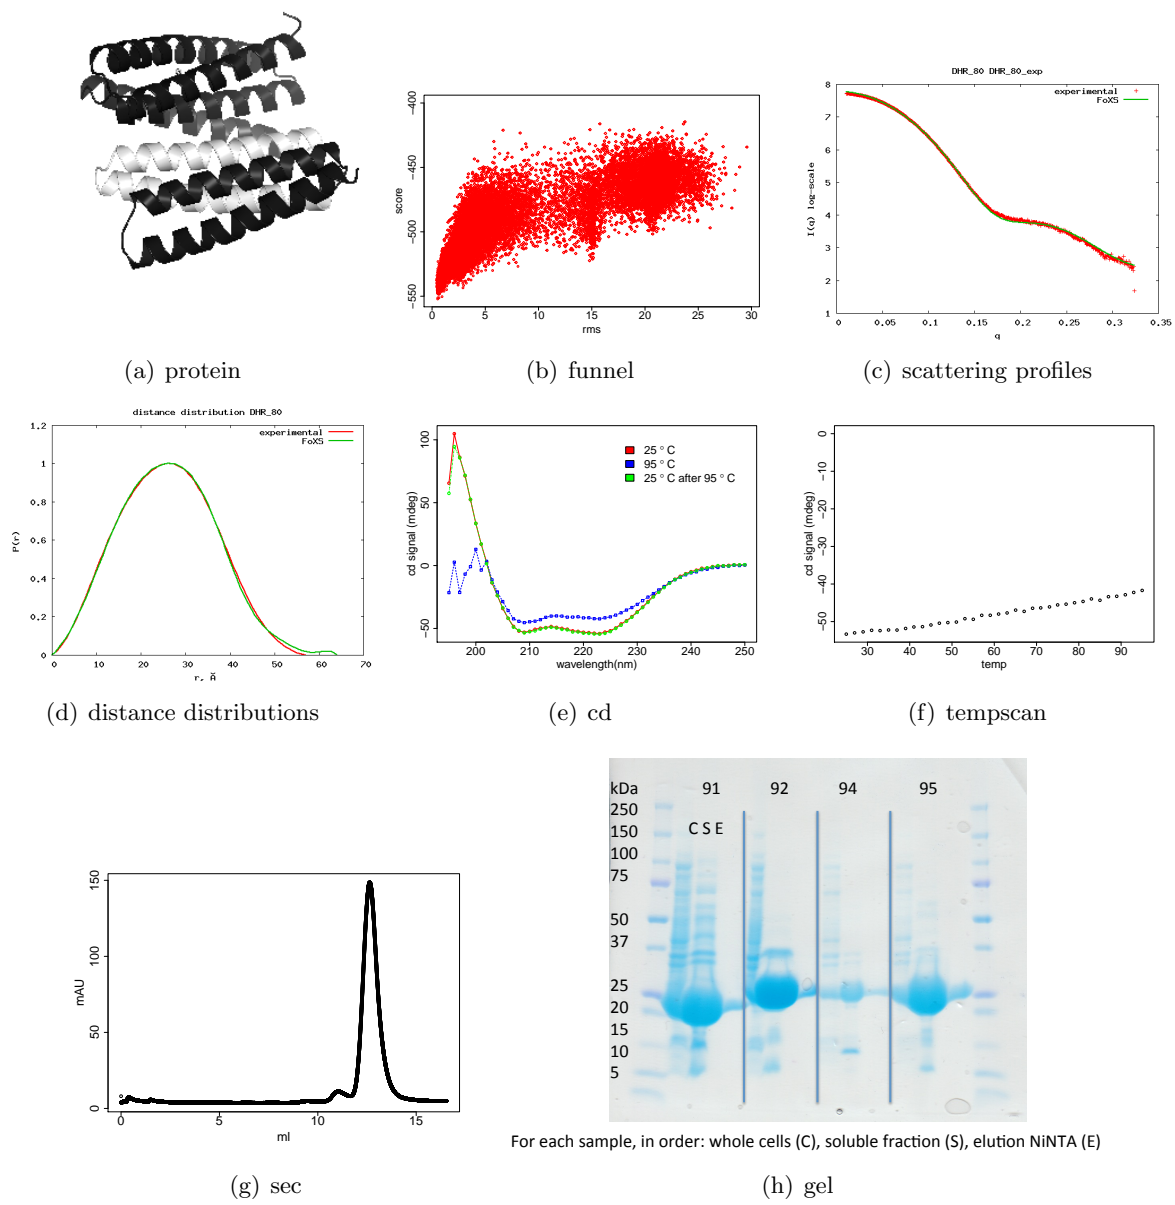

Figure 13: Protein : DHR80 labeled as 92 in gel.

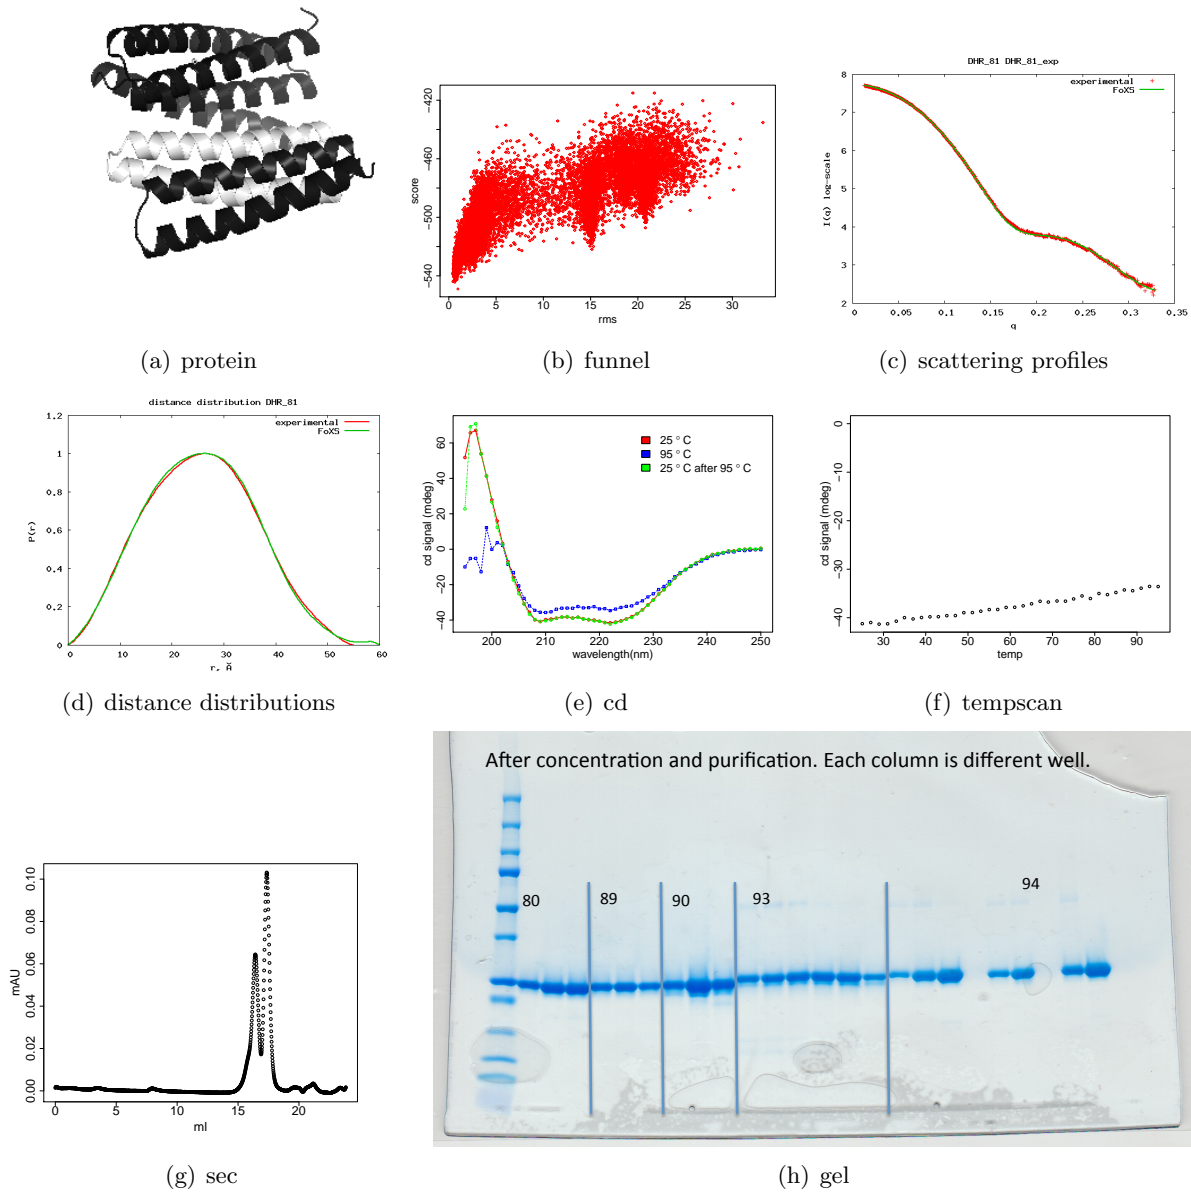

Figure 14: Protein : DHR81 labeled as 93 in gel.

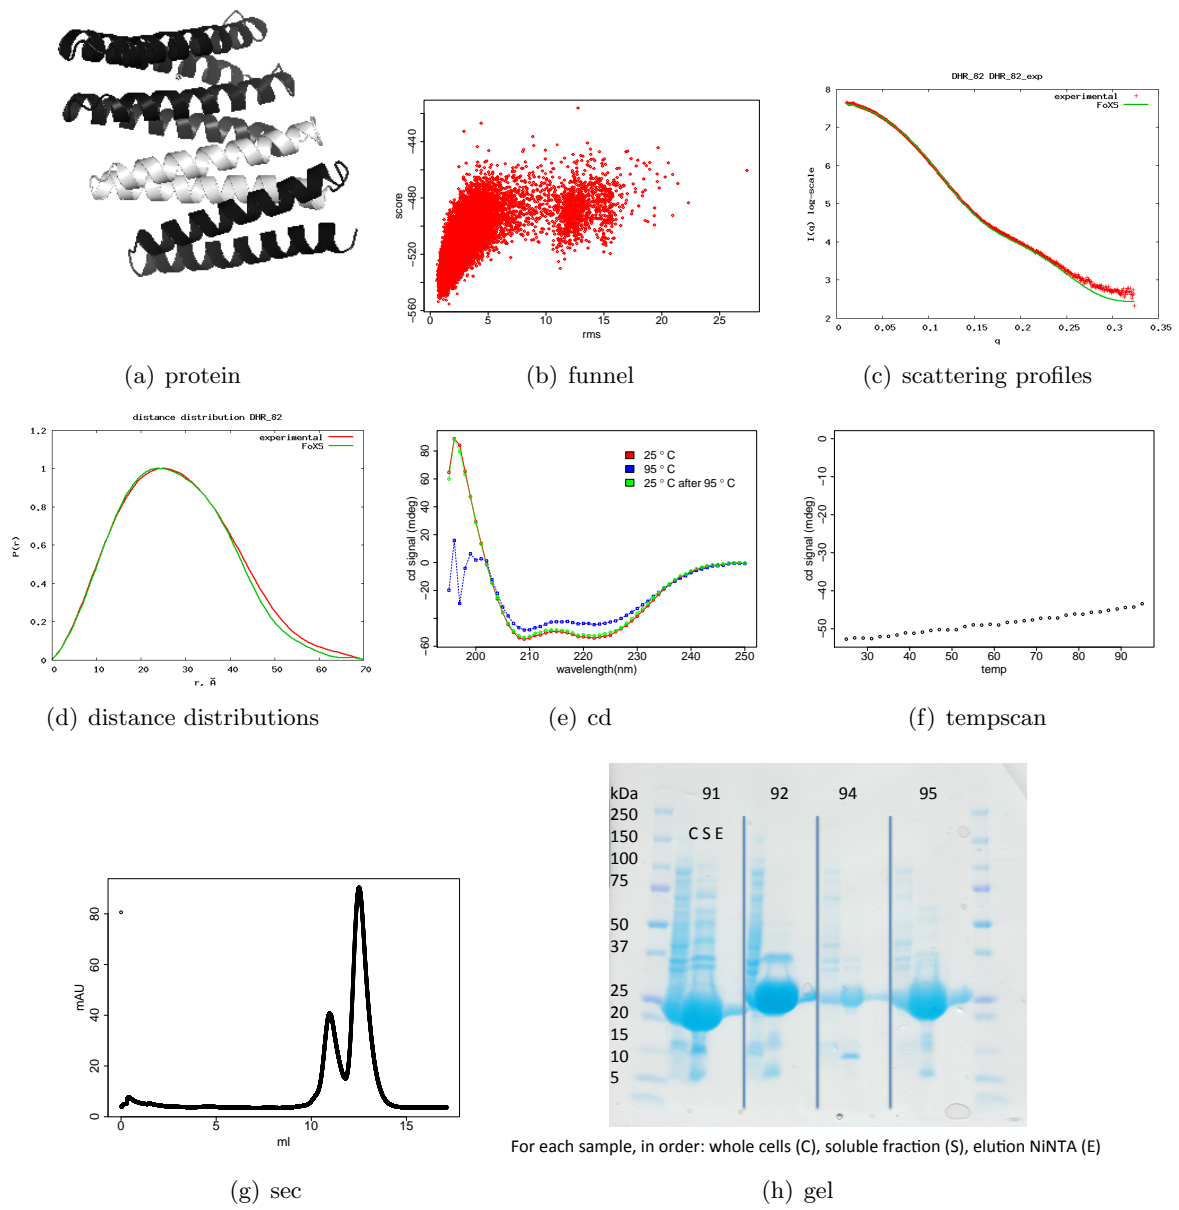

Figure 15: Protein : DHR82 labeled as 94 in gel.
