# Supplementary material
Source: PubMed Central journal article supplement (PMC4845728)
Supplement: NIHMS733599-supplement-supp_info.pdf [file NIHMS733599-supplement-supp_info.pdf]

## **Exploring the repeat protein universe through computational protein design**

### **Authors**

TJ Brunette\* 1,2, Fabio Parmeggiani\* 1,2, Po-Ssu Huang\* 1,2, Gira Bhabha 3, Damian Ekiert 4, Susan E, Tsutakawa 5, Greg L. Hura 6, John A. Tainer 5,6 and David Baker 1,2,7

\*These authors contributed equally to this work

### **Affiliation**

1 Department of Biochemistry, University of Washington, Seattle, WA 98195, USA

2 Institute for Protein Design, University of Washington, Seattle, WA 98195, USA

3 Department of Cellular and Molecular Pharmacology, UCSF, San Francisco, CA 94158, USA

4 Department of Microbiology and Immunology, UCSF, San Francisco, CA 94158, USA

5 Life Sciences Division, Lawrence Berkeley National Laboratory, Berkeley, CA 94720, USA

6 Department of Molecular and Cellular Oncology, The University of Texas M. D. Anderson Cancer Center, 1515 Holcombe Blvd., Houston, Texas 77030, USA

7 Howard Hughes Medical Institute, University of Washington, Seattle, WA 98195, USA

### Contents

**Supplementary Discussion 1 | Computational protocol**

**Supplementary Table 1 | Detailed protocol used for each design**

**Supplementary Discussion 2 | Geometric parameters of Designed Helical Repeat proteins**

**Supplementary Table 2 | Global geometric parameters**

**Supplementary Table 3 | Local geometric parameters**

**Supplementary Discussion 3 | Structure and sequence comparison**

**Supplementary Table 4 | Sequence comparison**

**Supplementary Discussion 4 | Structure determination remarks**

**Supplementary Table 5 | Summary crystallization**

**Supplementary Tables 6-14 | Crystallographic data collection**

**Supplementary Discussion 5 | Small Angle X-ray Scattering analysis**

**Supplementary Table 15 | Summary of SAXS analysis**

**Supplementary Table 16 | Sequences**

**Supplementary References**

## Supplementary Discussion 1 | Computational protocol

We have developed a method for construction of Designed Helical Repeats (DHRs) depicted in Extended Data Fig. 1 and described below. We designed proteins based on repeating units formed by two helices and two loops. For all proteins this design process was completely automated and no manual refinement was involved. Using this protocol 69 proteins with diverse architectures were selected from the *in silico* candidates. For 14 models, an additional version that included disulphide bonds was selected, for a final list of 83 proteins that were experimentally tested. This design method has progressed over the duration of this research and only the final design method is described below. The status of the computational design method when each design was experimentally tested is illustrated in Supplementary Table 1.

Each of the following sections describes one step in Rosetta\_examples and corresponds to the flow chart in Extended Data Fig. 1. The fraction of models passing each design stage and their distribution according to helix and loop length are shown in Extended Data Fig. 2. The Rosetta design code for each step is provided as Supplementary Material: Rosetta\_examples, which requires Rosetta git version c876538.

### 1 Backbone Design

The backbone design stage employs a simplified side chain representation (centroid)<sup>1</sup>. The backbone assembly procedure begins by picking fragments harvested directly from a non-redundant set of structures from PDB<sup>2</sup>. The fragments contain only residues that fall into the space of phi-psi backbone angles of either helices or loops depending on the desired secondary structure. Loop fragments could be further specified to fall within desired ABEGO bins<sup>3</sup> as described by Koga *et al.*<sup>4</sup>.

The fragments were assembled using a Monte-Carlo sampling procedure that was initialized with ideal-helices and extended loops. After every fragment sampling step, which was allowed only in the first repeat unit and at the junction between the first and the second units, the change was propagated to all downstream repeats and scored. The score function we used considered van der Waals interactions, packing, values of backbone dihedral angles, and radius of gyration (RG) that was applied to only the first and second repeat-unit (RG-local). The RG term promotes the formation of globular proteins so applying RG to the whole model produced only highly curved structures. The sampling procedure in the database used 1500 Monte Carlo fragment insertions and was further improved to 3200 steps ordered as following: 100 Monte Carlo moves with 9 residue fragments then 100 moves with 3 residue fragments, both allowed only in loops. The loop sampling was followed by 1500 moves with 9 residue fragments and 1500 moves with

3 residue fragments, both in helices and loops (improved sampling). The improvements resulted in a 3.3 times increase of acceptance at the centroid stage. The backbone was represented as poly-tyrosine during the centroid building, maintaining enough space within the core to accommodate both small and large side chains in the design step.

Using this procedure we designed 2.88 million backbones by making 500 structures for each of 5776 different secondary structure combination.

## ***2 Backbone quality filter: RMSD loop threshold and motif score***

Designed backbones were screened for native-like features. First, loops were checked so that there was at least one 9-residue fragment from the PDB database within 0.4Å RMSD on every position in the structure (RMSD loop threshold). To do this we used the worst9mer filter in Rosetta<sup>1</sup>. Second, the design-ability of each residue was measured by the number of pairwise side chain interactions observed in the PDB database, considering the backbone position of the two residues involved (motif score, unpublished results). Backbones with fewer than 1.5 interactions per residue were filtered out. Of the 2.88 million initial backbones 66,776 structures passed these filters.

## ***3 Sequence design - Fast***

Starting from the filtered backbone conformations, we used one pass of Rosetta design<sup>5</sup> to generate repeated sequences.

## ***4 Packing filters – Low threshold***

After completing sequence design the models were filtered out if the helices were either too far apart, creating cavities in the core (poor Rosetta holes<sup>6</sup> score, > 1.75), or too close together with an alanine-rich unspecific core packing (%alanine residues > 25%). Of the 66,7776 structures that passed centroid 11,243 pass this filter.

## ***5 Structure Profile***

The structure profile biases the sequence composition towards the sequences in native proteins with similar local structure. To construct the structural profile, the sequences from the closest 100 9-residue fragments within 0.5Å RMSD to the designed structure were used. The code to construct the structural profile is included with Rosetta as generate\_struct\_profile.rb in tools/fragment\_tools/pdb2vall. The structure profile was used in the same way as the sequence profile described by Parmeggiani *et al.*<sup>7</sup>

## **6 Sequence design – multipass**

Starting from the filtered backbone conformations, we used Rosetta design to generate repeated sequences while minimizing the overall energy<sup>4,8</sup>, increasing core packing as measured by Rosetta holes<sup>6</sup> and improving the psipred secondary structure prediction<sup>9</sup>. After the first round of sequence refinement the N and C terminal repeats (capping repeats) display exposed hydrophobic residues. The sequence design procedure was rerun for these repeats without a symmetric sequence to introduce polar amino acids.

## **7 Packing filters –High threshold**

After completing sequence design the models were filtered out for poor packing. (holes score, < 0.5). After this stage we obtained 1980 structures.

## **8 Exploration of the energy landscape**

The designs were validated using Rosetta *ab initio* structure prediction using Rosetta@Home<sup>10,11</sup>. In Rosetta *ab initio* prediction the energy landscape is explored using independent simulations starting from an extended structure. The distribution of the simulation results is expressed in terms of energy and distance from the target fold as root mean square deviation (RMSD). A successful design produces a distribution in the shape of a funnel with the minimum corresponding to low energy and low RMSD models and no alternative minima.

For each structure, seven family members were made from the same topology, some with increased hydrogen bond potential. Proteins where multiple family members had successful simulations were selected. The member of the family with the tightest folding funnel was chosen by visual inspection and the corresponding gene was ordered for experimental testing. Extended data Fig. 3 illustrates the folding funnel and sequence diversity for one topology.

For the database we have 761 structures that have at least one family member < 3.0 RMSD from the design.

## **9 Add disulphides**

Additional, versions with stabilizing inter-repeat disulphide bonds were also generated. Potential disulphides were scored using RosettaRemodel<sup>12</sup> and if the disulphide score was < 0 they were considered.

## **Time estimates**

**Backbone design:** on a single core of a Xeon E5-2650 took 104.5 seconds to build a structure with a 19H-2L-20H-3L topology, the median topology in the database. With an average design time of 104.5 seconds per model, it would take 3493 compute days on a single core to generate the 2.8 million structures.

**Sequence design – multipass:** the multipass design of sequence and capping residues takes 2.1 hours for a model with 17 length helices and 3 length loops on a single core of a Xeon E5-2650.

**Exploration of the energy landscape:** on a single core of a Xeon E7-2850 @ 2.00 GHZ a model with 17 residues helices and 3 residues loops is produced in 19.7 minutes. Where the computation was run on Rosetta@Home, the average was 26.7 minutes. With 7 sequences per family and a minimum of 1000 models to suitably explore the landscape it would take 130 compute days per structure.

**Supplementary Table 1 | Detailed protocol used for each design**

|            | asymmetric topology (a) | structure profile | RMSD loop threshold | disulphide threshold < 0.0 (b) | energy landscape exploration | no csts (c) | motif score | ABEGO type (d) | improved sampling (d) |
|------------|-------------------------|-------------------|---------------------|--------------------------------|------------------------------|-------------|-------------|----------------|-----------------------|
| DHR 1-4,9  |                         |                   |                     |                                |                              |             |             |                |                       |
| DHR 5-8,10 |                         |                   |                     |                                |                              |             |             |                |                       |
| DHR 11-18  |                         |                   |                     |                                |                              |             |             |                |                       |
| DHR 19-30  |                         |                   |                     |                                |                              |             |             |                |                       |
| DHR 56-83  |                         |                   |                     |                                |                              |             |             |                |                       |
| DHR 31-55  |                         |                   |                     |                                |                              |             |             |                |                       |

Dark grey cells indicate the computational method variants employed for groups of designs. The database described in section 1 of the supplementary corresponds to the technique used to make DHR56-83. (a) For DHR1-4,9,11-18 the repeat backbone at the centroid level was symmetric, with first and second helices and first and second loops having the same length and conformation. The design stage was not restricted, introducing structural and sequence variability between the two halves of the repeat. (b) A higher disulphide score threshold of 1.5 was initially used which resulted in many disulphide-containing structures being non-functional. (c) We initially used ambiguous constraints between the helices. Ambiguous constraints gave a score bonus to centroid models when a helix was within 10 Å to a helix in adjacent repeat. These constraints were found to disrupt loops and result in many structures that would not fold during simulations. (d) DHR31-55 contained a displacement between helices, which resulted in highly twisted structures. This displacement was observed when the ABEGO loop types GBB and BAB were coupled with specific helix lengths. An improved sampling strategy with increased number of Monte Carlo steps was also used in these cases. The other method variants indicated in the columns are described in supplementary section 1 (names underlined).

## Supplementary Discussion 2 | Geometrical parameters of Designed Helical Repeat proteins

- 1) Global parameters
- 2) Extracting parameters from naturally occurring repeats
- 3) Local parameters

### 1) Global parameters

Class 3 repeat proteins, as described by Kajava A.<sup>13</sup>, form solenoid structures that can be described in term of global helical parameters that relate the position of one repeat to the next one: radius ( $r$ ), twist or angle between adjacent repeats around the helical axis (twist,  $\omega$ ) and translation between adjacent repeats along the helical axis ( $z$ ).

Parameters for Designed Helical Repeat proteins (DHRs) and crystal structures are indicated in Supplementary Table 2, together with the C $\alpha$  RMSD values for the complete proteins. The parameters were measured on the two central repeats using the RepeatParameter filter available in Rosetta.

Radius and twist are inversely correlated and their distribution of whole set describes a hyperbolic shape, which can be represented as two symmetric ones, when considering the handedness of the superhelix in the  $\omega$  value as in Fig. 2b (+ right handed, - left handed). Handedness refers to the superhelix described by the center of mass of the repeats.  $z$  is broadly distributed, with maximum values around 16 Å (Extended Data Fig. 4).

### 2) Extracting parameters from naturally occurring repeats

A set of alpha-helical solenoid proteins were curated from the repeatsDB (category III.3.)<sup>14</sup> to remove both proteins that had above 90% sequence identity<sup>15,16</sup> and previously designed repeat proteins. After curation, 258 proteins remained out of 923. We then automatically extracted repeat units, which consisted of 3 subsequent repeats, that differed by less than 3 residues in length and had a high degree of structural similarity as measured by having a TM score<sup>17</sup> of greater than 0.75. The requirement of high structural similarity cut down the number of repeat proteins to 81. Repeat units were identified by the method described by RAPHAEL<sup>18</sup> implemented in Rosetta and improved. This method measures the distance from residues in the protein to random points placed around the protein. Equally spaced inflection points, where a residue was furthest or closest to these random points indicated the start of a repeat.

We found that inflection points occurred at random in repeat protein loops. To ensure each repeat was cut at the same location, the first residue in each repeat was chosen to be the loop-helix transition closest to the transition point. The code for this is available as

extractNativeRepeats in Rosetta after git branch c876538. After locating repeats we assigned the class name of each repeat based on the PDB assignment in the Pfam database<sup>19</sup>. The Rise/Omega/Twist parameters were calculated by superimposing the first repeat-unit onto the second using TM-align<sup>17</sup> then calling the parameter calculators and averaging the values within the same protein. This approach does not provide an extensive coverage of all the possible curvatures for each family but an indication of the protein average values.

### **3) Local parameters**

Local parameters describe the helix-helix interactions and, due to the repeating structures, only two interactions are needed to capture the local geometry: helix1.1-helix1.2 within a repeat and helix1.1-helix2.1 between first and second repeat. Angle between helices and distance between helix centers of mass were used as parameters, extracted with a modified version of the publicly available script <http://www.pymolwiki.org/index.php/AngleBetweenHelices>. Secondary structure definition were assigned using DSSP<sup>20</sup>. Values are reported in Supplementary Table 3 for designs and crystal structures. For the two central repeats, all atoms RMSDs between crystal structures and design are reported. Repeat handedness, as defined by Kobe and Kajava<sup>21</sup>, indicates the rotation of the main chain going from the N- to the C-terminal around the axis connecting the repeat centers of mass.



Supplementary Table 2 | Global geometric parameters.

| DHR | Secondary structure (residues) |        |       |        |       | Global parameters design |              |                |                 |      | Global parameters crystal |                |                 |      | Backbone RMSD (Å) |
|-----|--------------------------------|--------|-------|--------|-------|--------------------------|--------------|----------------|-----------------|------|---------------------------|----------------|-----------------|------|-------------------|
|     | Repeat length                  | helix1 | loop1 | helix2 | loop2 | disulphide               | rise (z) (Å) | radius (r) (Å) | twist (w) (rad) | hand | rise (z) (Å)              | radius (r) (Å) | twist (w) (rad) | hand |                   |
| 1   | 44                             | 18     | 4     | 18     | 4     | yes                      | 8.17         | 3.29           | 0.52            | L    |                           |                |                 |      |                   |
| 2   | 44                             | 18     | 4     | 18     | 4     |                          | 8.57         | 0.52           | 0.43            | R    |                           |                |                 |      |                   |
| 3   | 42                             | 19     | 2     | 19     | 2     | yes                      | 9.00         | 0.78           | 0.57            | L    |                           |                |                 |      |                   |
| 4   | 50                             | 21     | 4     | 21     | 4     | yes (9 with S-S)         | 8.58         | 4.93           | 0.58            | L    | 8.66                      | 2.43           | 0.54            | L    | 1.50              |
| 5   | 50                             | 21     | 4     | 21     | 4     | yes (10 with S-S)        | 4.99         | 163.77         | 0.06            | R    | 6.14                      | 80.88          | 0.11            | R    | 1.73              |
| 6   | 42                             | 17     | 4     | 17     | 4     | yes                      | 6.62         | 31.58          | 0.25            | R    |                           |                |                 |      |                   |
| 7   | 42                             | 18     | 3     | 18     | 3     | yes                      | 6.99         | 10.51          | 0.66            | L    | 7.35                      | 10.57          | 0.67            | L    | 1.30              |
| 8   | 45                             | 19     | 3     | 19     | 4     |                          | 8.97         | 2.19           | 0.40            | R    | 8.53                      | 3.44           | 0.39            | R    | 2.28              |
| 9   | 50                             | 21     | 4     | 21     | 4     |                          | 8.33         | 4.59           | 0.58            | L    |                           |                |                 |      |                   |
| 10  | 50                             | 21     | 4     | 21     | 4     |                          | 9.22         | 138.20         | 0.03            | R    | 5.46                      | 79.97          | 0.12            | R    | 1.79              |
| 11  | 44                             | 18     | 4     | 18     | 4     | yes (2 with S-S)         | 8.48         | 0.55           | 0.42            | R    |                           |                |                 |      |                   |
| 12  | 36                             | 15     | 3     | 15     | 3     | yes                      | 8.98         | 0.60           | 1.03            | L    |                           |                |                 |      |                   |
| 13  | 36                             | 15     | 3     | 15     | 3     |                          | 9.35         | 1.89           | 1.02            | L    |                           |                |                 |      |                   |
| 14  | 40                             | 17     | 3     | 17     | 3     |                          | 9.34         | 23.62          | 0.17            | L    | 3.00                      | 655.10         | 0.02            | L    | 2.38              |
| 15  | 46                             | 20     | 3     | 20     | 3     | yes                      | 9.11         | 0.58           | 0.43            | R    |                           |                |                 |      |                   |
| 16  | 44                             | 20     | 2     | 20     | 2     | yes                      | 8.62         | 0.71           | 0.50            | R    |                           |                |                 |      |                   |
| 17  | 54                             | 25     | 2     | 25     | 2     | yes                      | 8.95         | 44.91          | 0.10            | R    |                           |                |                 |      |                   |
| 18  | 60                             | 26     | 4     | 26     | 4     | yes                      | 8.82         | 1.08           | 0.36            | R    | 8.79                      | 4.16           | 0.36            | R    | 1.21              |
| 19  | 38                             | 16     | 3     | 16     | 3     |                          | 9.60         | 9.83           | 0.23            | R    |                           |                |                 |      |                   |
| 20  | 38                             | 16     | 3     | 16     | 3     |                          | 9.08         | 4.23           | 0.48            | R    |                           |                |                 |      |                   |
| 21  | 38                             | 16     | 4     | 15     | 3     |                          | 9.35         | 7.26           | 0.41            | R    |                           |                |                 |      |                   |
| 22  | 40                             | 17     | 3     | 17     | 3     |                          | 8.97         | 3.96           | 0.37            | R    |                           |                |                 |      |                   |
| 23  | 40                             | 17     | 3     | 17     | 3     |                          | 8.97         | 15.68          | 0.30            | R    |                           |                |                 |      |                   |
| 24  | 46                             | 20     | 3     | 20     | 3     | yes                      | 9.44         | 5.67           | 0.31            | R    |                           |                |                 |      |                   |
| 25  | 45                             | 20     | 3     | 19     | 3     |                          | 9.19         | 4.36           | 0.37            | R    |                           |                |                 |      |                   |
| 26  | 52                             | 23     | 3     | 24     | 2     | yes                      | 9.26         | 1.89           | 0.32            | R    |                           |                |                 |      |                   |
| 27  | 54                             | 24     | 3     | 24     | 3     |                          | 8.09         | 10.02          | 0.43            | R    |                           |                |                 |      |                   |
| 28  | 55                             | 24     | 2     | 25     | 4     |                          | 9.57         | 10.26          | 0.20            | L    |                           |                |                 |      |                   |
| 29  | 53                             | 24     | 3     | 23     | 3     |                          | 8.99         | 8.72           | 0.30            | R    |                           |                |                 |      |                   |
| 30  | 55                             | 24     | 3     | 25     | 3     |                          | 9.29         | 4.93           | 0.37            | R    |                           |                |                 |      |                   |
| 31  | 41                             | 17     | 3     | 18     | 3     |                          | 9.90         | 8.71           | 1.15            | R    |                           |                |                 |      |                   |
| 32  | 41                             | 17     | 3     | 18     | 3     |                          | 10.20        | 8.89           | 1.05            | R    |                           |                |                 |      |                   |
| 33  | 41                             | 17     | 3     | 18     | 3     |                          | 11.32        | 9.20           | 0.89            | R    |                           |                |                 |      |                   |
| 34  | 41                             | 17     | 3     | 18     | 3     | yes (33 with S-S)        | 11.30        | 8.81           | 0.88            | R    |                           |                |                 |      |                   |
| 35  | 41                             | 17     | 3     | 18     | 3     |                          | 12.21        | 1.78           | 0.50            | R    |                           |                |                 |      |                   |
| 36  | 41                             | 17     | 3     | 18     | 3     |                          | 12.29        | 7.28           | 0.94            | R    |                           |                |                 |      |                   |
| 37  | 41                             | 17     | 3     | 18     | 3     |                          | 9.51         | 10.48          | 0.87            | R    |                           |                |                 |      |                   |
| 38  | 41                             | 17     | 3     | 18     | 3     | yes (37 with S-S)        | 9.59         | 10.41          | 0.86            | R    |                           |                |                 |      |                   |
| 39  | 42                             | 17     | 3     | 19     | 3     |                          | 11.68        | 9.24           | 0.62            | R    |                           |                |                 |      |                   |
| 40  | 43                             | 17     | 3     | 20     | 3     |                          | 11.41        | 2.77           | 0.55            | R    |                           |                |                 |      |                   |
| 41  | 57                             | 24     | 3     | 27     | 3     | yes                      | 12.11        | 5.17           | 0.36            | R    |                           |                |                 |      |                   |
| 42  | 57                             | 24     | 3     | 27     | 3     |                          | 7.58         | 27.02          | 0.33            | R    |                           |                |                 |      |                   |
| 43  | 57                             | 24     | 3     | 27     | 3     |                          | 8.16         | 17.72          | 0.40            | R    |                           |                |                 |      |                   |
| 44  | 35                             | 16     | 3     | 14     | 2     |                          | 9.45         | 23.98          | 0.33            | R    |                           |                |                 |      |                   |
| 45  | 35                             | 16     | 3     | 14     | 2     |                          | 5.81         | 24.08          | 0.35            | R    |                           |                |                 |      |                   |
| 46  | 39                             | 16     | 3     | 17     | 3     |                          | 7.65         | 22.79          | 0.37            | R    |                           |                |                 |      |                   |
| 47  | 39                             | 16     | 3     | 17     | 3     | yes (46 with S-S)        | 8.05         | 25.79          | 0.31            | R    |                           |                |                 |      |                   |
| 48  | 40                             | 17     | 3     | 17     | 3     |                          | 7.54         | 26.84          | 0.24            | R    |                           |                |                 |      |                   |
| 49  | 40                             | 18     | 2     | 17     | 3     |                          | 2.31         | 54.74          | 0.18            | L    | 3.88                      | 102.53         | 0.09            | L    | 0.87              |
| 50  | 43                             | 17     | 4     | 19     | 3     |                          | 0.49         | 45.48          | 0.27            | R    |                           |                |                 |      |                   |
| 51  | 43                             | 17     | 4     | 19     | 3     |                          | 7.44         | 26.16          | 0.28            | L    |                           |                |                 |      |                   |
| 52  | 43                             | 17     | 4     | 19     | 3     | yes (51 with S-S)        | 8.58         | 22.87          | 0.20            | L    |                           |                |                 |      |                   |
| 53  | 43                             | 19     | 3     | 17     | 4     |                          | 9.92         | 24.75          | 0.29            | R    | 6.87                      | 29.40          | 0.37            | R    | 1.33              |
| 54  | 43                             | 20     | 3     | 18     | 2     |                          | 8.76         | 15.10          | 0.26            | L    | 8.67                      | 16.08          | 0.25            | L    | 0.93              |
| 55  | 46                             | 20     | 3     | 20     | 3     |                          | 3.30         | 53.00          | 0.18            | R    |                           |                |                 |      |                   |
| 56  | 46                             | 20     | 3     | 20     | 3     | yes (55 with S-S)        | 3.47         | 51.28          | 0.19            | R    |                           |                |                 |      |                   |
| 57  | 47                             | 20     | 3     | 21     | 3     |                          | 9.20         | 18.46          | 0.26            | R    |                           |                |                 |      |                   |
| 58  | 47                             | 20     | 3     | 21     | 3     | yes (57 with S-S)        | 8.84         | 22.57          | 0.23            | R    |                           |                |                 |      |                   |
| 59  | 48                             | 20     | 3     | 22     | 3     |                          | 8.05         | 9.56           | 0.38            | R    |                           |                |                 |      |                   |
| 60  | 33                             | 16     | 2     | 12     | 3     |                          | 5.26         | 18.45          | 0.53            | R    |                           |                |                 |      |                   |
| 61  | 33                             | 16     | 2     | 12     | 3     | yes (60 with S-S)        | 4.77         | 19.96          | 0.50            | R    |                           |                |                 |      |                   |
| 62  | 43                             | 20     | 3     | 17     | 3     |                          | 4.68         | 27.38          | 0.37            | R    |                           |                |                 |      |                   |
| 63  | 54                             | 24     | 3     | 25     | 2     |                          | 5.66         | 27.68          | 0.32            | R    |                           |                |                 |      |                   |
| 64  | 57                             | 24     | 3     | 27     | 3     |                          | 4.52         | 27.91          | 0.37            | R    |                           |                |                 |      |                   |
| 65  | 57                             | 24     | 3     | 27     | 3     | yes (64 with S-S)        | 3.73         | 26.63          | 0.41            | R    | 3.04                      | 32.27          | 0.36            | R    | 1.54              |
| 66  | 54                             | 26     | 3     | 23     | 2     |                          | 6.83         | 13.24          | 0.49            | R    |                           |                |                 |      |                   |
| 67  | 60                             | 27     | 3     | 27     | 3     |                          | 9.20         | 50.96          | 0.08            | R    |                           |                |                 |      |                   |
| 68  | 61                             | 27     | 3     | 27     | 4     |                          | 3.22         | 24.75          | 0.46            | R    |                           |                |                 |      |                   |
| 69  | 62                             | 27     | 3     | 28     | 4     |                          | 5.47         | 17.89          | 0.58            | R    |                           |                |                 |      |                   |
| 70  | 50                             | 19     | 4     | 25     | 2     |                          | 1.99         | 28.94          | 0.41            | R    |                           |                |                 |      |                   |
| 71  | 50                             | 20     | 3     | 25     | 2     |                          | 4.82         | 43.07          | 0.23            | R    | 5.12                      | 49.02          | 0.21            | R    | 0.67              |
| 72  | 37                             | 20     | 4     | 11     | 2     |                          | 1.33         | 27.28          | 0.44            | L    |                           |                |                 |      |                   |
| 73  | 50                             | 21     | 2     | 25     | 2     |                          | 0.42         | 12.18          | 0.95            | R    |                           |                |                 |      |                   |
| 74  | 55                             | 22     | 4     | 27     | 2     |                          | 4.84         | 19.87          | 0.46            | R    |                           |                |                 |      |                   |
| 75  | 51                             | 26     | 3     | 20     | 2     |                          | 2.23         | 26.87          | 0.47            | L    |                           |                |                 |      |                   |
| 76  | 55                             | 26     | 3     | 23     | 3     |                          | 7.31         | 30.53          | 0.27            | R    | 5.92                      | 25.09          | 0.37            | L    | 1.73              |
| 77  | 51                             | 27     | 2     | 19     | 3     |                          | 2.30         | 20.24          | 0.68            | L    |                           |                |                 |      |                   |
| 78  | 51                             | 27     | 2     | 19     | 3     | yes (77 with S-S)        | 2.17         | 19.77          | 0.70            | L    |                           |                |                 |      |                   |
| 79  | 56                             | 27     | 2     | 23     | 4     |                          | 6.86         | 22.51          | 0.42            | R    | 8.61                      | 23.89          | 0.32            | R    | 1.04              |
| 80  | 57                             | 28     | 2     | 24     | 3     |                          | 0.84         | 12.10          | 1.01            | R    |                           |                |                 |      |                   |
| 81  | 57                             | 28     | 2     | 24     | 3     | yes (80 with S-S)        | 0.60         | 12.27          | 1.00            | R    | 0.87                      | 12.29          | 1.00            | R    | 0.65              |
| 82  | 58                             | 28     | 2     | 24     | 4     |                          | 7.41         | 18.85          | 0.47            | R    |                           |                |                 |      |                   |
| 83  | 58                             | 28     | 2     | 24     | 4     | yes (82 with S-S)        | 7.61         | 18.88          | 0.44            | R    |                           |                |                 |      |                   |

For each design, repeat size, secondary structure length and presence of disulphide bonds are indicated. Designs and crystal structures are compared based on global parameters  $r$ ,  $z$ ,  $\omega$  and handedness of the super helix. Parameters are calculated within the two central repeats. Backbone RMSD refers to the whole protein.

### Supplementary Table 3 | Local geometric parameters

| DHR | Secondary structure (residues) |        |       |        | Local parameters design |                           |                        |                           |                        | Local parameters crystal |                           |                        |                           |                        | RMSD (Å) |      |
|-----|--------------------------------|--------|-------|--------|-------------------------|---------------------------|------------------------|---------------------------|------------------------|--------------------------|---------------------------|------------------------|---------------------------|------------------------|----------|------|
|     | length                         | helix1 | loop1 | helix2 | loop2                   | angle H1.1-<br>H1.2 (deg) | dist H1.1-<br>H1.2 (Å) | angle H1.1-<br>H2.1 (deg) | dist H1.1-<br>H2.1 (Å) | hand                     | angle H1.1-<br>H1.2 (deg) | dist H1.1-<br>H1.2 (Å) | angle H1.1-<br>H2.1 (deg) | dist H1.1-<br>H2.1 (Å) |          | hand |
| 1   | 44                             | 18     | 4     | 18     | 4                       | 156.8                     | 10.75                  | 29.67                     | 8.48                   | R                        |                           |                        |                           |                        |          |      |
| 2   | 44                             | 18     | 4     | 18     | 4                       | 174.28                    | 11.11                  | 24.44                     | 8.83                   | L                        |                           |                        |                           |                        |          |      |
| 3   | 42                             | 19     | 2     | 19     | 2                       | 161.77                    | 9.98                   | 32.68                     | 9.35                   | R                        |                           |                        |                           |                        |          |      |
| 4   | 50                             | 21     | 4     | 21     | 4                       | 157.54                    | 11.06                  | 31.44                     | 8.62                   | R                        | 162.43                    | 11.85                  | 31.08                     | 8.97                   | R        | 0.78 |
| 5   | 50                             | 21     | 4     | 21     | 4                       | 134.73                    | 10.9                   | 2.29                      | 10.18                  | L                        | 144.04                    | 11.63                  | 6.51                      | 10.19                  | L        | 1.66 |
| 6   | 42                             | 17     | 4     | 17     | 4                       | 130.79                    | 11.12                  | 12.64                     | 9.52                   | L                        |                           |                        |                           |                        |          |      |
| 7   | 42                             | 18     | 3     | 18     | 3                       | 174.62                    | 8.69                   | 37.03                     | 8.06                   | R                        | 175.48                    | 8.8                    | 38.16                     | 8.4                    | R        | 0.39 |
| 8   | 45                             | 19     | 3     | 19     | 4                       | 168.52                    | 9.89                   | 21.33                     | 9.51                   | L                        | 166.97                    | 10.5                   | 22.09                     | 9.03                   | L        | 1.51 |
| 9   | 50                             | 21     | 4     | 21     | 4                       | 158.68                    | 11.66                  | 30.35                     | 8.02                   | R                        |                           |                        |                           |                        |          |      |
| 10  | 50                             | 21     | 4     | 21     | 4                       | 137.21                    | 11.35                  | 1.85                      | 10.36                  | L                        | 143.83                    | 11.53                  | 6.38                      | 10.2                   | L        | 1.57 |
| 11  | 44                             | 18     | 4     | 18     | 4                       | 174.52                    | 11.12                  | 24.3                      | 8.82                   | L                        |                           |                        |                           |                        |          |      |
| 12  | 36                             | 15     | 3     | 15     | 3                       | 141.47                    | 9.3                    | 57.87                     | 10.02                  | R                        |                           |                        |                           |                        |          |      |
| 13  | 36                             | 15     | 3     | 15     | 3                       | 139.33                    | 10.33                  | 55.94                     | 10.41                  | R                        |                           |                        |                           |                        |          |      |
| 14  | 40                             | 17     | 3     | 17     | 3                       | 169.4                     | 10.87                  | 9                         | 10                     | R                        | 155.64                    | 11.14                  | 0.35                      | 11.28                  | R        | 1.64 |
| 15  | 46                             | 20     | 3     | 20     | 3                       | 168.37                    | 11.6                   | 24.49                     | 9.41                   | L                        |                           |                        |                           |                        |          |      |
| 16  | 44                             | 20     | 2     | 20     | 2                       | 163.78                    | 10.66                  | 28.58                     | 9.03                   | L                        |                           |                        |                           |                        |          |      |
| 17  | 54                             | 25     | 2     | 25     | 2                       | 176.63                    | 9.4                    | 5.31                      | 9.92                   | R                        |                           |                        |                           |                        |          |      |
| 18  | 60                             | 26     | 4     | 26     | 4                       | 164.82                    | 8.95                   | 20.21                     | 8.94                   | L                        | 166.67                    | 9.25                   | 19.99                     | 8.78                   | L        | 0.61 |
| 19  | 38                             | 16     | 3     | 16     | 3                       | 170.03                    | 9.38                   | 13.54                     | 10.15                  | L                        |                           |                        |                           |                        |          |      |
| 20  | 38                             | 16     | 3     | 16     | 3                       | 169.89                    | 9.32                   | 27.33                     | 10                     | L                        |                           |                        |                           |                        |          |      |
| 21  | 38                             | 16     | 4     | 15     | 3                       | 167.52                    | 9.16                   | 21.84                     | 9.41                   | L                        |                           |                        |                           |                        |          |      |
| 22  | 40                             | 17     | 3     | 17     | 3                       | 155.85                    | 12.04                  | 20.61                     | 9.01                   | L                        |                           |                        |                           |                        |          |      |
| 23  | 40                             | 17     | 3     | 17     | 3                       | 160.85                    | 10.99                  | 14.51                     | 9.65                   | L                        |                           |                        |                           |                        |          |      |
| 24  | 46                             | 20     | 3     | 20     | 3                       | 175.06                    | 9.25                   | 16.65                     | 9.48                   | L                        |                           |                        |                           |                        |          |      |
| 25  | 45                             | 20     | 3     | 19     | 3                       | 171.37                    | 10.52                  | 21.42                     | 9.63                   | L                        |                           |                        |                           |                        |          |      |
| 26  | 52                             | 23     | 3     | 24     | 2                       | 176.91                    | 9.94                   | 18.68                     | 9.46                   | L                        |                           |                        |                           |                        |          |      |
| 27  | 54                             | 24     | 3     | 24     | 3                       | 166.13                    | 10.63                  | 21.81                     | 10.09                  | L                        |                           |                        |                           |                        |          |      |
| 28  | 55                             | 24     | 2     | 25     | 4                       | 172.03                    | 10.6                   | 11.42                     | 9.67                   | R                        |                           |                        |                           |                        |          |      |
| 29  | 53                             | 24     | 3     | 23     | 3                       | 177.57                    | 10.36                  | 16.18                     | 9.13                   | L                        |                           |                        |                           |                        |          |      |
| 30  | 55                             | 24     | 3     | 25     | 3                       | 159.21                    | 12.09                  | 19.87                     | 9.38                   | L                        |                           |                        |                           |                        |          |      |
| 31  | 41                             | 17     | 3     | 18     | 3                       | 133.32                    | 8.73                   | 31.18                     | 11.06                  | L                        |                           |                        |                           |                        |          |      |
| 32  | 41                             | 17     | 3     | 18     | 3                       | 134.3                     | 9.08                   | 30.84                     | 11.01                  | L                        |                           |                        |                           |                        |          |      |
| 33  | 41                             | 17     | 3     | 18     | 3                       | 138.39                    | 9.15                   | 31.37                     | 12.29                  | L                        |                           |                        |                           |                        |          |      |
| 34  | 41                             | 17     | 3     | 18     | 3                       | 137.61                    | 9.07                   | 29.33                     | 11.99                  | L                        |                           |                        |                           |                        |          |      |
| 35  | 41                             | 17     | 3     | 18     | 3                       | 136.85                    | 10.75                  | 25.65                     | 12.37                  | L                        |                           |                        |                           |                        |          |      |
| 36  | 41                             | 17     | 3     | 18     | 3                       | 140.84                    | 10.35                  | 41.58                     | 13.69                  | L                        |                           |                        |                           |                        |          |      |
| 37  | 41                             | 17     | 3     | 18     | 3                       | 143.68                    | 8.91                   | 21.15                     | 10.8                   | L                        |                           |                        |                           |                        |          |      |
| 38  | 41                             | 17     | 3     | 18     | 3                       | 143.75                    | 8.94                   | 21.33                     | 10.82                  | L                        |                           |                        |                           |                        |          |      |
| 39  | 42                             | 17     | 3     | 19     | 3                       | 138.82                    | 9.73                   | 31.66                     | 13.03                  | L                        |                           |                        |                           |                        |          |      |
| 40  | 43                             | 17     | 3     | 20     | 3                       | 152.32                    | 11.83                  | 31.58                     | 12.44                  | L                        |                           |                        |                           |                        |          |      |
| 41  | 57                             | 24     | 3     | 27     | 3                       | 166.91                    | 9.43                   | 18.47                     | 12.35                  | L                        |                           |                        |                           |                        |          |      |
| 42  | 57                             | 24     | 3     | 27     | 3                       | 167.37                    | 10                     | 16.6                      | 12.83                  | L                        |                           |                        |                           |                        |          |      |
| 43  | 57                             | 24     | 3     | 27     | 3                       | 169.58                    | 11.15                  | 22.58                     | 11.65                  | L                        |                           |                        |                           |                        |          |      |
| 44  | 35                             | 16     | 3     | 14     | 2                       | 149.56                    | 9.71                   | 17.62                     | 12.78                  | R                        |                           |                        |                           |                        |          |      |
| 45  | 35                             | 16     | 3     | 14     | 2                       | 160.61                    | 10.12                  | 19.54                     | 9.85                   | L                        |                           |                        |                           |                        |          |      |
| 46  | 39                             | 16     | 3     | 17     | 3                       | 151.16                    | 9.97                   | 20.31                     | 12.23                  | R                        |                           |                        |                           |                        |          |      |
| 47  | 39                             | 16     | 3     | 17     | 3                       | 153.86                    | 10.02                  | 17.2                      | 12.19                  | R                        |                           |                        |                           |                        |          |      |
| 48  | 40                             | 17     | 3     | 17     | 3                       | 148.53                    | 11.62                  | 13.56                     | 10.09                  | L                        |                           |                        |                           |                        |          |      |
| 49  | 40                             | 18     | 2     | 17     | 3                       | 171.04                    | 9.84                   | 4.95                      | 10.68                  | R                        | 172.61                    | 10.14                  | 1.19                      | 10.14                  | R        | 0.43 |
| 50  | 43                             | 17     | 4     | 19     | 3                       | 160.01                    | 8.66                   | 7.63                      | 11.06                  | R                        |                           |                        |                           |                        |          |      |
| 51  | 43                             | 17     | 4     | 19     | 3                       | 160.09                    | 9.61                   | 9.43                      | 11.37                  | R                        |                           |                        |                           |                        |          |      |
| 52  | 43                             | 17     | 4     | 19     | 3                       | 160.81                    | 9.44                   | 8.84                      | 10.08                  | R                        |                           |                        |                           |                        |          |      |
| 53  | 43                             | 19     | 3     | 17     | 4                       | 154.71                    | 10.08                  | 16.36                     | 12.8                   | R                        | 147.57                    | 9.78                   | 24.51                     | 13.23                  | R        | 0.47 |
| 54  | 43                             | 20     | 3     | 18     | 2                       | 170.64                    | 9.19                   | 14.7                      | 9.28                   | R                        | 166.61                    | 9.5                    | 15.71                     | 9.6                    | R        | 0.54 |
| 55  | 46                             | 20     | 3     | 20     | 3                       | 169.91                    | 9.83                   | 7.17                      | 10.91                  | L                        |                           |                        |                           |                        |          |      |
| 56  | 46                             | 20     | 3     | 20     | 3                       | 170.09                    | 9.84                   | 7.56                      | 10.91                  | L                        |                           |                        |                           |                        |          |      |
| 57  | 47                             | 20     | 3     | 21     | 3                       | 167.95                    | 10.21                  | 14.85                     | 10.49                  | R                        |                           |                        |                           |                        |          |      |
| 58  | 47                             | 20     | 3     | 21     | 3                       | 168.06                    | 10.27                  | 13.27                     | 10.47                  | R                        |                           |                        |                           |                        |          |      |
| 59  | 48                             | 20     | 3     | 22     | 3                       | 177.91                    | 9.69                   | 19.14                     | 9.73                   | L                        |                           |                        |                           |                        |          |      |
| 60  | 33                             | 16     | 2     | 12     | 3                       | 169.11                    | 8.87                   | 21.61                     | 9.54                   | L                        |                           |                        |                           |                        |          |      |
| 61  | 33                             | 16     | 2     | 12     | 3                       | 172.51                    | 8.71                   | 18.7                      | 9.54                   | L                        |                           |                        |                           |                        |          |      |
| 62  | 43                             | 20     | 3     | 17     | 3                       | 168.49                    | 7.63                   | 15.78                     | 12.08                  | R                        |                           |                        |                           |                        |          |      |
| 63  | 54                             | 24     | 3     | 25     | 2                       | 164.1                     | 8.58                   | 12.75                     | 11.73                  | R                        |                           |                        |                           |                        |          |      |
| 64  | 57                             | 24     | 3     | 27     | 3                       | 167.98                    | 9.42                   | 13.33                     | 10.37                  | R                        | 167.72                    | 10.06                  | 11.33                     | 10.97                  | R        | 0.83 |
| 65  | 57                             | 24     | 3     | 27     | 3                       | 167.31                    | 9.53                   | 12.65                     | 10.36                  | R                        |                           |                        |                           |                        |          |      |
| 66  | 54                             | 26     | 3     | 23     | 2                       | 164.48                    | 9.68                   | 23.75                     | 8.13                   | L                        |                           |                        |                           |                        |          |      |
| 67  | 60                             | 27     | 3     | 27     | 3                       | 178.59                    | 9.72                   | 4.07                      | 10.19                  | L                        |                           |                        |                           |                        |          |      |
| 68  | 61                             | 27     | 3     | 27     | 4                       | 166.7                     | 8.97                   | 11.61                     | 10.38                  | R                        |                           |                        |                           |                        |          |      |
| 69  | 62                             | 27     | 3     | 28     | 4                       | 163.82                    | 8.34                   | 21.36                     | 10.07                  | R                        |                           |                        |                           |                        |          |      |
| 70  | 50                             | 19     | 4     | 25     | 2                       | 165.2                     | 9.56                   | 10.82                     | 10.71                  | R                        |                           |                        |                           |                        |          |      |
| 71  | 50                             | 20     | 3     | 25     | 2                       | 163.25                    | 9.08                   | 7.76                      | 10.3                   | R                        | 167.15                    | 9.28                   | 7.31                      | 10.74                  | R        | 0.29 |
| 72  | 37                             | 20     | 4     | 11     | 2                       | 174.75                    | 8.21                   | 15.03                     | 10.75                  | L                        |                           |                        |                           |                        |          |      |
| 73  | 50                             | 21     | 2     | 25     | 2                       | 162.52                    | 9.25                   | 17.32                     | 8.51                   | R                        |                           |                        |                           |                        |          |      |
| 74  | 55                             | 22     | 4     | 27     | 2                       | 168.31                    | 9.21                   | 20.15                     | 12.06                  | L                        |                           |                        |                           |                        |          |      |
| 75  | 51                             | 26     | 3     | 20     | 2                       | 170                       | 8.06                   | 14.85                     | 11.41                  | L                        |                           |                        |                           |                        |          |      |
| 76  | 55                             | 26     | 3     | 23     | 3                       | 169.93                    | 9.68                   | 14.46                     | 10.36                  | L                        | 164.79                    | 10.14                  | 18.85                     | 9.91                   | L        | 1.23 |
| 77  | 51                             | 27     | 2     | 19     | 3                       | 165.14                    | 9.13                   | 24.04                     | 11.49                  | L                        |                           |                        |                           |                        |          |      |
| 78  | 51                             | 27     | 2     | 19     | 3                       | 165.31                    | 9.07                   | 24.48                     | 11.33                  | L                        |                           |                        |                           |                        |          |      |
| 79  | 56                             | 27     | 2     | 23     | 4                       | 175.56                    | 9.45                   | 22.63                     | 10.36                  | L                        | 172.81                    | 9.59                   | 17.92                     | 10.56                  | L        | 0.98 |
| 80  | 57                             | 28     | 2     | 24     | 3                       | 161.22                    | 7.9                    | 28.78                     | 14.76                  | R                        |                           |                        |                           |                        |          |      |
| 81  | 57                             | 28     | 2     | 24     | 3                       | 161.44                    | 7.89                   | 28.66                     | 14.75                  | R                        | 161.91                    | 8.04                   | 27.47                     | 14.81                  | R        | 0.42 |
| 82  | 58                             | 28     | 2     | 24     | 4                       | 163.71                    | 7.95                   | 24.37                     | 12.57                  | R                        |                           |                        |                           |                        |          |      |
| 83  | 58                             | 28     | 2     | 24     | 4                       | 163.37                    | 8.05                   | 23.8                      | 12.26                  | R                        |                           |                        |                           |                        |          |      |

For each design, repeat size and secondary structure length is indicated. Local parameters (angle and distance between helix1 of repeat1 and helix2 of repeat 1; angle and distance between helix1 of repeat1 and helix1 of repeat 2) and handedness of the repeat for designs and crystal structures are indicated. Angles, distances and RMSD are calculated within the two central repeats.

### **Supplementary Discussion 3 | Structure and sequence comparison**

Structural comparison of experimentally validated designs with representative repeat proteins from repeatDB<sup>14</sup> revealed that DHRs cluster in different families than the existing repeat proteins (Extended Data Fig. 8). Additionally, designs are equally distributed between right-handed and left-handed architecture, as referred to the repeat handedness (see local parameters above), in contrast to known alpha helical repeat proteins, which are mostly right-handed. This result indicates that the handedness observed is not an intrinsic limitation of repeat proteins structures but the result of a bias during evolution.

At the sequence level, DHRs are expected to be similar to repeat proteins with high units formed by two helices, like tetratricopeptide repeats (TPR). The results of BLAST<sup>22</sup> searches over non-redundant NR NCBI database with an e-value cutoff of 0.0001 indicate that no characterized repeat protein was identified among the top hits (Supplementary Table 4).

HHsearch<sup>23</sup> comparison of single repeat sequences with the whole Pfam profile database<sup>19</sup>, shows a similar trend (Supplementary Table 4), revealing that the hits are generally only very weak (Prob, E-value, P-value, score) and often rely only on a subset of position (Cols compared to repeat size). For several designs the first repeat protein hit is not among the first hits (see rank) and in some cases no similarity to repeat protein Hidden Markov Models is detected (n.d.). As reference helical proteins for this search, the ANK and TPR clans were considered, as well as spectrin and mterf families. Most helical repeat proteins (e.g. ARM, PPR, HAT, PUF) are included in the TPR clan.

## Supplementary Table 4 | Sequence comparison

| Blast |                                                                     |              |          | HHsearch |         |            |       |         |          |       |      |      |
|-------|---------------------------------------------------------------------|--------------|----------|----------|---------|------------|-------|---------|----------|-------|------|------|
| DHR   | top hits                                                            | Score (bits) | E-value  | rank     | PFAM    | family     | Prob. | E-value | P-value  | score | cols | size |
| 1     | n.d.                                                                |              |          | 2        | PF13431 | TPR_17     | 61.9  | 1.1     | 7.60E-05 | 19.3  | 20   | 44   |
| 2     | n.d.                                                                |              |          | 8        | PF07719 | TPR_2      | 18.7  | 19      | 0.0013   | 13.4  | 13   | 44   |
| 3     | n.d.                                                                |              |          | 1        | PF02854 | MIF4G      | 55.4  | 1.7     | 0.00012  | 21.7  | 28   | 42   |
| 4     | n.d.                                                                |              |          | 41       | PF02536 | mTERF      | 44.2  | 3.4     | 0.00023  | 24.2  | 26   | 50   |
| 5     | n.d.                                                                |              |          | 33       | PF12862 | Apc5       | 26.2  | 11      | 0.00071  | 18.9  | 18   | 50   |
| 6     | n.d.                                                                |              |          | 1        | PF14938 | SNAP       | 86.2  | 0.073   | 4.90E-06 | 30.9  | 37   | 42   |
| 7     | n.d.                                                                |              |          | n.d.     |         |            |       |         |          |       |      | 42   |
| 8     | n.d.                                                                |              |          | n.d.     |         |            |       |         |          |       |      | 45   |
| 9     | n.d.                                                                |              |          | 49       | PF02536 | mTERF      | 40.8  | 4.2     | 0.00028  | 23.8  | 26   | 50   |
| 10    | n.d.                                                                |              |          | n.d.     |         |            |       |         |          |       |      | 50   |
| 11    | n.d.                                                                |              |          | 7        | PF07719 | TPR_2      | 19.7  | 17      | 0.0012   | 13.5  | 13   | 44   |
| 12    | ref XP_003971230.1  PREDICTED: procollagen C-endopeptidase enhan... | 57           | 3.00E-06 | n.d.     |         |            |       |         |          |       |      | 36   |
| 13    | gb ETN86505.1  hypothetical protein NECAME_16287 [Necator americ... | 54           | 3.00E-05 | 10       | PF13812 | PPR_3      | 43.2  | 3.7     | 0.00025  | 15.2  | 26   | 36   |
| 14    | n.d.                                                                |              |          | 7        | PF12862 | Apc5       | 33.8  | 6.4     | 0.00043  | 19    | 30   | 40   |
| 15    | n.d.                                                                |              |          | 5        | PF05918 | API5       | 27.4  | 9.8     | 0.00066  | 26.3  | 25   | 46   |
| 16    | n.d.                                                                |              |          | 7        | PF12862 | Apc5       | 32.2  | 7.1     | 0.00048  | 19.1  | 23   | 44   |
| 17    | ref XP_004079406.1  PREDICTED: laminin subunit alpha-3-like [Ory... | 56           | 2.00E-05 | n.d.     |         |            |       |         |          |       |      | 54   |
| 18    | ref XP_002165606.2  PREDICTED: uncharacterized protein LOC100202... | 62           | 2.00E-07 | 1        | PF13174 | TPR_6      | 51    | 2.3     | 0.00015  | 17.1  | 12   | 60   |
| 19    | ref XP_001634212.1  predicted protein [Nematostella vectensis] >... | 60           | 6.00E-07 | 2        | PF12862 | Apc5       | 73.3  | 0.45    | 3.00E-05 | 23.3  | 26   | 38   |
| 20    | n.d.                                                                |              |          | 6        | PF12862 | Apc5       | 33.2  | 6.7     | 0.00045  | 18.7  | 25   | 38   |
| 21    | n.d.                                                                |              |          | 6        | PF13525 | YfiO       | 31.1  | 7.6     | 0.00051  | 20.6  | 23   | 38   |
| 22    | n.d.                                                                |              |          | n.d.     |         |            |       |         |          |       |      | 40   |
| 23    | ref XP_005533922.1  PREDICTED: LOW QUALITY PROTEIN: staphylococ...  | 54           | 3.00E-05 | n.d.     |         |            |       |         |          |       |      | 40   |
| 24    | ref WP_003781896.1  anaphase-promoting protein subunit 3 [Actino... | 52           | 2.00E-04 | 12       | PF00637 | Clathrin   | 37.7  | 5.1     | 0.00034  | 20    | 24   | 46   |
| 25    | n.d.                                                                |              |          | 8        | PF11865 | DUF3385    | 31.5  | 7.4     | 0.0005   | 21.5  | 28   | 45   |
| 26    | ref WP_006717233.1  S6 family IgA-specific metalloendopeptidase/... | 61           | 3.00E-07 | 2        | PF03224 | V-ATPaseHN | 56.4  | 1.6     | 0.00011  | 26.4  | 34   | 52   |
| 27    | ref WP_006717233.1  S6 family IgA-specific metalloendopeptidase/... | 57           | 8.00E-06 | n.d.     |         |            |       |         |          |       |      | 54   |
| 28    | ref WP_006717233.1  S6 family IgA-specific metalloendopeptidase/... | 55           | 3.00E-05 | 5        | PF13371 | TPR_9      | 27.8  | 9.5     | 0.00064  | 17.1  | 20   | 55   |
| 29    | ref XP_005533922.1  PREDICTED: LOW QUALITY PROTEIN: staphylococ...  | 52           | 1.00E-04 | 20       | PF12348 | CLASP_N    | 22.5  | 14      | 0.00093  | 20.2  | 40   | 53   |
| 30    | ref XP_004688608.1  PREDICTED: laminin subunit gamma-1 [Condytur... | 50           | 6.00E-04 | 21       | PF13174 | TPR_6      | 24.4  | 12      | 0.00081  | 14.4  | 16   | 55   |
| 31    | n.d.                                                                |              |          | 5        | PF13174 | TPR_6      | 70.8  | 0.56    | 3.80E-05 | 18    | 23   | 41   |
| 32    | ref WP_006717233.1  S6 family IgA-specific metalloendopeptidase/... | 50           | 4.00E-04 | 8        | PF13174 | TPR_6      | 59.6  | 1.3     | 8.90E-05 | 16.8  | 20   | 41   |
| 33    | n.d.                                                                |              |          | 9        | PF13174 | TPR_6      | 37.6  | 5.1     | 0.00034  | 14.9  | 19   | 41   |
| 34    | n.d.                                                                |              |          | n.d.     |         |            |       |         |          |       |      | 41   |
| 35    | n.d.                                                                |              |          | n.d.     |         |            |       |         |          |       |      | 41   |
| 36    | n.d.                                                                |              |          | 27       | PF12862 | Apc5       | 37.1  | 5.3     | 0.00035  | 19.4  | 15   | 41   |
| 37    | n.d.                                                                |              |          | 4        | PF13606 | Ank_3      | 70.7  | 0.57    | 3.80E-05 | 19.8  | 14   | 41   |
| 38    | n.d.                                                                |              |          | 14       | PF00023 | Ank        | 30.7  | 7.8     | 0.00053  | 15.3  | 16   | 41   |
| 39    | ref NP_908998.1  retrotransposon-like protein 1 [Mus musculus] >... | 51           | 2.00E-04 | 3        | PF13812 | PPR_3      | 73.8  | 0.43    | 2.90E-05 | 18.7  | 17   | 42   |
| 40    | n.d.                                                                |              |          | 76       | PF10516 | SHNI-TPR   | 35.7  | 5.7     | 0.00039  | 18.1  | 14   | 43   |
| 41    | n.d.                                                                |              |          | n.d.     |         |            |       |         |          |       |      | 57   |
| 42    | n.d.                                                                |              |          | 5        | PF13374 | TPR_10     | 50.1  | 2.4     | 0.00016  | 17.4  | 17   | 57   |
| 43    | ref XP_965543.1  hypothetical protein NCU01912 [Neurospora crass... | 57           | 1.00E-05 | n.d.     |         |            |       |         |          |       |      | 57   |
| 44    | ref YP_001389869.1  cell wall-associated hydrolase [Clostridium ... | 50           | 4.00E-04 | 16       | PF13646 | HEAT_2     | 24.3  | 12      | 0.00081  | 15.9  | 18   | 35   |
| 45    | n.d.                                                                |              |          | n.d.     |         |            |       |         |          |       |      | 35   |
| 46    | ref YP_005677090.1  N-acetylmuramoyl-L-alanine amidase [Clostrid... | 52           | 1.00E-04 | 1        | PF14852 | Fis1_TPR_N | 90.6  | 0.019   | 1.30E-06 | 26.7  | 26   | 39   |
| 47    | n.d.                                                                |              |          | 11       | PF14852 | Fis1_TPR_N | 57.8  | 1.5     | 0.0001   | 19.8  | 21   | 39   |
| 48    | n.d.                                                                |              |          | 7        | PF13041 | PPR_2      | 71.5  | 0.53    | 3.60E-05 | 20.4  | 22   | 40   |
| 49    | ref XP_003872552.1  conserved hypothetical protein [Leishmania m... | 56           | 8.00E-06 | 1        | PF12862 | Apc5       | 80.5  | 0.2     | 1.30E-05 | 25    | 30   | 40   |
| 50    | n.d.                                                                |              |          | 4        | PF13525 | YfiO       | 36.5  | 5.4     | 0.00037  | 21.7  | 29   | 43   |
| 51    | n.d.                                                                |              |          | 1        | PF13174 | TPR_6      | 67.4  | 0.75    | 5.10E-05 | 17.7  | 17   | 43   |
| 52    | n.d.                                                                |              |          | 2        | PF13174 | TPR_6      | 69.5  | 0.63    | 4.20E-05 | 18    | 17   | 43   |
| 53    | n.d.                                                                |              |          | 1        | PF13174 | TPR_6      | 69.1  | 0.65    | 4.40E-05 | 17.9  | 18   | 43   |
| 54    | ref XP_002544663.1  predicted protein [Uncinocarpus reesii 1704]... | 51           | 2.00E-04 | 1        | PF12862 | Apc5       | 81.1  | 0.18    | 1.20E-05 | 25.4  | 27   | 43   |
| 55    | gb ETW54908.1  hypothetical protein PFUGPA_02731 [Plasmodium fal... | 52           | 1.00E-04 | 7        | PF13374 | TPR_10     | 39.1  | 4.7     | 0.00031  | 15.8  | 16   | 46   |
| 56    | n.d.                                                                |              |          | 12       | PF13374 | TPR_10     | 35.4  | 5.8     | 0.00039  | 15.5  | 16   | 46   |
| 57    | n.d.                                                                |              |          | 5        | PF12862 | Apc5       | 32.2  | 7.1     | 0.00048  | 19.3  | 18   | 47   |
| 58    | n.d.                                                                |              |          | 4        | PF03704 | BTAD       | 31.6  | 7.4     | 0.0005   | 19.5  | 31   | 47   |
| 59    | n.d.                                                                |              |          | 1        | PF12862 | Apc5       | 81.7  | 0.17    | 1.10E-05 | 26.1  | 26   | 48   |
| 60    | ref XP_001350389.1  conserved Plasmodium protein, unknown functi... | 49           | 8.00E-04 | n.d.     |         |            |       |         |          |       |      | 33   |
| 61    | n.d.                                                                |              |          | n.d.     |         |            |       |         |          |       |      | 33   |
| 62    | ref XP_003872552.1  conserved hypothetical protein [Leishmania m... | 52           | 1.00E-04 | 1        | PF12862 | Apc5       | 79.1  | 0.23    | 1.60E-05 | 25    | 33   | 43   |
| 63    | ref XP_002594366.1  hypothetical protein BRAFLDRAFT_277633 [Bran... | 52           | 2.00E-04 | 8        | PF00637 | Clathrin   | 59.6  | 1.3     | 8.90E-05 | 23.1  | 28   | 54   |
| 64    | n.d.                                                                |              |          | 4        | PF13374 | TPR_10     | 27.1  | 9.9     | 0.00067  | 15.3  | 18   | 57   |
| 65    | n.d.                                                                |              |          | 7        | PF12862 | Apc5       | 29.1  | 8.7     | 0.00058  | 19.7  | 15   | 57   |
| 66    | ref XP_005822570.1  hypothetical protein GUITHDRAFT_118293 [Guil... | 55           | 2.00E-05 | 8        | PF13374 | TPR_10     | 27.6  | 9.6     | 0.00065  | 15.2  | 20   | 54   |
| 67    | n.d.                                                                |              |          | 2        | PF12862 | Apc5       | 52.6  | 2.1     | 0.00014  | 22.4  | 28   | 60   |
| 68    | ref XP_003769481.1  PREDICTED: laminin subunit alpha-2 [Sarcophi... | 62           | 2.00E-07 | 1        | PF13374 | TPR_10     | 93.6  | 0.0032  | 2.10E-07 | 27.8  | 32   | 61   |
| 69    | n.d.                                                                |              |          | 4        | PF13174 | TPR_6      | 53.8  | 1.9     | 0.00013  | 17.5  | 17   | 62   |
| 70    | n.d.                                                                |              |          | 1        | PF12862 | Apc5       | 81.8  | 0.16    | 1.10E-05 | 26.3  | 33   | 50   |
| 71    | n.d.                                                                |              |          | 4        | PF13606 | Ank_3      | 26    | 11      | 0.00072  | 15.9  | 17   | 50   |
| 72    | n.d.                                                                |              |          | 3        | PF12862 | Apc5       | 67.8  | 0.72    | 4.90E-05 | 22.4  | 27   | 37   |
| 73    | ref YP_001642797.1  phage minor structural protein [Bacillus wei... | 51           | 3.00E-04 | 1        | PF13374 | TPR_10     | 95.1  | 0.00045 | 3.00E-08 | 29.8  | 34   | 50   |
| 74    | gb EJW88262.1  laminin subunit gamma-1, partial [Wuchereria banc... | 51           | 4.00E-04 | 4        | PF07980 | SusD       | 47.5  | 2.8     | 0.00019  | 23    | 18   | 55   |
| 75    | n.d.                                                                |              |          | 8        | PF08238 | Sei1       | 27.1  | 10      | 0.00067  | 15.3  | 13   | 51   |
| 76    | gb EXX64005.1  Sps1p [Rhizogaphus irregularis DAOM 197198w] 50 8e-0 | 4            |          | n.d.     |         |            |       |         |          |       |      | 55   |
| 77    | ref XP_003872552.1  conserved hypothetical protein [Leishmania m... | 67           | 8.00E-09 | n.d.     |         |            |       |         |          |       |      | 51   |
| 78    | ref XP_003872552.1  conserved hypothetical protein [Leishmania m... | 67           | 8.00E-09 | n.d.     |         |            |       |         |          |       |      | 51   |
| 79    | n.d.                                                                |              |          | 8        | PF12348 | CLASP_N    | 54.7  | 1.8     | 0.00012  | 24.3  | 26   | 56   |
| 80    | ref WP_006717233.1  S6 family IgA-specific metalloendopeptidase/... | 55           | 3.00E-05 | 1        | PF12862 | Apc5       | 73.7  | 0.43    | 2.90E-05 | 25.1  | 31   | 57   |
| 81    | ref XP_006717233.1  S6 family IgA-specific metalloendopeptidase/... | 56           | 2.00E-05 | 1        | PF12862 | Apc5       | 73.9  | 0.42    | 2.80E-05 | 25.2  | 31   | 57   |
| 82    | ref XP_003767551.1  PREDICTED: laminin subunit gamma-1, partial ... | 54           | 8.00E-05 | 2        | PF00515 | TPR_1      | 72.8  | 0.47    | 3.20E-05 | 20.1  | 21   | 58   |
| 83    | ref YP_005168772.1  hypothetical protein DND132_2766 [Desulfobiv... | 50           | 8.00E-04 | 1        | PF00515 | TPR_1      | 73.9  | 0.42    | 2.80E-05 | 20.2  | 21   | 58   |

Best hits from Blast are shown in the left part of the table: n.d. indicates that no hit was found below the E value cutoff of 0.0001. The right side shows the best ranking repeat protein families in Pfam resulting from HHsearch. The final set of proteins validated by crystallography and/or small angle X-ray scattering is highlighted in grey.

#### Supplementary Discussion 4 | Structure determination remarks

Due to the presence of 6 cysteine residues in the native protein, the DHR5 structure was solved by sulfur single wavelength anomalous dispersion (S-SAD) using a dataset collected at 7235 eV. A search for 6 individual sulfur atoms in SHELXD gave many clear solutions that led to near complete autobuilding of a poly-alanine backbone in SHELXE, which was further elaborated using the Autobuild module of Phenix. Ultimately, the final model for DHR5 was in good agreement with the design target structure, despite our initial difficulties in phasing by molecular replacement. While the SAD data set was limited to 1.85 Å, the final model was refined against the original data set (1.25Å). Both data sets were deposited in the Protein Data Bank.

The asymmetric unit for DHR8 was found to contain 4 copies of DHR8. Although the overall structure of the 4 copies is similar, the electron density for the N-terminal helix from two of these monomers is weak, suggesting that these helices are partially disordered in the crystal. Indeed, crystal packing of these helices in the designed conformation would have led to significant steric overlap with one another. As the corresponding helices in the remaining two DHR8 monomers were well-ordered and essentially as designed, these fully ordered models were used for further analysis.

The dataset collected for DHR14 had a large non-origin Patterson peak at fractional coordinates (0.000, 0.217, 0.000), suggesting the presence of translational NCS. However, consideration of the apparent space group, unit cell parameters, and plausible solvent content strongly indicated the presence of a single copy of DHR14 in the asymmetric unit. Given the relatively low pitch of this helical design and the translational pseudosymmetry between the N- and C-terminal halves of the protein, we suspected that intramolecular pseudotranslational NCS might account for the observed Patterson peak. Ultimately, a molecular replacement solution was obtained using 4 of the 8 designed helices of DHR14, and this was sufficient to bootstrap autobuilding of the remaining backbone using SHELXE. In the final model, the helical axis of DHR14 is closely aligned with the crystallographic b axis, and pseudotranslational NCS between the N- and C-terminal repeats with a translation of ~21 Å is in good agreement with the observed fractional Patterson peak at ~0.22 along b.

**Supplementary Table 5 | Summary crystallization**

| Protein | Concentration (mg/ml) | Cryoprotectant added  | Crystallization condition                                                             | Beamline  | Phasing method        | Space group                                   | resolution |
|---------|-----------------------|-----------------------|---------------------------------------------------------------------------------------|-----------|-----------------------|-----------------------------------------------|------------|
| DHR4    | 23                    | 7.5% ethylene glycol  | 0.2 M Ammonium acetate, 0.1M acetate pH 4.6, 30% PEG 4000                             | ALS 8.3.1 | Molecular replacement | P2 <sub>1</sub> 2 <sub>1</sub> 2 <sub>1</sub> | 1.55       |
| DHR5    | 23                    | 17.5% ethylene glycol | 1.0 M Lithium chloride, 0.1 M HEPES pH 7.0, 20% (w/v) PEG 6000                        | ALS 8.3.1 | Molecular replacement | P2 <sub>1</sub> 22 <sub>1</sub>               | 1.25       |
| DHR5    | 23                    | 17.5% ethylene glycol | 20% (w/v) PEG 6000, 1 M Lithium chloride, 0.1 M BisOTris pH 7.0                       | ALS 8.3.1 | Sulfur SAD            | P2 <sub>1</sub> 22 <sub>1</sub>               | 1.85       |
| DHR7    | 19                    | none                  | 0.2 M Sodium chloride, 0.1 M CHES pH 9.5, 50% (v/v) PEG 400                           | ALS 8.3.1 | Molecular replacement | C121                                          | 2.60       |
| DHR8    | 7                     | 7.5% ethylene glycol  | 0.19 M Calcium chloride, 0.095 M HEPES pH 7.5, 26.6% (v/v) PEG 400, 5% (v/v) Glycerol | ALS 8.3.1 | Molecular replacement | P2 <sub>1</sub> 2 <sub>1</sub> 2              | 1.80       |
| DHR10   | 23                    | 17.5% ethylene glycol | 0.2 M Magnesium formate, 20% (w/v) PEG 3350                                           | ALS 8.3.1 | Molecular replacement | P2 <sub>1</sub> 22 <sub>1</sub>               | 1.20       |
| DHR14   | 70                    | 17.5% ethylene glycol | 0.2 M Lithium nitrate, 20% (w/v) PEG 3350                                             | ALS 8.3.1 | Molecular replacement | C222 <sub>1</sub>                             | 1.30       |
| DHR18   | 88                    | none                  | 0.1 M PhosphateOcitrate pH 4.2, 40% (v/v) PEG 300                                     | ALS 8.3.1 | Molecular replacement | P1                                            | 1.75       |
| DHR49   | 31                    | 15% ethylene glycol   | 0.2 M diOPotassium hydrogen phosphate, 20% (w/v) PEG 3350                             | ALS 8.3.1 | Molecular replacement | I4 <sub>1</sub>                               | 1.70       |
| DHR53   | 63                    | 12.5% ethylene glycol | 26% (w/v) PEG 6000, 0.1 M Sodium citrate, pH 2.2                                      | ALS 8.3.1 | Molecular replacement | C12 <sub>1</sub>                              | 1.90       |
| DHR54   | 92                    | none                  | 0.2 M Sodium chloride, 0.1 M Na/K phosphate pH 6.2, 50% (v/v) PEG 200                 | ALS 8.3.1 | Molecular replacement | P2 <sub>1</sub> 2 <sub>1</sub> 2 <sub>1</sub> | 1.50       |
| DHR64   | 43                    | none                  | 0.1 M Sodium acetate pH 4.5, 35% (v/v) MPD                                            | ALS 8.3.1 | Molecular replacement | P2                                            | 2.50       |
| DHR64   | 43                    | 25% ethylene glycol   | 0.1 M Sodium acetate pH 5.0, 10% (v/v) MPD                                            | ALS 8.3.1 | Molecular replacement | P6                                            | 2.90       |
| DHR71   | 147                   | none                  | 0.1 M CHES pH 9.5, 50% (v/v) PEG 200                                                  | ALS 8.3.1 | Molecular replacement | P2 <sub>1</sub> 2 <sub>1</sub> 2 <sub>1</sub> | 1.70       |
| DHR76   | 66                    | 30% ethylene glycol   | 0.1 M MES pH 5.0, 5% (w/v) PEG 6000                                                   | ALS 8.3.1 | Molecular replacement | P2 <sub>1</sub> 2 <sub>1</sub> 2 <sub>1</sub> | 3.35       |
| DHR79   | 22                    | 35% ethylene glycol   | 1.6 M Sodium citrate pH 6.5                                                           | ALS 8.3.1 | Molecular replacement | P4 <sub>3</sub> 2 <sub>1</sub> 2              | 1.90       |
| DHR81   | 39                    | 15% ethylene glycol   | 0.08 M Sodium acetate pH 4.6, 20% (v/v) Glycerol                                      | ALS 8.2.1 | Molecular replacement | I23                                           | 2.05       |

**Supplementary Table 6. Data collection and refinement statistics for DHR4 and DHR5**

| Data collection                                                          | DHR4                                                                       | DHR5                                                                    |
|--------------------------------------------------------------------------|----------------------------------------------------------------------------|-------------------------------------------------------------------------|
| Beamline                                                                 | ALS 8.3.1                                                                  | ALS 8.3.1                                                               |
| Wavelength (Å)                                                           | 1.12                                                                       | 1.12                                                                    |
| Space group                                                              | P2 <sub>1</sub> 2 <sub>1</sub> 2 <sub>1</sub>                              | P2 <sub>1</sub> 22 <sub>1</sub>                                         |
| Unit cell parameters (Å, °)                                              | a = 43.8, b = 56.2, c =66.4<br>Å<br>$\alpha = \beta = \gamma = 90.0^\circ$ | a = 47.3, b = 51.1, c =72.9 Å<br>$\alpha = \beta = \gamma = 90.0^\circ$ |
| Resolution (Å)                                                           | 50 - 1.55 (1.59-1.55) <sup>a</sup>                                         | 50 - 1.25 (1.28-1.25) <sup>a</sup>                                      |
| Observations                                                             | 172,015                                                                    | 334,858                                                                 |
| Unique Reflections                                                       | 24,187 (1,729) <sup>a</sup>                                                | 47,733 (2,877) <sup>a</sup>                                             |
| Redundancy                                                               | 7.1 (7.2) <sup>a</sup>                                                     | 7.0 (5.7) <sup>a</sup>                                                  |
| Completeness (%)                                                         | 98.7 (97.6) <sup>a</sup>                                                   | 96.0 (79.6) <sup>a</sup>                                                |
| $\langle I/\sigma_I \rangle$                                             | 16.6 (1.0) <sup>a</sup>                                                    | 18.2 (1.2) <sup>a</sup>                                                 |
| CC1/2                                                                    | 0.99 (0.42)                                                                | 1.00 (0.65)                                                             |
| R <sub>sym</sub> <sup>b</sup>                                            | 0.07 (1.98) <sup>a</sup>                                                   | 0.05 (1.53) <sup>a</sup>                                                |
| Refinement statistics                                                    |                                                                            |                                                                         |
| Resolution (Å)                                                           | 50 – 1.55                                                                  | 50 – 1.25                                                               |
| Reflections (work)                                                       | 22,937                                                                     | 44,703                                                                  |
| Reflections (test)                                                       | 1,207                                                                      | 1,758                                                                   |
| R <sub>cryst</sub> (%) <sup>c</sup> / R <sub>free</sub> (%) <sup>d</sup> | 19.1 / 22.0                                                                | 17.5 / 19.4                                                             |
| Average B (Å <sup>2</sup> )                                              | 35.1                                                                       | 26.6                                                                    |
| Wilson B (Å <sup>2</sup> )                                               | 22.5                                                                       | 13.8                                                                    |
| Protein atoms                                                            | 3,667                                                                      | 3725                                                                    |
| Waters                                                                   | 91                                                                         | 191                                                                     |
| Other                                                                    | 0                                                                          | 0                                                                       |
| RMSD from ideal geometry                                                 |                                                                            |                                                                         |
| Bond length (Å)                                                          | 0.005                                                                      | 0.005                                                                   |
| Bond angles (°)                                                          | 0.77                                                                       | 0.84                                                                    |
| Ramachandran statistics (%) <sup>c</sup>                                 |                                                                            |                                                                         |
| Favored                                                                  | 99.1                                                                       | 99.5                                                                    |
| Outliers                                                                 | 0.0                                                                        | 0.0                                                                     |
| PDB Code                                                                 | 5CW B                                                                      | 5CW C                                                                   |

**Supplementary Table 7. Data collection and refinement statistics for DHR7 and DHR8**

| Data collection                                                          | DHR7                                                                            | DHR8                                                                     |
|--------------------------------------------------------------------------|---------------------------------------------------------------------------------|--------------------------------------------------------------------------|
| Beamline                                                                 | ALS 8.3.1                                                                       | ALS 8.3.1                                                                |
| Wavelength (Å)                                                           | 1.12                                                                            | 1.12                                                                     |
| Space group                                                              | C2                                                                              | P2 <sub>1</sub> 2 <sub>1</sub> 2                                         |
| Unit cell parameters (Å, °)                                              | a = 84.7, b = 29.3, c = 63.2 Å<br>$\alpha = \gamma = 90.0^\circ, \beta = 123.5$ | a = 75.7, b = 76.4, c = 33.1 Å<br>$\alpha = \beta = \gamma = 90.0^\circ$ |
| Resolution (Å)                                                           | 50 - 2.60 (2.67-2.60) <sup>a</sup>                                              | 50 - 1.80 (1.85-1.80) <sup>a</sup>                                       |
| Observations                                                             | 13,960                                                                          | 512,567                                                                  |
| Unique Reflections                                                       | 4,124 (322) <sup>a</sup>                                                        | 72,203 (5,260) <sup>a</sup>                                              |
| Redundancy                                                               | 3.4 (3.4) <sup>a</sup>                                                          | 7.1 (7.2) <sup>a</sup>                                                   |
| Completeness (%)                                                         | 98.3 (97.9) <sup>a</sup>                                                        | 99.9 (100.0) <sup>a</sup>                                                |
| $\langle I/\sigma_I \rangle$                                             | 4.9 (1.2) <sup>a</sup>                                                          | 12.1 (1.1) <sup>a</sup>                                                  |
| CC1/2                                                                    | 0.99 (0.63)                                                                     | 1.00 (0.48)                                                              |
| R <sub>sym</sub> <sup>b</sup>                                            | 0.15 (0.81) <sup>a</sup>                                                        | 0.09 (1.85) <sup>a</sup>                                                 |
| Refinement statistics                                                    |                                                                                 |                                                                          |
| Resolution (Å)                                                           | 50 - 2.60                                                                       | 50 - 1.80                                                                |
| Reflections (work)                                                       | 3,916                                                                           | 68,562                                                                   |
| Reflections (test)                                                       | 206                                                                             | 3,591                                                                    |
| R <sub>cryst</sub> (%) <sup>c</sup> / R <sub>free</sub> (%) <sup>d</sup> | 25.3 / 30.9                                                                     | 20.5 / 22.8                                                              |
| Average B (Å <sup>2</sup> )                                              | 66.5                                                                            | 44.8                                                                     |
| Wilson B (Å <sup>2</sup> )                                               | 55.6                                                                            | 27.7                                                                     |
| Protein atoms                                                            | 2,521                                                                           | 11,104                                                                   |
| Waters                                                                   | 0                                                                               | 466                                                                      |
| Other                                                                    | 0                                                                               | 31                                                                       |
| 1GRMSD from ideal geometry                                               |                                                                                 |                                                                          |
| Bond length (Å)                                                          | 0.004                                                                           | 0.005                                                                    |
| Bond angles (°)                                                          | 0.58                                                                            | 0.73                                                                     |
| Ramachandran statistics (%) <sup>e</sup>                                 |                                                                                 |                                                                          |
| Favored                                                                  | 99.4                                                                            | 99.3                                                                     |
| Outliers                                                                 | 0.0                                                                             | 0.0                                                                      |
| PDB Code                                                                 | 5CWD                                                                            | 5CWF                                                                     |



**Supplementary Table 8. Data collection and refinement statistics for DHR10 and DHR14**

| Data collection                                                        | DHR10                                                                    | DHR14                                                                     |
|------------------------------------------------------------------------|--------------------------------------------------------------------------|---------------------------------------------------------------------------|
| Beamline                                                               | ALS 8.3.1                                                                | ALS 8.3.1                                                                 |
| Wavelength (Å)                                                         | 1.12                                                                     | 1.12                                                                      |
| Space group                                                            | P2 <sub>1</sub> 22 <sub>1</sub>                                          | C222 <sub>1</sub>                                                         |
| Unit cell parameters (Å, °)                                            | a = 47.6, b = 50.6, c = 72.4 Å<br>$\alpha = \beta = \gamma = 90.0^\circ$ | a = 41.0, b = 104.4, c = 90.2 Å<br>$\alpha = \beta = \gamma = 90.0^\circ$ |
| Resolution (Å)                                                         | 50 - 1.20 (1.23-1.20) <sup>a</sup>                                       | 50 - 1.30 (1.33-1.30) <sup>a</sup>                                        |
| Observations                                                           | 313,175                                                                  | 964,864                                                                   |
| Unique Reflections                                                     | 54,627 (3,516) <sup>a</sup>                                              | 47,853 (3,495) <sup>a</sup>                                               |
| Redundancy                                                             | 5.6 (2.8) <sup>a</sup>                                                   | 20.2 (17.0) <sup>a</sup>                                                  |
| Completeness (%)                                                       | 98.5 (87.4) <sup>a</sup>                                                 | 99.7 (99.8) <sup>a</sup>                                                  |
| $\langle I/\sigma_I \rangle$                                           | 22.7 (1.9) <sup>a</sup>                                                  | 19.2 (1.5) <sup>a</sup>                                                   |
| CC1/2                                                                  | 1.00 (0.81)                                                              | 1.00 (0.85)                                                               |
| R <sub>sym</sub> <sup>b</sup>                                          | 0.04 (0.53) <sup>a</sup>                                                 | 0.08 (2.51) <sup>a</sup>                                                  |
| Refinement statistics                                                  |                                                                          |                                                                           |
| Resolution (Å)                                                         | 50 – 1.20                                                                | 50 – 1.30                                                                 |
| Reflections (work)                                                     | 51,813                                                                   | 45,170                                                                    |
| Reflections (test)                                                     | 2,730                                                                    | 2,377                                                                     |
| R <sub>cry</sub> (%) <sup>c</sup> / R <sub>free</sub> (%) <sup>d</sup> | 14.1 / 16.9                                                              | 16.2 / 18.6                                                               |
| Average B (Å <sup>2</sup> )                                            | 21.3                                                                     | 30.1                                                                      |
| Wilson B (Å <sup>2</sup> )                                             | 12.0                                                                     | 15.2                                                                      |
| Protein atoms                                                          | 3,839                                                                    | 2,860                                                                     |
| Waters                                                                 | 238                                                                      | 240                                                                       |
| Other                                                                  | 10                                                                       | 20                                                                        |
| 1GRMSD from ideal geometry                                             |                                                                          |                                                                           |
| Bond length (Å)                                                        | 0.007                                                                    | 0.018                                                                     |
| Bond angles (°)                                                        | 1.07                                                                     | 1.52                                                                      |
| Ramachandran statistics (%) <sup>e</sup>                               |                                                                          |                                                                           |
| Favored                                                                | 99.6                                                                     | 100.0                                                                     |
| Outliers                                                               | 0.0                                                                      | 0.0                                                                       |
| PDB Code                                                               | 5CWG                                                                     | 5CWH                                                                      |

**Supplementary Table 9. Data collection and refinement statistics for DHR18 and DHR49**

| Data collection                                  | DHR18                                                                          | DHR49                                                                        |
|--------------------------------------------------|--------------------------------------------------------------------------------|------------------------------------------------------------------------------|
| Beamline                                         | ALS 8.3.1                                                                      | ALS 8.3.1                                                                    |
| Wavelength (Å)                                   | 1.12                                                                           | 1.12                                                                         |
| Space group                                      | P1                                                                             | P1                                                                           |
| Unit cell parameters (Å, °)                      | a = 24.9, b = 43.7, c = 48.8<br>$\alpha = 116.6, \beta = 90.7, \gamma = 102.2$ | a = 46.7, b = 61.7, c = 61.7<br>$\alpha = 81.9, \beta = 67.8, \gamma = 67.9$ |
| Resolution (Å)                                   | 50 – 1.75 (1.80-1.75) <sup>a</sup>                                             | 50 - 1.80 (1.85-1.80) <sup>a</sup>                                           |
| Observations                                     | 36,231                                                                         | 103,465                                                                      |
| Unique Reflections                               | 17,261 (1,247) <sup>a</sup>                                                    | 52,418 (3,824) <sup>a</sup>                                                  |
| Redundancy                                       | 2.1 (2.1) <sup>a</sup>                                                         | 2.0 (2.0) <sup>a</sup>                                                       |
| Completeness (%)                                 | 94.8 (94.3) <sup>a</sup>                                                       | 95.6 (94.5) <sup>a</sup>                                                     |
| $\langle I/\sigma_I \rangle$                     | 9.8 (1.1) <sup>a</sup>                                                         | 9.9 (1.4) <sup>a</sup>                                                       |
| CC1/2                                            | 1.00 (0.54)                                                                    | 1.00 (0.57)                                                                  |
| $R_{\text{sym}}^b$                               | 0.05 (0.85) <sup>a</sup>                                                       | 0.04 (0.59) <sup>a</sup>                                                     |
| Refinement statistics                            |                                                                                |                                                                              |
| Resolution (Å)                                   | 50 – 1.75                                                                      | 50 – 1.80                                                                    |
| Reflections (work)                               | 16,378                                                                         | 47,180                                                                       |
| Reflections (test)                               | 866                                                                            | 1,864                                                                        |
| $R_{\text{cryst}}(\%)^c / R_{\text{free}}(\%)^d$ | 18.5 / 22.2                                                                    | 24.0 / 28.8                                                                  |
| Average B (Å <sup>2</sup> )                      | 41.2                                                                           | 49.4                                                                         |
| Wilson B (Å <sup>2</sup> )                       | 23.9                                                                           | 28.9                                                                         |
| Protein atoms                                    | 3,757                                                                          | 10,044                                                                       |
| Waters                                           | 69                                                                             | 370                                                                          |
| Other                                            | 5                                                                              | 0                                                                            |
| 1GRMSD from ideal geometry                       |                                                                                |                                                                              |
| Bond length (Å)                                  | 0.010                                                                          | 0.005                                                                        |
| Bond angles (°)                                  | 1.01                                                                           | 0.72                                                                         |
| Ramachandran statistics (%) <sup>c</sup>         |                                                                                |                                                                              |
| Favored                                          | 99.2                                                                           | 98.7                                                                         |
| Outliers                                         | 0.4                                                                            | 0.0                                                                          |
| PDB Code                                         | 5CWI                                                                           | 5CWJ                                                                         |

**Supplementary Table 10. Data collection and refinement statistics for DHR53 and DHR54**

| Data collection                                                          | DHR53                                                                    | DHR54                                                            |
|--------------------------------------------------------------------------|--------------------------------------------------------------------------|------------------------------------------------------------------|
| Beamline                                                                 | ALS 8.3.1                                                                | ALS 8.3.1                                                        |
| Wavelength (Å)                                                           | 1.12                                                                     | 1.12                                                             |
| Space group                                                              | C2                                                                       | P2 <sub>1</sub> 2 <sub>1</sub> 2 <sub>1</sub>                    |
| Unit cell parameters (Å, °)                                              | a = 127.4, b = 24.4, c = 60.5<br>$\alpha = \gamma = 90.0, \beta = 116.9$ | a = 55.3, b = 69.1, c = 82.6<br>$\alpha = \beta = \gamma = 90.0$ |
| Resolution (Å)                                                           | 50 – 1.90 (1.95-1.90) <sup>a</sup>                                       | 50 - 1.50 (1.54-1.50) <sup>a</sup>                               |
| Observations                                                             | 46,741                                                                   | 360,741                                                          |
| Unique Reflections                                                       | 13,327 (949) <sup>a</sup>                                                | 51,178 (3,720) <sup>a</sup>                                      |
| Redundancy                                                               | 3.5 (3.6) <sup>a</sup>                                                   | 7.0 (7.1) <sup>a</sup>                                           |
| Completeness (%)                                                         | 98.3 (99.2) <sup>a</sup>                                                 | 99.6 (99.9) <sup>a</sup>                                         |
| $\langle I/\sigma_I \rangle$                                             | 13.2 (1.0) <sup>a</sup>                                                  | 15.1 (1.0) <sup>a</sup>                                          |
| CC1/2                                                                    | 1.00 (0.74)                                                              | 1.00 (0.49)                                                      |
| R <sub>sym</sub> <sup>b</sup>                                            | 0.05 (1.67) <sup>a</sup>                                                 | 0.06 (1.80) <sup>a</sup>                                         |
| Refinement statistics                                                    |                                                                          |                                                                  |
| Resolution (Å)                                                           | 50 – 1.90                                                                | 50 – 1.50                                                        |
| Reflections (work)                                                       | 12,581                                                                   | 45,069                                                           |
| Reflections (test)                                                       | 663                                                                      | 1,817                                                            |
| R <sub>cryst</sub> (%) <sup>c</sup> / R <sub>free</sub> (%) <sup>d</sup> | 24.5 / 28.5                                                              | 18.3 / 22.2                                                      |
| Average B (Å <sup>2</sup> )                                              | 83.9                                                                     | 43.1                                                             |
| Wilson B (Å <sup>2</sup> )                                               | 38.0                                                                     | 23.2                                                             |
| Protein atoms                                                            | 2,755                                                                    | 5,515                                                            |
| Waters                                                                   | 46                                                                       | 168                                                              |
| Other                                                                    | 0                                                                        | 0                                                                |
| 1GRMSD from ideal geometry                                               |                                                                          |                                                                  |
| Bond length (Å)                                                          | 0.006                                                                    | 0.011                                                            |
| Bond angles (°)                                                          | 0.81                                                                     | 1.25                                                             |
| Ramachandran statistics (%) <sup>e</sup>                                 |                                                                          |                                                                  |
| Favored                                                                  | 97.7                                                                     | 98.9                                                             |
| Outliers                                                                 | 0.6                                                                      | 0.3                                                              |
| PDB Code                                                                 | 5CWK                                                                     | 5CWL                                                             |

**Supplementary Table 11. Data collection and refinement statistics for DHR64 and DHR71**

| Data collection                                                          | DHR64                                                             | DHR71                                                             |
|--------------------------------------------------------------------------|-------------------------------------------------------------------|-------------------------------------------------------------------|
| Beamline                                                                 | ALS 8.3.1                                                         | ALS 8.3.1                                                         |
| Wavelength (Å)                                                           | 1.12                                                              | 1.12                                                              |
| Space group                                                              | P6 <sub>5</sub>                                                   | P2 <sub>1</sub> 2 <sub>1</sub> 2 <sub>1</sub>                     |
| Unit cell parameters (Å, °)                                              | a = b = 98.3, c = 48.6<br>$\alpha = \beta = 90.0, \gamma = 120.0$ | a = 23.3, b = 82.9, c = 103.3<br>$\alpha = \beta = \gamma = 90.0$ |
| Resolution (Å)                                                           | 50 - 2.90 (2.98-2.90) <sup>a</sup>                                | 50 - 1.70 (1.74-1.70) <sup>a</sup>                                |
| Observations                                                             | 67,571                                                            | 158,634                                                           |
| Unique Reflections                                                       | 6,086 (448) <sup>a</sup>                                          | 22,958 (1,666) <sup>a</sup>                                       |
| Redundancy                                                               | 11.1 (11.3) <sup>a</sup>                                          | 6.9 (7.1) <sup>a</sup>                                            |
| Completeness (%)                                                         | 100.0 (100.0) <sup>a</sup>                                        | 99.6 (100.0) <sup>a</sup>                                         |
| $\langle I/\sigma_I \rangle$                                             | 14.4 (1.3) <sup>a</sup>                                           | 15.0 (1.3) <sup>a</sup>                                           |
| CC1/2                                                                    | 1.00 (0.44)                                                       | 1.00 (0.64)                                                       |
| R <sub>sym</sub> <sup>b</sup>                                            | 0.15 (2.14) <sup>a</sup>                                          | 0.08 (1.64) <sup>a</sup>                                          |
| Refinement statistics                                                    |                                                                   |                                                                   |
| Resolution (Å)                                                           | 50 – 2.90                                                         | 50 – 1.70                                                         |
| Reflections (work)                                                       | 5,268                                                             | 21,747                                                            |
| Reflections (test)                                                       | 277                                                               | 1,144                                                             |
| R <sub>cryst</sub> (%) <sup>c</sup> / R <sub>free</sub> (%) <sup>d</sup> | 21.4 / 26.5                                                       | 20.6 / 25.0                                                       |
| Average B (Å <sup>2</sup> )                                              | 104.9                                                             | 36.1                                                              |
| Wilson B (Å <sup>2</sup> )                                               | 72.9                                                              | 24.4                                                              |
| Protein atoms                                                            | 3,656                                                             | 3,257                                                             |
| Waters                                                                   | 29                                                                | 95                                                                |
| Other                                                                    | 0                                                                 | 0                                                                 |
| 1GRMSD from ideal geometry                                               |                                                                   |                                                                   |
| Bond length (Å)                                                          | 0.019                                                             | 0.010                                                             |
| Bond angles (°)                                                          | 1.70                                                              | 1.14                                                              |
| Ramachandran statistics (%) <sup>e</sup>                                 |                                                                   |                                                                   |
| Favored                                                                  | 93.3                                                              | 99.0                                                              |
| Outliers                                                                 | 0.9                                                               | 0.0                                                               |
| PDB Code                                                                 | 5CWM                                                              | 5CWN                                                              |

**Supplementary Table 12. Data collection and refinement statistics for DHR76 and DHR79**

| Data collection                                                          | DHR76                                                                   | DHR79                                                              |
|--------------------------------------------------------------------------|-------------------------------------------------------------------------|--------------------------------------------------------------------|
| Beamline                                                                 | ALS 8.3.1                                                               | ALS 8.3.1                                                          |
| Wavelength (Å)                                                           | 1.12                                                                    | 1.12                                                               |
| Space group                                                              | P2 <sub>1</sub> 2 <sub>1</sub> 2 <sub>1</sub>                           | P4 <sub>3</sub> 2 <sub>1</sub> 2                                   |
| Unit cell parameters (Å, °)                                              | a = 62.5, b = 66.3, c = 102.2<br>$\alpha = \beta = \gamma = 90.0^\circ$ | a = b = 94.3, c = 77.6 Å<br>$\alpha = \beta = \gamma = 90.0^\circ$ |
| Resolution (Å)                                                           | 50 – 3.55 (3.44-3.55) <sup>a</sup>                                      | 50 - 1.90 (1.95-1.90) <sup>a</sup>                                 |
| Observations                                                             | 45,810                                                                  | 398,338                                                            |
| Unique Reflections                                                       | 6,514 (470) <sup>a</sup>                                                | 28,192 (2,042) <sup>a</sup>                                        |
| Redundancy                                                               | 7.0 (7.2) <sup>a</sup>                                                  | 14.1 (14.4) <sup>a</sup>                                           |
| Completeness (%)                                                         | 99.8 (100.0) <sup>a</sup>                                               | 100.0 (100.0) <sup>a</sup>                                         |
| $\langle I/\sigma_I \rangle$                                             | 10.9 (1.2) <sup>a</sup>                                                 | 17.5 (1.1) <sup>a</sup>                                            |
| CC1/2                                                                    | 1.00 (0.33)                                                             | 1.00 (0.48)                                                        |
| R <sub>sym</sub> <sup>b</sup>                                            | 0.18 (1.91) <sup>a</sup>                                                | 0.11 (3.61) <sup>a</sup>                                           |
| Refinement statistics                                                    |                                                                         |                                                                    |
| Resolution (Å)                                                           | 50 – 3.55                                                               | 50 – 1.90                                                          |
| Reflections (work)                                                       | 6,162                                                                   | 26,730                                                             |
| Reflections (test)                                                       | 322                                                                     | 1,406                                                              |
| R <sub>cryst</sub> (%) <sup>c</sup> / R <sub>free</sub> (%) <sup>d</sup> | 37.2 / 40.8                                                             | 19.3 / 23.8                                                        |
| Average B (Å <sup>2</sup> )                                              | 242.9                                                                   | 58.6                                                               |
| Wilson B (Å <sup>2</sup> )                                               | 111.5                                                                   | 34.2                                                               |
| Protein atoms                                                            | 6,992                                                                   | 3,591                                                              |
| Waters                                                                   | 0                                                                       | 63                                                                 |
| Other                                                                    | 0                                                                       | 0                                                                  |
| 1GRMSD from ideal geometry                                               |                                                                         |                                                                    |
| Bond length (Å)                                                          | 0.004                                                                   | 0.013                                                              |
| Bond angles (°)                                                          | 0.83                                                                    | 1.29                                                               |
| Ramachandran statistics (%) <sup>e</sup>                                 |                                                                         |                                                                    |
| Favored                                                                  | 98.6                                                                    | 98.3                                                               |
| Outliers                                                                 | 0.0                                                                     | 0.4                                                                |
| PDB Code                                                                 | 5CWO                                                                    | 5CWP                                                               |

**Supplementary Table 13. Data collection and refinement statistics for DHR81**

|                                                  |                                                       |
|--------------------------------------------------|-------------------------------------------------------|
| Data collection                                  | DHR81                                                 |
| Beamline                                         | ALS 8.2.1                                             |
| Wavelength (Å)                                   | 1.00                                                  |
| Space group                                      | I23                                                   |
| Unit cell parameters (Å, °)                      | a = b = c = 120.0<br>$\alpha = \beta = \gamma = 90.0$ |
| Resolution (Å)                                   | 50 - 2.05 (2.10-2.05) <sup>a</sup>                    |
| Observations                                     | 397,887                                               |
| Unique Reflections                               | 18,193 (1,317) <sup>a</sup>                           |
| Redundancy                                       | 21.9 (22.4) <sup>a</sup>                              |
| Completeness (%)                                 | 100.0 (100.0) <sup>a</sup>                            |
| $\langle I/\sigma_I \rangle$                     | 16.8 (1.1) <sup>a</sup>                               |
| CC1/2                                            | 1.00 (0.32)                                           |
| $R_{\text{sym}}^b$                               | 0.31 (3.53) <sup>a</sup>                              |
| Refinement statistics                            |                                                       |
| Resolution (Å)                                   | 50 – 2.05                                             |
| Reflections (work)                               | 16,326                                                |
| Reflections (test)                               | 860                                                   |
| $R_{\text{cryst}}(\%)^c / R_{\text{free}}(\%)^d$ | 21.7 / 26.6                                           |
| Average B (Å <sup>2</sup> )                      | 49.3                                                  |
| Wilson B (Å <sup>2</sup> )                       | 31.4                                                  |
| Protein atoms                                    | 3,654                                                 |
| Waters                                           | 51                                                    |
| Other                                            | 14                                                    |
| 1GRMSD from ideal geometry                       |                                                       |
| Bond length (Å)                                  | 0.007                                                 |
| Bond angles (°)                                  | 0.85                                                  |
| Ramachandran statistics (%) <sup>e</sup>         |                                                       |
| Favored                                          | 98.3                                                  |
| Outliers                                         | 0.4                                                   |
| PDB Code                                         | 5CWQ                                                  |

**Supplementary Table 14. Data collection and phasing statistics for DHR5 (S-SAD)**

| Data collection               |                                                                  |
|-------------------------------|------------------------------------------------------------------|
| Beamline                      | ALS 8.3.1                                                        |
| Space group                   | P2 <sub>1</sub> 22 <sub>1</sub>                                  |
| Unit cell parameters (Å, °)   | a = 47.3, b = 50.7, c = 73.0<br>$\alpha = \beta = \gamma = 90.0$ |
| Wavelength (Å)                | 1.714                                                            |
| Resolution (Å)                | 50 – 1.85 (1.90-1.85) <sup>a</sup>                               |
| Observations                  | 556,066                                                          |
| Unique Reflections            | 28,741 (1,966) <sup>a</sup>                                      |
| Redundancy                    | 19.3 (7.2) <sup>a</sup>                                          |
| Completeness (%)              | 99.2 (91.0) <sup>a</sup>                                         |
| $\langle I/\sigma_I \rangle$  | 31.9 (3.2) <sup>a</sup>                                          |
| CC1/2                         | 1.00 (0.92)                                                      |
| R <sub>sym</sub> <sup>b</sup> | 0.08 (0.50) <sup>a</sup>                                         |
| FOM                           | 0.58                                                             |
| PDB Code                      | 5CWC                                                             |

**Supplementary Tables 6-14 | Crystallography data collection**

<sup>a</sup> Numbers in parentheses refer to the highest resolution shell.

<sup>b</sup>  $R_{\text{sym}} = \sum_{hkl} \sum_i |I_{hkl,i} - \langle I_{hkl} \rangle| / \sum_{hkl} \sum_i I_{hkl,i}$ , where  $I_{hkl,i}$  is the scaled intensity of the  $i^{\text{th}}$  measurement of reflection h, k, l,  $\langle I_{hkl} \rangle$  is the average intensity for that reflection, and  $n$  is the redundancy<sup>24</sup>.

<sup>c</sup>  $R_{\text{cryst}} = \sum_{hkl} |F_o - F_c| / \sum_{hkl} |F_o| \times 100$

<sup>d</sup>  $R_{\text{free}}$  was calculated as for  $R_{\text{cryst}}$ , but on a test set comprising 5% of the data excluded from refinement.

<sup>e</sup> Calculated using Molprobit<sup>25</sup>.

## Supplementary Discussion 5 | Small Angle X-ray Scattering (SAXS) analysis

Guinier and  $P(r)$  analysis were done using using ATSAS<sup>26</sup>. The Porod exponent was determined from a linear regression analysis ( $I$  vs  $q$ ) of the top of the first peak in the Porod-Debye plot ( $q^4 \cdot I(q)$  vs  $q^4$ ) of the scattering data, implemented in SCATTER, available at beamline 12.3.1<sup>27,28</sup>. The molecular mass in solution was calculated using SCATTER<sup>29</sup>. The results are summarized in Supplementary Table 15.

25% of the designs had molecular weights in solution that were significantly greater than the predicted molecular weight (1.2-4 fold), suggesting that these designs formed multimeric assemblies or a small portion of aggregates<sup>29</sup>. All 55 designs had Porod exponents ( $P_E$ ) greater than 2.9, indicating significant levels of folded protein; 67% of the designs had a  $P_E$  of 3.4-4, indicating a well-folded core<sup>28</sup>. Of the 15 proteins that crystallized, the majority (66%) had  $P_E$  of 3.9-4, consistent with more well-packed proteins being easier to crystallize.

Radius of gyration ( $R_g$ ) and maximum of distance distribution ( $d_{max}$ ) were calculated from real space distance distribution  $P(r)$ . Distance distribution comparisons between experimental data and models are included in supporting\_experimental\_data.pdf. Among the models confirmed by crystallography, DHR 49 and 76 formed dimers in solution. The experimental data were fit using models based on the dimer configuration observed in the crystal structure. DHR 5 tendency to aggregation (see SEC in supporting\_experimental\_data.pdf) affected the SAXS profile resulting in a high Molecular weight and  $V_r$  above our acceptance threshold.

If molecular mass and  $R_g$  of models were within a 25% error from experimental data and  $V_r$  was below 2.5, the models were considered able to recapture the SAXS data.  $d_{max}$  errors are generally within 25%; higher values are highlighted in Supplementary Table 15.

43 designs satisfied our requirements: DHR 1 2 3 4 7 8 9 10 14 15 18 20 21 23 24 26 27 31 32 36 39 46 47 49 52 53 54 55 57 58 59 62 64 68 70 71 72 76 77 78 79 80 81 82. The corresponding models, including also DHR5, are shown in Extended Data Fig. 9.



Supplementary Table 15 | Summary of SAXS analysis

|     |                | MW       |      | Porod | q range       |          | Guinier  |             |           |       | gnom p(r) |      |       | Model p(r) |      | Model Fit |              | Crystal p(r) |      | Crystal Fit |              | accepted |      |
|-----|----------------|----------|------|-------|---------------|----------|----------|-------------|-----------|-------|-----------|------|-------|------------|------|-----------|--------------|--------------|------|-------------|--------------|----------|------|
| DHR | protein length | expected | SAXS |       | diff w/in 25% | q min    | q end    | start range | end range | Rg    | l0        | dmax | Rg    | l0         | dmax | Rg        | 0.015<q<0.25 | chi          | dmax | Rg          | 0.015<q<0.25 |          | chi  |
| 1   | 187            | 19.983   | 23.5 | YES   | 4             | 0.02767  | 0.324398 | 0.02767     | 0.059292  | 23    | 1078      | 90   | 24.46 | 1098       | 65   | 19.45     | 2.02         | 6.62         |      |             |              |          | yes* |
| 3   | 179            | 19.949   | 21.8 | YES   | 4             | 0.032535 | 0.325006 | 0.032535    | 0.05686   | 22.8  | 441       | 80   | 23.2  | 438        | 65   | 18.91     | 1.53         | 4.13         |      |             |              |          | yes  |
| 4   | 211            | 23.8     | 21.8 | YES   | 4             | 0.038616 | 0.322574 | 0.038616    | 0.074495  | 18.5  | 686.32    | 55   | 18.44 | 689        | 55   | 18.69     | 1.76         | 2.44         | 54   | 18.5        | 1.46         | 2.21     | yes  |
| 5   | 210            | 23.714   | 73.5 | NO    | 3.5           | 0.013075 | 0.328046 |             |           |       |           |      |       |            |      |           |              |              |      |             |              |          | no   |
| 6   | 178            | 19.983   | 31.8 | NO    | 3.7           | 0.013075 | 0.328019 |             |           |       |           |      |       |            |      |           |              |              |      |             |              |          | no   |
| 7   | 179            | 19.066   | 16.6 | YES   | 3.7           | 0.034359 | 0.325006 | 0.034359    | 0.070847  | 19.2  | 209.98    | 70   | 19.8  | 211        | 60   | 18.72     | 1.04         | 1.73         | 65   | 18.63       | 1.23         | 1.93     | yes  |
| 8   | 191            | 21.339   | 21.3 | YES   | 4             | 0.027059 | 0.326803 | 0.027059    | 0.063539  | 21.6  | 511.1     | 75   | 22.1  | 513        | 72   | 20.82     | 2.29         | 1.58         | 70   | 21.4        | 1.76         | 0.99     | yes  |
| 9   | 211            | 23.734   | 22.8 | YES   | 4             | 0.024021 | 0.322546 | 0.024021    | 0.05017   | 18.2  | 538.67    | 55   | 18.5  | 546        | 52   | 18.32     | 2.01         | 1.51         |      |             |              |          | yes  |
| 10  | 210            | 23.605   | 26.5 | YES   | 4             | 0.022805 | 0.322574 | 0.022805    | 0.05017   | 24.3  | 600.99    | 62   | 20.37 | 603        | 62   | 20.37     | 1.77         | 5.00         | 76   | 22.57       | 1.51         | 2.67     | yes  |
| 11  | 187            | 20.63    | 78.7 | NO    | 3.4           | 0.013075 | 0.328046 |             |           |       |           |      |       |            |      |           |              |              |      |             |              |          | no   |
| 13  | 156            | 17.017   | 16.6 | YES   | 3.8           | 0.028278 | 0.320143 | 0.028278    | 0.05686   | 24    | 81.84     | 120  | 29.28 | 89.3       | 52   | 17.83     | 5.03         | 4.69         |      |             |              |          | no   |
| 21  | 164            | 18.765   | 20.4 | YES   | 3.9           | 0.020298 | 0.325614 | 0.020298    | 0.06599   | 20.6  | 2098.3    | 80   | 21.4  | 209        | 68   | 19.96     | 0.74         | 2.26         | 58   | 19.04       | 0.75         | 1.42     | yes  |
| 15  | 196            | 22.58    | 22.9 | YES   | 4             | 0.020372 | 0.319535 | 0.020372    | 0.070238  | 19.4  | 199.2     | 65   | 19.45 | 200        | 63   | 19.42     | 1.28         | 1.69         |      |             |              |          | yes  |
| 16  | 188            | 21.495   | 39.6 | NO    | 3.9           | 0.02767  | 0.323182 |             |           |       |           |      |       |            |      |           |              |              |      |             |              |          | no   |
| 17  | 228            | 25.733   | 30   | YES   | 3.1           | 0.024021 | 0.320751 | 0.024021    | 0.0374    | 35.2  | 78.164    | 150  | 41.52 | 83.1       | 69   | 21.09     | 4.11         | 4.93         |      |             |              |          | no   |
| 18  | 250            | 26.993   | 22.3 | YES   | 2.9           | 0.012467 | 0.321967 | 0.012467    | 0.039224  | 25    | 1236.1    | 80   | 23.1  | 1187       | 76   | 20.67     | 0.88         | 6.81         | 81   | 21.5        | 0.82         | 4.91     | yes  |
| 19  | 163            | 18.64    | 25.8 | NO    | 3.9           | 0.024629 | 0.323182 |             |           |       |           |      |       |            |      |           |              |              |      |             |              |          | no   |
| 20  | 163            | 18.284   | 17.6 | YES   | 4             | 0.020372 | 0.320751 | 0.020372    | 0.071455  | 17.7  | 287.32    | 50   | 17.73 | 289        | 51   | 17.75     | 1.18         | 3.06         |      |             |              |          | yes  |
| 23  | 174            | 19.966   | 21.4 | YES   | 3.9           | 0.016724 | 0.321967 | 0.016724    | 0.071455  | 19    | 244.21    | 56   | 19.2  | 245        | 65   | 19.59     | 0.99         | 2.12         |      |             |              |          | yes  |
| 24  | 171            | 19.974   | 21.4 | YES   | 4             | 0.024627 | 0.326195 | 0.024627    | 0.061107  | 22    | 1625      | 92   | 23.77 | 1667       | 80   | 20.98     | 1.66         | 3.83         |      |             |              |          | yes  |
| 23  | 195            | 22.344   | 24.5 | YES   | 4             | 0.016115 | 0.321359 | 0.016115    | 0.056252  | 22    | 396.79    | 80   | 22.6  | 399        | 70   | 21.52     | 0.93         | 3.70         |      |             |              |          | yes  |
| 25  | 191            | 21.781   | 38.8 | NO    | 4             | 0.010034 | 0.322574 |             |           |       |           |      |       |            |      |           |              |              |      |             |              |          | no   |
| 26  | 219            | 25.366   | 25.5 | YES   | 4             | 0.022195 | 0.327411 | 0.022195    | 0.063539  | 21.3  | 737.2     | 90   | 22.2  | 740        | 60   | 19.93     | 1.21         | 2.29         |      |             |              |          | yes  |
| 27  | 227            | 26.734   | 24.8 | YES   | 4             | 0.016724 | 0.317711 | 0.016724    | 0.067806  | 20.3  | 215.01    | 60   | 21.8  | 215        | 58   | 19.74     | 1.27         | 1.67         |      |             |              |          | yes  |
| 31  | 175            | 19.745   | 19   | YES   | 3.6           | 0.024627 | 0.319507 | 0.024627    | 0.065971  | 20.8  | 1652      | 84   | 21.1  | 1688       | 70   | 21.73     | 0.88         | 1.29         |      |             |              |          | yes  |
| 32  | 175            | 19.765   | 19   | YES   | 3.4           | 0.028278 | 0.320143 | 0.028278    | 0.065974  | 20.7  | 633.1     | 72   | 21.6  | 639        | 70   | 21.97     | 1.80         | 0.64         |      |             |              |          | yes  |
| 36  | 175            | 19.813   | 20.3 | YES   | 3.1           | 0.030711 | 0.327438 | 0.030711    | 0.053211  | 24.9  | 504.19    | 100  | 27.5  | 524        | 80   | 24.56     | 1.47         | 0.86         |      |             |              |          | yes  |
| 39  | 179            | 20.141   | 19   | YES   | 3.2           | 0.022195 | 0.327411 | 0.022195    | 0.061107  | 22    | 980.98    | 92   | 23.58 | 1003       | 67   | 21.35     | 0.83         | 2.42         |      |             |              |          | yes  |
| 46  | 167            | 19.28    | 16.2 | YES   | 3.1           | 0.032531 | 0.327411 | 0.032531    | 0.068403  | 20.2  | 2067.3    | 85   | 21.7  | 2121       | 79   | 20.67     | 1.94         | 14.10        |      |             |              |          | yes  |
| 47  | 167            | 19.395   | 16.6 | YES   | 3.2           | 0.022805 | 0.32683  | 0.022805    | 0.0599    | 21.1  | 1063.8    | 85   | 22.25 | 1080       | 76   | 20.34     | 1.81         | 5.13         |      |             |              |          | yes  |
| 49  | 171            | 39.122   | 35.3 | YES   | 4             | 0.013075 | 0.328046 | 0.014291    | 0.061117  | 22.4  | 5917.1    | 94   | 22.34 | 5922       | 70   | 22.31     | 0.77         | 2.84         | 67   | 22.41       | 0.93         | 4.65     | yes  |
| 51  | 183            | 20.432   | 31.5 | NO    | 3.6           | 0.011859 | 0.323763 |             |           |       |           |      |       |            |      |           |              |              |      |             |              |          | no   |
| 52  | 183            | 20.381   | 26.5 | YES   | 3.9           | 0.013075 | 0.328046 | 0.013075    | 0.056252  | 23.7  | 1545.7    | 85   | 24.71 | 1568       | 66   | 20.48     | 2.33         | 6.40         |      |             |              |          | yes* |
| 53  | 183            | 20.467   | 16.6 | YES   | 3.3           | 0.011859 | 0.323763 | 0.011859    | 0.035571  | 25    | 7352.8    | 85   | 24.07 | 7122       | 75   | 21.85     | 0.74         | 11.44        | 87   | 21.18       | 0.82         | 14.05    | yes  |
| 54  | 183            | 20.266   | 22.1 | YES   | 4             | 0.025845 | 0.322574 | 0.025845    | 0.06659   | 20.6  | 2428.3    | 75   | 20.99 | 2443       | 57   | 19.26     | 1.06         | 4.32         | 65   | 20.1        | 0.93         | 2.71     | yes  |
| 55  | 195            | 21.56    | 28.1 | YES   | 4             | 0.015507 | 0.323763 | 0.015507    | 0.39219   | 25.08 | 10530     | 100  | 25.9  | 10410      | 65   | 20.67     | 1.52         | 30.66        |      |             |              |          | yes  |
| 56  | 195            | 21.731   | 28.1 | YES   | 4             | 0.017939 | 0.328019 | 0.017939    | 0.045299  | 27.2  | 3507.5    | 100  | 27.73 | 3501       | 90   | 27.14     | 2.69         | 24.89        |      |             |              |          | no   |
| 57  | 199            | 22.3     | 24.9 | YES   | 3.6           | 0.033143 | 0.317103 | 0.033143    | 0.065374  | 21.1  | 5512      | 63   | 21.5  | 5596       | 67   | 21.03     | 0.71         | 3.89         |      |             |              |          | yes  |
| 58  | 199            | 22.318   | 16.9 | YES   | 3.4           | 0.019764 | 0.320143 | 0.019764    | 0.067198  | 20.4  | 610.87    | 70   | 21    | 617        | 72   | 22.04     | 1.36         | 2.70         |      |             |              |          | yes  |
| 59  | 203            | 22.459   | 19.6 | YES   | 3.9           | 0.033139 | 0.321331 | 0.033139    | 0.059891  | 22.3  | 2647      | 95   | 24.22 | 2723       | 70   | 20.41     | 1.96         | 11.67        |      |             |              |          | yes  |
| 62  | 183            | 20.044   | 16.4 | YES   | 3.3           | 0.032535 | 0.320143 | 0.032535    | 0.070238  | 19.5  | 582.67    | 70   | 20    | 589        | 65   | 19.42     | 1.01         | 1.12         |      |             |              |          | yes  |
| 64  | 239            | 27.18    | 28.2 | YES   | 3             | 0.025237 | 0.323182 | 0.025237    | 0.061117  | 22.5  | 847.94    | 76   | 23.1  | 858        | 67   | 22.12     | 1.81         | 1.35         | 66   | 21.59       | 1.71         | 1.39     | yes  |
| 66  | 227            | 25.153   | 25.4 | YES   | 4             | 0.02767  | 0.323182 | 0.02767     | 0.063549  | 21.5  | 568.3     | 92   | 22.85 | 582.8      | 64   | 20.39     | 2.51         | 1.15         |      |             |              |          | no   |
| 67  | 251            | 28.663   | 28.4 | YES   | 2.8           | 0.02949  | 0.32133  | 0.02949     | 0.050162  | 26.9  | 275.86    | 110  | 29.74 | 289.6      | 86   | 23.83     | 3.71         | 2.74         |      |             |              |          | no   |
| 68  | 255            | 29.804   | 28.4 | YES   | 3.3           | 0.022803 | 0.327411 | 0.022803    | 0.059891  | 22.9  | 2460      | 80   | 23.34 | 2483       | 75   | 23.15     | 0.71         | 2.48         |      |             |              |          | yes  |
| 70  | 211            | 23.8     | 18.3 | YES   | 3             | 0.028275 | 0.327411 | 0.028275    | 0.056243  | 22.9  | 1463.4    | 90   | 24.1  | 1486       | 76   | 21.86     | 1.36         | 8.49         |      |             |              |          | yes  |
| 71  | 211            | 23.566   | 25.8 | YES   | 3.2           | 0.022197 | 0.325006 | 0.022197    | 0.056252  | 24.2  | 3659.3    | 90   | 25.14 | 3701       | 78   | 23.26     | 1.00         | 3.31         |      |             |              |          | yes  |
| 72  | 159            | 17.341   | 15.4 | YES   | 3             | 0.033139 | 0.327411 | 0.033139    | 0.059875  | 24.6  | 685.86    | 90   | 23.45 | 707        | 67   | 20.46     | 1.59         | 1.83         | 71   | 23.13       | 0.95         | 3.11     | yes  |
| 76  | 231            | 52.526   | 57.6 | YES   | 4             | 0.01125  | 0.323762 | 0.020978    | 0.04773   | 28.8  | 7222.7    | 110  | 29.79 | 7298       | 79   | 26.38     | 1.44         | 5.21         |      |             |              |          | yes  |
| 77  | 215            | 24.919   | 22   | YES   | 3.3           | 0.025842 | 0.323164 | 0.025842    | 0.06597   | 20.4  | 2032.8    | 65   | 20.89 | 2043       | 62   | 20.54     | 0.70         | 1.95         |      |             |              |          | yes  |
| 78  | 215            | 24.853   | 22.7 | YES   | 3.2           | 0.025237 | 0.319535 | 0.025237    | 0.065982  | 20    | 1451.5    | 65   | 21.1  | 1458       | 62   | 20.75     | 1.24         | 1.04         |      |             |              |          | yes  |
| 79  | 235            | 26.366   | 24.6 | YES   | 4             | 0.022194 | 0.317074 | 0.022194    | 0.06293   | 20    | 2861.2    | 58   | 20.46 | 2918       | 63   | 20.83     | 0.88         | 3.77         |      |             |              |          | yes  |
| 80  | 239            | 26.805   | 24.7 | YES   | 4             | 0.031314 | 0.322546 | 0.031314    | 0.059282  | 19.9  | 2330.4    | 57   | 19.9  | 2384       | 64   | 20.04     | 0.90         | 2.72         |      |             |              |          | yes  |
| 81  | 239            | 26.888   | 23.7 | YES   | 4             | 0.022805 | 0.324398 | 0.022805    | 0.065374  | 19.4  | 2339.6    | 55   | 19.6  | 2287       | 60   | 19.61     | 0.81         | 1.65         | 64   | 20.11       | 0.89         | 3.17     | yes  |
| 82  | 243            | 27.434   | 24.5 | YES   | 3.3           | 0.024018 | 0.322546 | 0.024018    | 0.06293   | 21.7  | 2106.3    | 70   | 21.9  | 2111       | 70   | 21.24     | 0.64         | 3.47         |      |             |              |          | yes  |

**Vr > 2.5**  
 difference in Rg or Dmax between model and SAXS data > 25%  
 \* designs with dmax discrepancy > 25% and 2 < Vr < 2.5

When experimental mass deviated from expected mass by more than 25% (diff w/in 25% = NO), the design was not further analyzed by Guinier or gnom. Vr is always above 2.5 in these cases.

## Supplementary Table 16 | Protein Sequences

| name  | sequence                                                                                                                                                                                                                                                       |
|-------|----------------------------------------------------------------------------------------------------------------------------------------------------------------------------------------------------------------------------------------------------------------|
| DHR1  | MGCDQVAKDASSTIREVIEKNPNYSEKVDVAAKIVKKIIEGNPNGCDEVAKAASSIIRAVIEKNPNYSEVVADVAAIIVKAIIEGNPN<br>GCDCVAKAASSIIRAVIEKNPNYSEVVADVAAIIVKAIIEGNPNGRDCVRKAASSIIRAVQEKPNPNYSEVVEDVKRAIEKAIKEGNPN<br>WLEHHHHHH                                                             |
| DHR2  | MSDADEAAKEANKAENKARNRNDDEAAKAVKLIKEATERAKKRNESDAVEAAKEAAKALNKALNRNDDEAAKAVALTAEAITRALKRNE<br>SDAVEAAKEAAKALNKALNRNDDEAAKAVALTAEAITRALKRNESDAVEAAKEAAKALNKALNRNDDEQAKHVAKQAENIIRALKRNE<br>WLEHHHHH                                                              |
| DHR3  | MSSEDTVRKIAQKCEAIRESENDCEEAARKCAKTISEAIRESNSELAVRIIAQVCSEAIRESENDCECAARICAKIISEAIRESNSEL<br>AVRIIAQVCSEAIRESENDCECAARICAKIISEAIRESNSELAKRIIKQVCSEAKRESNDTECAKRICKIKSEAKRESNSWLEHHHHH<br>H                                                                      |
| DHR4  | MSYEDECEEKARRVAEKVERLKRSGTSEDEIAEEVAREISEVIRTLKESGSSYEIVICEVARIIVAEIVEALKRSGTSEDEIAEIVARVI<br>SEVIRTLKESGSSYEIVICEVARIIVAEIVEALKRSGTSEDEIAEIVARVISEVIRTLKESGSSYEIVICEVARIIVAEIVEALKRSGTSE<br>DEINEIVRRVKSEVERTLKESGSSWLEHHHHHH                                 |
| DHR5  | MSSEKEELRERLVKICVENAKRKGDDTEAREAAAREAFELVREAAERAGIDSSEVLELAIRLIKECVENAQREGYDISEACRAAAEAFK<br>RVAAEAKRAGITSSSEVLELAIRLIKECVENAQREGYDISEACRAAAEAFKRVAAEAKRAGITSSSETLKRAIEEIRKRVEEAQREGNDIS<br>EACRQAAEEFRKKAEEELKRRGDGWLEHHHHHH                                  |
| DHR6  | MSEKEEELKVVREAAKLGSSDEEARKCFEAREWAERTGSSAYEAAEALFKVLEAAYKLGSSAEAEACECFNQAEEWAERTGSGAYEA<br>AEALFKVLEAAYKLGSSAEAEACECFNQAEEWAERTGSGAYEAAERLFEELERAYEEGSSAEAEACEEFNKKEEAHRKGGKLEHHHHHH<br>H                                                                      |
| DHR7  | MSTKEDARSTCEKAARAAESNDEEVAKQAQKDCLEVAQAGMPTKEAARSFCEAAARAAAESNDEEVAKIAAKACLEVAQAGMPTKE<br>AARSFCEAAARAAAESNDEEVAKIAAKACLEVAQAGMPTKEAARSFCEAAARAAAKESNDEEVEKIAKACKEVAQAGMPWLEHHHHH<br>H                                                                         |
| DHR8  | MSDEMCKVMEALKKAVELAKKNNNDEVAREIERAAKEIVEALRENNNDEMAMVLLAKAVLLAAKNNNDEVAREIARAAAEIVEALRE<br>NNNDEMAMVLLAKAVLLAAKNNNDEVAREIARAAAEIVEALRENNNDEMAMKMLELAKRVLDAAKNNNDETAREIARQAAEEVEADR<br>ENNSWLEHHHHHH                                                            |
| DHR9  | MSYEDEAEKARRVAEKVERLKRSGTSEDEIAEEVAREISEVIRTLKESGSSYEIVAEIVARIVAEIVEALKRSGTSEDEIAEIVARVI<br>SEVIRTLKESGSSYEIVAEIVARIVAEIVEALKRSGTSEDEIAEIVARVISEVIRTLKESGSSYEIVAEIVARIVAEIVEALKRSGTSE<br>DEINEIVRRVKSEVERTLKESGSSWLEHHHHHH                                     |
| DHR10 | MSSEKEELRERLVKIVVENAKRKGDDTEAREAAAREAFELVREAAERAGIDSSEVLELAIRLIKEVVENAQREGYDISEAARAAEAFK<br>RVAAEAKRAGITSSSEVLELAIRLIKEVVENAQREGYDISEAARAAEAFKRVAAEAKRAGITSSSETLKRAIEEIRKRVEEAQREGNDIS<br>EAARQAAEEFRKKAEEELKRRGDGWLEHHHHHH                                    |
| DHR11 | MSDADEAAKEANKAENKARNRNDDEAAKAVKLCKEATERAKKRNESDAVEAAKEAAKALNKALNRNDDEAAKAVALTAEAITRALKRNE<br>SDAVEAAKEAAKALNKALNRNDDEAAKAVALTAEAITRALKRNESDAVEAAKEAAKALNKALNRNDDEQAKHVAKQACENIIRALKRNE<br>WLEHHHHHH                                                            |
| DHR12 | MDDEEQCREIAEKAKQTYTDDEEIARIIEAARQTTTDDDEIERICIAEAAKQTYTDDEEIARI IAYAARQTTTDDDEIERICIAEAAKQ<br>TYTDDEEIARI IAYAARQTTTDDDEIERCIEEAAKQTYTDDEEIERIKEYARRQTTTDGWLEHHHHHH                                                                                            |
| DHR13 | MNAEDKAREVVKELKDEGSPPEEAARQVLKDLNREGSNAEDAARAVLKALKDEGSPPEEAARAVLKALNREGSNAEDAARAVLKALKDE<br>GSPPEEAARAVLKALNREGSNEEDASRAVLKALKDEGSPPEEAARRAVEKALNREGSNGWLEHHHHHH                                                                                              |
| DHR14 | MDSEEVNERVKQLAEKAKEATDKKEEVIEIVKELAEKQSTDSSELVNEIVKQLAEVAKAEATDKELVIYIVKILAEKQSTDSSELVNEI<br>VKQLAEVAKAEATDKELVIYIVKILAEKQSTDSSELVNEIVKQLEEVAKAEATDKELVEHIEKILEELKQSTDSSELVNEI<br>WLEHHHHHH                                                                    |
| DHR15 | MNDERQKQREEVRLAEELASKATDEELIKEIKKAQLAELASRSTNDELIKQILEVAKLAFELASKATDEELIKEILKCCQLAFELA<br>SRSTNDELIKQILEVAKLAFELASKATDEELIKEILKCCQLAFELASRSTNDEEIKQILETAKEAFERASKATDEEIEKILKCCQKQEF<br>EKKSRSSTNGWLEHHHHHH                                                     |
| DHR16 | MNDKAKEAEELLRKALEKAEKENDETAIRCVELLKEALERAKKNNNDKAI EAVELLAKALEKALKENDETAIRCVELLAEALLRALKNN<br>NDKAI EAVELLAKALEKALKENDETAIRCVELLAEALLRALKNNNDKAI EEVERLAKALEKALKENDETKIREVCERAEELLRRLKNNN<br>WLEHHHHHH                                                         |
| DHR17 | MSEEDAREKIEQLCREAKEIAERAKQNSQEEAREAEIKLLRIAKRIAEKQANQSEVAREAEICLCRIAKLIAELAKQANSQEVARE<br>AIEALLRIAKLIAELAKQANQSEVAREAEICLCRIAKLIAELAKQANSQEVAREAEIALLRIAKLIAELAKQANQSEVAREAEICLSRI<br>AKLIEELAKQANSQEVKREAEALDRIQKLEELQKQANQGWLEHHHHHH                        |
| DHR18 | MDIEKLCCKAESEAREARSKAEELRQRHPDSQAARDAQKLASQAEAVKLACELAQEHPNADIAKLCIKAASEAAEAASKAAELAQRHP<br>DSQAARDAIKLASQAAEAVKLACELAQEHPNADIAKLCIKAASEAAEAASKAAELAQRHPDSQAARDAIKLASQAAEAVKLACELAQEH<br>PNADIAKCKCIKASEAAEAASKAAEAQRHPDSQKARDEIKASQKAEVVKERCERAEHPNAWLEHHHHHH |
| DHR19 | MDEIEKVVREAEKLLKKTDDDEDVLEVAREAIRAAKEATSDEILKVIKEALKLAKKTTDKDVLVAREAIRAAEATDDEILKVIKEALK<br>LAKKTTDKDVLVAREAIRAAEATDDEILKVIKEALKLAKKTTDTEELEKAREQIRKAEESTDVGWLEHHHHHH                                                                                          |
| DHR20 | MSDIEEIRQLAEELRKKSDNEEVRKLAQEAELAKRSTDSVLEIVKDALELAKQSTNEEVIKALKAALVLAAKSTDSVLEIVKDALE<br>LAKQSTNEEVIKALKAALVLAAKSTDEEVLVEEKALRRAKSTDEEIEKEELRKAVEEAESTDVGWLEHHHHHH                                                                                            |
| DHR21 | MSEKEKVEELAQRIEQLPDTLAREAEQELADEARKSDSEALKVYVLLALRIVQQLPDTLAREALELAKAEVKTSDSEALKVYVLLALR<br>IVQQLPDTLAREALELAKAEVKTSDSEALKVYVLLALRIVQQLPDTLAREALELAKAEVKTSDSEALKVYVLLALR                                                                                       |
| DHR22 | MDDAEELRERARDLRKNGSSEEEIKKVDDELEKIVRKADSDDAVKLAVKAAALLAENGSSAEIEVKVLEELKIVEKADSDDAVKLAV<br>KAAALLAENGSSAEIEVKVLEELKIVEKADSEEVKDAVREAAELAERGSSAEIEVKVLEELKIVEKADSDDAVKLAV                                                                                       |
| DHR23 | MSDSEKLAKRVKELKRRGTSDEELERMKRELEKIKSATSSDAMRLALRVVLELVRRGTSSEILEKMMRLIKI IQSATSSDAMRLAL<br>RVVLELVRRGTSSEILEKMMRLIKI IQSATSSDAMRLALRVVLELVRRGTSSEIQLESMRMLIKI IKKRTSGWLEHHHHHH                                                                                 |
| DHR24 | MSEAEELARRAAKEAKELCKRSTDEELCKELKLAELKELAEYRYPDSEAAKLALKAALAEIELCKQSTDEELCEELVKLAQKLI ELAK<br>RYPDSEAAKLALKAALAEI ELCKQSTDEELCEELVKLAQKLI ELAKRYPDSEAAKRALKEKELIEQCKESTDEDECRELVKRAEELIR<br>EAKENPDGWLEHHHHHH                                                   |
| DHR25 | MDERDKVRELIDRVKELKREGTSEELIEEIRKVLKKAKEAADSDDDEAIVKAKEIVRVILELVREGTSSSEILEKVLVSLAAEAAKS<br>TDDEAIVKAKEIVRVILELVREGTSSSEILEKVLVSLAAEAAKSTDEEAIVKAKEIVRVILELVREGTSSSEILEKVLKELRKAQKAK<br>SPEGWLEHHHHHH                                                           |
| DHR26 | MDECERLRQVEVEKAEKELEKLAQSTDEEVRQIAREVAKQLRRLAAEEACRSNSDECLRLASEVVKAVQELVKLAEQATDEEIVRVALE<br>ARELIRLAQEAACRSNDDECLRLASEVVKAVQELVKLAEQATDEEIVRVALEVARELIRLAQEAACRSNDDEECLREASEVVKAVQELVKEA                                                                      |

|       |                                                                                                                                                                                                                                                                            |
|-------|----------------------------------------------------------------------------------------------------------------------------------------------------------------------------------------------------------------------------------------------------------------------------|
|       | EKSTDEEEIRELLQRAEERIREAQERCREGDGLWEHHHHHH                                                                                                                                                                                                                                  |
| DHR27 | MTRQKEQLDEVLEETIQRLEAEARKLMTDEEEAKIQQEEAEAKEMLRRAVEKVTDNEVIEKLEEVVKEIIRLAEAEAMKMTDEEEAAKI<br>AKEALEAIKMLARAVEEVDNEVIEKLEEVVKEIIRLAEAEAMKMTDEEEAAKI<br>AKEALEAIKMLARAVEEVDKERIEQLLREVKEEIR<br>RRAEEESRKETDDEEAAKRAREALRRIRERAREVEEDKSGWLEHHHHHH                             |
| DHR28 | MDEEVQRIRREVRRAIEEVRESLERNDSEAEELAREALERVAEVEKSIKERPDRDLAIEATRRLVRLAIEIVRLALEQNDSELAREV<br>AEEALRAVAEVEVKEAIRQRGDRDLAIEATRRLVRLAIEIVRLALEQNDSELAREVAEEALRAVAEVEVKEAIRQRGDRELAKEAIRALRR<br>LAEIIRRLAEQNDDELAREVEELAREAIEEVRKELERQRPGRGWLEHHHHHH                             |
| DHR29 | MSEVEESAQEVKEKRAQEVREAEERRGTSQEVLDIIRVVDEARQLAQRAKESDDSEVAESALQVVREALKVVLSALERGTSEEVLKEIL<br>RVVSEAIKLALAEIKSSDSEVAESALQVVREALKVVLSALERGTSEEVLKEILRVVSEAIKLALAEIKSSDSEVARRALEKVVRESLKEV<br>LEQLERGTSEEELRESLREVSSENIRKALEEIKSPDGWLEHHHHHH                                  |
| DHR30 | MSTVKELLDREARLRELAERASEQGSDEEAEARKLLEDLEQLVQIEIRRELEETGTSSEVIRLIAKAIMLMAELALRAAEQGSDAEAMK<br>LLKDLLRLVLEILRELRETTGTDSEVIRLIAKAIMLMAELALRAAEQGSDAEAMKLLKDLLRLVLEILRELRETTGTDKEEIRKVAEEM<br>RRAKTALDEARQGSDAEAMKRLKEQLRRLILRLREEREKGTGDLWEHHHHHH                             |
| DHR31 | MDSYTERARKAVKRYVKEGGSEEEAEAEKVVREIRKASDSYLIQAAAAVVAVYVIEEGGSPEEAVKIAEEVVRRIKKEADDSYLIQ<br>AAAAVVAVYVIEEGGSPEEAVKIAEEVVRRIKKEADDSYLIQAAAAVVAVYVIEEGGSPEEAVKIAEEVVRRIKKEADDSYLIQ<br>AAAAVVAVYVIEEGGSPEEAVKIAEEVVRRIKKEADDSYLIQAAAAVVAVYVIEEGGSPEEAVKIAEEVVRRIKKEADDSYLIQ     |
| DHR32 | MSIQEKAKRFVIRVKEEGSSEEAERAKEVEKADDSYLIQAAAAVVAVYVIEEGGSPEEAVKIAEEVVRRIKKEADDSYLIQ<br>AAAAVVAVYVIEEGGSPEEAVKIAEEVVRRIKKEADDSYLIQAAAAVVAVYVIEEGGSPEEAVKIAEEVVRRIKKEADDSYLIQ<br>AAAAVVAVYVIEEGGSPEEAVKIAEEVVRRIKKEADDSYLIQAAAAVVAVYVIEEGGSPEEAVKIAEEVVRRIKKEADDSYLIQ          |
| DHR33 | MSETTEVKKLVVEEVKKEGGSPEEAKETAKEVTEELKEESQDSTLLKVAALVASAVLKEGGSPEEAAETAKEVVKELRKSASDSTLLKV<br>AALVASAVLKEGGSPEEAAETAKEVVKELRKSASDSTLLKVAALVASAVLKEGGSPEEAAETAKEVVKELRKSASDSTLLKV<br>AALVASAVLKEGGSPEEAAETAKEVVKELRKSASDSTLLKVAALVASAVLKEGGSPEEAAETAKEVVKELRKSASDSTLLKV      |
| DHR34 | MSETTEVKKLVVEEVKKEGGSPEEAKETAKEVTEELKEESQDSTLLKVAALCASAVLKEGGSPEEAAETAKEVVKELRKSASDSTLLKV<br>AALCASAVLKEGGSPEEAAETAKEVVKELRKSASDSTLLKVAALCASAVLKEGGSPEEAAETAKEVVKELRKSASDSTLLKV<br>AALCASAVLKEGGSPEEAAETAKEVVKELRKSASDSTLLKVAALCASAVLKEGGSPEEAAETAKEVVKELRKSASDSTLLKV      |
| DHR35 | MSEDEVAQASRYAKEQGGDPEKSRREEAEKALEEVKQATSSALQVALEAARYASEEGEDPAEALKEAARALEEVRRSATSSALQV<br>ALEAARYASEEGEDPAEALKEAARALEEVRRSATSSALQVALEAARYASEEGEDPAEALKEAARALEEVRRSATSSALQV<br>ALEAARYASEEGEDPAEALKEAARALEEVRRSATSSALQVALEAARYASEEGEDPAEALKEAARALEEVRRSATSSALQV              |
| DHR36 | MSDLEKALKRFFVIRVKEEGSSEEAERAKEVEKADDSYLIQAAAAVVAVYVIEEGGSPEEAVKIAEEVVRRIKKEADDSYLIQ<br>AAAAVVAVYVIEEGGSPEEAVKIAEEVVRRIKKEADDSYLIQAAAAVVAVYVIEEGGSPEEAVKIAEEVVRRIKKEADDSYLIQ<br>AAAAVVAVYVIEEGGSPEEAVKIAEEVVRRIKKEADDSYLIQAAAAVVAVYVIEEGGSPEEAVKIAEEVVRRIKKEADDSYLIQ        |
| DHR37 | MSSTERRAAQSVKYLQOQKDPDQAQKKAQEVKENEANSSSVIRAAAACVFYLLQOQYDQDQALKKAQEVARNIENEANSSSVIRA<br>AAAACVFYLLQOQYDQDQALKKAQEVARNIENEANSDDVIEKAAKVVYKRLQOQYDQDQALKKAQEVARNIENEANSSSVIRA<br>AAAACVFYLLQOQYDQDQALKKAQEVARNIENEANSDDVIEKAAKVVYKRLQOQYDQDQALKKAQEVARNIENEANSSSVIRA        |
| DHR38 | MSSTERRAAQSVKYLQOQKDPDQAQKKAQEVKENEANSSSVIRAAAACVFYLLQOQYDQDQALKKAQEVARNIENEANSSSVIRA<br>AAAACVFYLLQOQYDQDQALKKAQEVARNIENEANSDDVIEKAAKVVYKRLQOQYDQDQALKKAQEVARNIENEANSSSVIRA<br>AAAACVFYLLQOQYDQDQALKKAQEVARNIENEANSDDVIEKAAKVVYKRLQOQYDQDQALKKAQEVARNIENEANSSSVIRA        |
| DHR39 | MSDLQEVADRIVEQLKREGRSPEARKEARRLIEEIKQSAGGDSSEIEVAVRIVKELEEQGRSPSEAAKEAVELIERIRRAAGGDSSEI<br>EVAVRIVKELEEQGRSPSEAAKEAVELIERIRRAAGGDSSEIIRRAAGGDSSEIIRRAAGGDSSEIIRRAAGGDSSEIIRRAAGGDSSEI<br>H                                                                                |
| DHR40 | MSESEVAKRISKEAKKEGRSEEVKELVERFREAIEKLEKQGDSEAIRVAEIADEALREGLSPEEVELVERFVQAIQKLQENGES<br>AIRVAEIADEALREGLSPEEVELVERFVQAIQKLQENGESDEIQKAVETAQOQLEEGRSPEEVEVVEEQVKEVEEKQKQKGEWLEH<br>HHHH                                                                                     |
| DHR41 | MSDIEKAKRIADRAIDVVRKAAEKEGGSPEKIREALQOAKRCAEKLIRLVKEAQESNSSDVREARVALEAVRVVRAAEKGGSPPEV<br>VEAVCRAVCAEKLIRLVKRAEESNSSDVREARVALEAVRVVRAAEKGGSPPEVVEAVCRAVCAEKLIRLVKRAEESNSSENVR<br>ARRALEKVLKTVQOAEKEGKSPEEVEVQVCRSVRKAEEQIRETQERERSTSGWLEHHHHHH                             |
| DHR42 | MSDAEVEVKKQAEIANRAYKTAQKQGESDSRAKKAQELVRKAAEKLARLIERAQKEGDSDALEVARQALEIARRAFETAKKQGHSA<br>TEAKAFVDDVVEAASLAEELISAKRQGDSDALEVARQALEIARRAFETAKKQGHSA<br>TEAKAFVDDVVEAASLAEELISAKRQGDSDALEVARQALEIARRAFETAKKQGHSA<br>TEAKAFVDDVVEAASLAEELISAKRQGDSDALEVARQALEIARRAFETAKKQGHSA |
| DHR43 | MSKEELIERKARRVAKAIEEAKRQKDPSEAKKAAEKLIKAVEEAVKAEKRLKEEGNSELAELISEAIQVAVEAVEAVRQKDPFKA<br>AEAAAEIIRAVVEAVKEARLKRGNSELAELISEAIQVAVEAVEAVRQKDPFKA<br>AEAAAEIIRAVVEAVKEARLKRGNSELAELISEAIQVAVEAVEAVRQKDPFKA<br>AEAAAEIIRAVVEAVKEARLKRGNSELAELISEAIQVAVEAVEAVRQKDPFKA           |
| DHR44 | MSNEQEKKDLKKAEEAAKSPDPPELIERAIEAEEAAGSNGKAKEIIRAAEAAKSPDPPELIRLAIIEAERSGNSKAKEIIRAAEAAK<br>SPDPPELIRLAIIEAERSGSEKAKEIKRAEAAKSPDPPELQKLAKEARERLGGWLEHHHHHH                                                                                                                  |
| DHR45 | MSSEEELEKDAEASESGADPEWLREIVDLARESGDSEVIELAKRALEAAKSGADPEWLLRIVRQAEESGSEVIELAKRALEAAKSG<br>ADPEWLLRIVRQAEESGSEVIELAKRALEAAKSGADPEWLLRIVRQAEESGSEVIELAKRALEAAKSGADPEWLLRIVRQAEESG<br>SEVIELAKRALEAAKSGADPEWLLRIVRQAEESGSEVIELAKRALEAAKSGADPEWLLRIVRQAEESGSEVIELAKRALEAAKSG   |
| DHR46 | MSTKEEKERIERIEKEVRSPPDENIREAVRKAEEELLRENPSSTAEELLRRAIEAAVRAPDPEAIREAVRAAEELLRENPSSTAEELLR<br>AIEAAVRAPDPEAIREAVRAAEELLRENPSSEAKELLRRAIESAKKAPDPEAQREAKRAEEELRKEDPGWLEHHHHHH                                                                                                |
| DHR47 | MSTKEEKERIERIEKEVRSPPDENIREAVRKAEEELLRENPSSTAEELLRRAIEAAVRAPDPEAIREAVRAAEELLRENPSSTAEELLR<br>AIEAAVRAPDPEAIREAVRAAEELLRENPSSEAKELLRRAIESAKKAPDPEAQREAKRAEEELRKEDPGWLEHHHHHH                                                                                                |
| DHR48 | MNSREEEAKRIVKEAKSGFDPEEVEKALREVIRVAEETGNSEALKEALKIVEEAAKSGYDPAEVAKALAEVIRVAEETGNSEALKEA<br>LKIVEEAAKSGYDPAEVAKALAEVIRVAEETGNPEELKEALKRVLEAAKRGEDPAQVAKELAEIIRRNQOEGGWLEHHHHHH                                                                                              |
| DHR49 | MDSEEEQERIRRIKLEARKSGTESLRQAIEDVAQLAKKSQDSEVLEEAIRVILRIKESGSEALRQAIIRAVAEIAKEAQDSEVLEEA<br>IRVILRIKESGSEALRQAIIRAVAEIAKEAQDPRVLEEAIRVIRQIAEESGSEARRQAERAEIIRRAOQGWLEHHHHHH                                                                                                 |
| DHR50 | MDPEEVRREVERATEEYRKNPGSDEAREQLKEAVERAEEAARSPPDPAVQVAVEAATQIYENTPGSEAAKALEIIVRAAENAARLPD<br>EAVQVAVEAATQIYENTPGSEAAKALEIIVRAAENAARLPDPAVAVRVAEEAADQIRKNTPGSELAKRADEIKKRARELLERLPWLEH<br>HHHH                                                                                |
| DHR51 | MQSEDRKEKIRELERKARENTGSDARQAVKEIARIAKEALEEGNADTAKEAIQRLEDLARDYSGSDVASLAVKAIKIAETALRNGYA<br>DTAKEAIQRLEDLARDYSGSDVASLAVKAIKIAETALRNGYKETAEEAIKRLRELAEDYKGVSEVAKLAEAEIERIEKVSRRERGGWLEH<br>HHHH                                                                              |
| DHR52 | MQSEDRKEKIRELERKARENTGSDARQAVKEIARIAKEALEEGCDDTAKEAIQRLEDLARDYSGSDVASLAVKAIKIAETALRNGCC<br>DTAKEAIQRLEDLARDYSGSDVASLAVKAIKIAETALRNGCKETAEEAIKRLRELAEDYKGVSEVAKLAEAEIERIEKVSRRERGGWLEH<br>HHHH                                                                              |
| DHR53 | MSNDEKELKELLKRAEELAKSPDPEDLKEAVRLAEVVRERPGSNLAKKALEIIRAAEELAKLPDPEALKEAVKAAEKVVREQPGSN<br>LAKKALEIIRAAEELAKLPDPEALKEAVKAAEKVVREQPGSELAKKALEIIRAAEELKKSPPDPEAQKAEKAEQKVVREERPGWLEH<br>HHHH                                                                                  |
| DHR54 | MTTEDERRELEKVARKAIIEAAREGNTDEVREQLQRALEIARESQTTEAVKLAEVVARVAIEAARRGNTDAVREALEVALEIARESQT<br>EAVKLAEVVARVAIEAARRGNTDAVREALEVALEIARESQTTEAVRLAEVVKRVSDAKKQGNEDAVKEAEEVRRKIEEESGGWLEH<br>HHHH                                                                                 |



|       |                                                                                                                                                                                                                                                         |
|-------|---------------------------------------------------------------------------------------------------------------------------------------------------------------------------------------------------------------------------------------------------------|
|       | KIVKAIQEAVESLREAEEESGDPEKREKARERVREAVERAEEVQRDPSGWLEHHHHH                                                                                                                                                                                               |
| DHR80 | MNSEELERESEEAERRLQEARKRSEEARERGDLELAEALIEEARAVQELARVASERGNSEEAERASEKAQRVLEEARKVSEEARQGD<br>DEVLALALIAIALAVLALAEVASSRGNSEEAERASEKAQRVLEEARKVSEEARQGDDEVLALALIAIALAVLALAEVASSRGNKEEAE<br>RAYEDARRVEEEARKVKESAEEQGDSEVKRLAEAEQLAREARRHVQETRGGWLEHHHHH      |
| DHR81 | MNSEELERESEEAERRLQEARKRSEEARERGDLELAEALIEEARAVQELARVACERGNSEEAERASEKAQRVLEEARKVSEEARQGD<br>DEVLALALIAIALAVLALAEVACCRGNSEEAERASEKAQRVLEEARKVSEEARQGDDEVLALALIAIALAVLALAEVACCRGNKEEAE<br>RAYEDARRVEEEARKVKESAEEQGDSEVKRLAEAEQLAREARRHVQECRGGWLEHHHHH      |
| DHR82 | MNDEEVQEAVERAEELREEAEELIKKARKTGPELLLRKALEALEEAVRAVEEAIKRNPNDNAVETAVRLARELKKVAEELQERAKKTG<br>DPELLKLALRALEVAVRAVELAIKSNPDNEAVETAVRLARELKKVAEELQERAKKTGPELLKLALRALEVAVRAVELAIKSNPDNEE<br>AVETAKRLAEELRKVAELLEERAKETGDPELQELAKRAKEVADRARELAKKSNPNGWLEHHHHH |
| DHR83 | MNDEEVQEAVERAEELREEAEELIKKARKTGPELLLRKALEALEEAVRAVEEAIKRNPNDNAVETAVRLARELKKVAEELQERAKKTG<br>DPELLKLALRALEVAVRAVELAIKSNPDNECVETACRLARELKKVAEELQERAKKTGPELLKLALRALEVAVRAVELAIKSNPDNEE<br>CVETAKRLAEELRKVAELLEERAKETGDPELQELAKRAKEVADRARELAKKSNPNGWLEHHHHH |

## Supplementary References

1. Leaver-Fay, A. *et al.* ROSETTA3: an object-oriented software suite for the simulation and design of macromolecules. *Methods Enzymol.* **487**, 545–574 (2011).
2. Rohl, C. A., Strauss, C. E. M., Misura, K. M. S. & Baker, D. in *Methods in Enzymology* (ed. Johnson, L. B. and M. L.) **383**, 66–93 (Academic Press, 2004).
3. Wintjens, R. T., Rooman, M. J. & Wodak, S. J. Automatic Classification and Analysis of  $\alpha$ -Turn Motifs in Proteins. *J. Mol. Biol.* **255**, 235–253 (1996).
4. Koga, N. *et al.* Principles for designing ideal protein structures. *Nature* **491**, 222–227 (2012).
5. Kuhlman, B. & Baker, D. Native protein sequences are close to optimal for their structures. *Proc. Natl. Acad. Sci.* **97**, 10383–10388 (2000).
6. Sheffler, W. & Baker, D. RosettaHoles: Rapid assessment of protein core packing for structure prediction, refinement, design, and validation. *Protein Sci.* **18**, 229–239 (2009).
7. Parmeggiani, F. *et al.* A General Computational Approach for Repeat Protein Design. *J. Mol. Biol.* **427**, 563–575 (2015).
8. Kuhlman, B. *et al.* Design of a Novel Globular Protein Fold with Atomic-Level Accuracy. *Science* **302**, 1364–1368 (2003).
9. Jones, D. T. Protein secondary structure prediction based on position-specific scoring matrices. *J. Mol. Biol.* **292**, 195–202 (1999).
10. Bradley, P., Misura, K. M. S. & Baker, D. Toward High-Resolution *de Novo* Structure Prediction for Small Proteins. *Science* **309**, 1868–1871 (2005).
11. Das, R. *et al.* Structure prediction for CASP7 targets using extensive all-atom refinement with Rosetta@home. *Proteins Struct. Funct. Bioinforma.* **69**, 118–128 (2007).
12. Huang, P.-S. *et al.* RosettaRemodel: A Generalized Framework for Flexible Backbone Protein Design. *PLoS ONE* **6**, e24109 (2011).

13. Kajava, A. V. Tandem repeats in proteins: From sequence to structure. *J. Struct. Biol.* **179**, 279–288 (2012).
14. Di Domenico, T. *et al.* RepeatsDB: a database of tandem repeat protein structures. *Nucleic Acids Res.* **42**, D352–D357 (2014).
15. Li, W. & Godzik, A. Cd-hit: a fast program for clustering and comparing large sets of protein or nucleotide sequences. *Bioinformatics* **22**, 1658–1659 (2006).
16. Fu, L., Niu, B., Zhu, Z., Wu, S. & Li, W. CD-HIT: accelerated for clustering the next-generation sequencing data. *Bioinformatics* **28**, 3150–3152 (2012).
17. Zhang, Y. & Skolnick, J. TM-align: a protein structure alignment algorithm based on the TM-score. *Nucleic Acids Res.* **33**, 2302–2309 (2005).
18. Walsh, I. *et al.* RAPHAEL: recognition, periodicity and insertion assignment of solenoid protein structures. *Bioinformatics* **28**, 3257–3264 (2012).
19. Punta, M. *et al.* The Pfam protein families database. *Nucleic Acids Res.* **40**, D290–D301 (2012).
20. Kabsch, W. & Sander, C. Dictionary of protein secondary structure: Pattern recognition of hydrogen-bonded and geometrical features. *Biopolymers* **22**, 2577–2637 (1983).
21. Kobe, B. & Kajava, A. V. When protein folding is simplified to protein coiling: the continuum of solenoid protein structures. *Trends Biochem. Sci.* **25**, 509–515 (2000).
22. Altschul, S. F. *et al.* Gapped BLAST and PSI-BLAST: a new generation of protein database search programs. *Nucleic Acids Res.* **25**, 3389–3402 (1997).
23. Remmert, M., Biegert, A., Hauser, A. & Söding, J. HHblits: lightning-fast iterative protein sequence searching by HMM-HMM alignment. *Nat. Methods* **9**, 173–175 (2012).

24. Weiss, M. S. & Hilgenfeld, R. On the use of the merging R factor as a quality indicator for X-ray data. *J. Appl. Crystallogr.* **30**, 203–205 (1997).
25. Chen, V. B. *et al.* MolProbity: all-atom structure validation for macromolecular crystallography. *Acta Crystallogr. Sect. D* **66**, 12–21 (2010).
26. Petoukhov, M. V. *et al.* New developments in the ATSAS program package for small-angle scattering data analysis. *J. Appl. Crystallogr.* **45**, 342–350 (2012).
27. Classen, S. *et al.* Implementation and performance of SIBYLS: a dual endstation small-angle X-ray scattering and macromolecular crystallography beamline at the Advanced Light Source. *J. Appl. Crystallogr.* **46**, 1–13 (2013).
28. Rambo, R. P. & Tainer, J. A. Characterizing flexible and intrinsically unstructured biological macromolecules by SAS using the Porod-Debye law. *Biopolymers* **95**, 559–571 (2011).
29. Rambo, R. P. & Tainer, J. A. Accurate assessment of mass, models and resolution by small-angle scattering. *Nature* **496**, 477–481 (2013).
